# Supplementary material for: Redox-neutral manganese-catalyzed synthesis of 1-pyrrolines
Source: Royal Society of Chemistry journal article supplement (doi:10.1039/d2sc00015f), 2022-01-01

## Supporting Information

# Redox-neutral Manganese-Catalyzed Synthesis of 1-Pyrrolines

Tingting Feng,<sup>a</sup> Canxiang Liu,<sup>a</sup> Zhen Wu,<sup>a</sup> Xinxin Wu,<sup>\*a</sup> and Chen Zhu<sup>\*ab</sup>

<sup>a</sup>Key Laboratory of Organic Synthesis of Jiangsu Province, College of Chemistry, Chemical Engineering and Materials Science, Soochow University, 199 Ren-Ai Road, Suzhou, Jiangsu 215123, People's Republic of China

<sup>b</sup>Frontiers Science Center for Transformative Molecules, Shanghai Jiao Tong University, 800 Dongchuan Road, Shanghai 200240, People's Republic of China

### Table of Contents

|                                                                     |     |
|---------------------------------------------------------------------|-----|
| 1. General experimental details                                     | S2  |
| 2. General procedure for synthesis of cyclopropanols                | S2  |
| 3. General procedure for synthesis of oxime ethers                  | S3  |
| 4. General procedure for synthesis of pyrroline products            | S5  |
| 5. Gram-scale reaction                                              | S15 |
| 6. Transformation of compound <b>3a</b>                             | S15 |
| 7. Mechanistic studies                                              | S18 |
| 8. References                                                       | S21 |
| 9. <sup>1</sup> H, <sup>13</sup> C, and <sup>19</sup> F NMR Spectra | S22 |

## 1. General experimental details

All reactions were maintained under a nitrogen atmosphere unless otherwise stated. Commercially available reagents were used without further purification. Infrared (FT-IR) spectra were recorded on a BRUKER VERTEX 70,  $\nu_{\text{max}}$  in  $\text{cm}^{-1}$ .  $^1\text{H-NMR}$  spectra were recorded on a BRUKER AVANCE III HD (400 MHz) spectrometer. Chemical shifts are reported in ppm from tetramethylsilane with the solvent resonance as internal standard ( $\text{CDCl}_3$ :  $\delta$  7.26). Data are reported as follows: chemical shift, multiplicity (s = singlet, d = doublet, t = triplet, q = quadruplet, br = broad, m = multiplet), coupling constants (Hz) and integration.  $^{13}\text{C-NMR}$  spectra were recorded on a BRUKER AVANCE III HD (100 MHz) spectrometer with complete proton decoupling. Chemical shifts are reported in ppm from tetramethylsilane with the solvent resonance as the internal standard ( $\text{CDCl}_3$ :  $\delta$  77.16).  $^{19}\text{F-NMR}$  spectra were recorded on a BRUKER AVANCE III HD (376 MHz) spectrometer. Mass spectra were measured with an Agilent Technologies 6120 Quadrupole LC/MS. High resolution mass spectrometry (HRMS) were measured with a GCT Premier<sup>TM</sup> and BRUKER micrOTF-Q III. Melting points were measured using INESA WRR and values are uncorrected.

## 2. General procedure for synthesis of cyclopropanols

The starting material cyclopropanols were prepared according to the reported procedure<sup>1</sup>. Cyclopropanols **1a-n**, **1p**, **1q**, **1s**, and **1u-1v** are known compounds. The spectrum data of cyclopropanols **1a-b**, **1f-h**, **1l**, **1n**, **1p-1q**, **1s**, and **1v** can be found in Ref. 1a. The spectrum data of **1e**, **1j**, and **1m** can be found in Ref. 1b. The spectrum data of **1i** can be found in Ref. 1c. The spectrum data of **1k** can be found in Ref. 1d. The spectrum data of **1u** can be found in Ref. 1e. The spectrum data of **1w** and **1x** can be found in Ref. 1f.

Other cyclopropanols were prepared according to the following procedures:

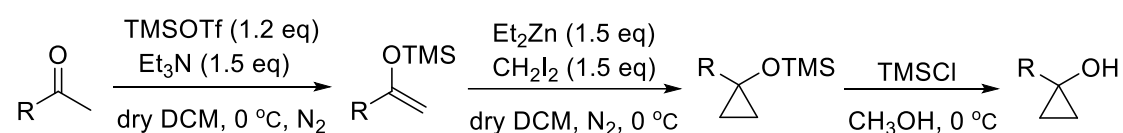

**Step one:** Ketone (5 mmol, 1.0 equiv.) was added to a 100 mL flame-dried round-bottomed flask at  $0\text{ }^\circ\text{C}$  under nitrogen. Anhydrous  $\text{DCM}$  (20 mL) was added to the flask, followed by adding  $\text{Et}_3\text{N}$  (7.5 mmol, 1.5 equiv.). Then  $\text{TMSOTf}$  (6 mmol, 1.2 equiv.) was added dropwise via syringe over 10 min. The reaction was stirred overnight, which was monitored by TLC. Upon completion, the reaction was quenched with sat.  $\text{NaHCO}_3$ , diluted with  $\text{DCM}$ . The aqueous layer was extracted with  $\text{DCM}$  (3 x 15 ml). The combined organic layer was washed with brine, dried over  $\text{Na}_2\text{SO}_4$ , and concentrated in vacuum. The enol ether was used in the next step without further purification.

**Step two:** The enol ether was transferred to a 100 mL flame-dried round-bottomed flask under nitrogen. The flask was charged with anhydrous  $\text{DCM}$  (30 mL) and diiodomethane (7.5 mmol, 1.5 equiv.). The mixture was cooled to  $0\text{ }^\circ\text{C}$ , then neat diethyl zinc (7.5 mmol, 1M in toluene, 1.5 equiv.) was added dropwise to the reaction solution via syringe. The mixture was warmed to room temperature and stirred for 16 h. The reaction was quenched with a sat.  $\text{NH}_4\text{Cl}$  at  $0\text{ }^\circ\text{C}$ . The layers were separated and the aqueous layer was extracted with  $\text{DCM}$  (3 x 15 ml). The combined organic layer was washed with brine, dried over  $\text{Na}_2\text{SO}_4$ , and concentrated in vacuum. The crude TMS

ether was also used in the next step without further purification.

**Step three:** The crude TMS ether was transferred to a 100 mL flame-dried round-bottomed flask under nitrogen. The flask was charged with methanol (30 mL). A single drop of chlorotrimethylsilane was added via syringe at 0 °C, and the reaction was monitored by TLC. The reaction was completed in about 1 h, then the mixture was concentrated to dryness in vacuum and the residue was purified by flash column chromatography on silica gel. The following cyclopropanol products were synthesized using the procedure described above:

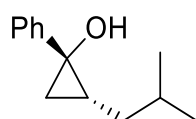

**1o:** white solid, m.p. 78-79 °C. Purification by flash column chromatography on silica gel (eluent: EtOAc/Petroleum ether = 1/20). <sup>1</sup>H NMR (400 MHz, CDCl<sub>3</sub>) δ 7.36-7.28 (m, 4H), 7.24-7.18 (m, 1H), 2.11 (br, 1H), 1.80-1.69 (m, 1H), 1.64-1.49 (m, 2H), 1.27-1.14 (m, 2H), 0.98 (d, *J* = 6.8 Hz, 3H), 0.96 (d, *J* = 6.4 Hz, 3H), 0.88-0.84 (m, 1H); <sup>13</sup>C NMR (100 MHz, CDCl<sub>3</sub>) δ 145.5, 128.3, 126.1, 124.0, 59.2, 36.8, 28.7, 27.6, 23.0, 22.7, 22.5. FT-IR: ν (cm<sup>-1</sup>) 2953, 2868, 1602, 1496, 1467, 1448, 1382. HRMS [ESI] calcd for C<sub>13</sub>H<sub>18</sub>ONa [M+Na]<sup>+</sup> 213.1250, found 213.1256.

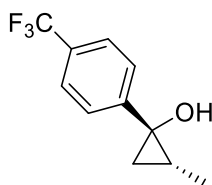

**1r:** white solid, m.p. 79-80 °C. Purification by flash column chromatography on silica gel (eluent: EtOAc/Petroleum ether = 1/20). <sup>1</sup>H NMR (400 MHz, CDCl<sub>3</sub>) δ 7.59-7.54 (m, 2H), 7.38-7.33 (m, 2H), 2.15 (br, 1H), 1.36-1.32 (m, 3H), 1.31-1.25 (m, 2H), 0.96-0.89 (m, 1H); <sup>13</sup>C NMR (100 MHz, CDCl<sub>3</sub>) δ 149.9, 128.1 (q, *J*<sub>C-F</sub> = 32.1 Hz), 125.2 (q, *J*<sub>C-F</sub> = 3.7 Hz), 124.3 (q, *J*<sub>C-F</sub> = 270.0 Hz), 123.7, 58.7, 25.3, 24.5, 12.5; <sup>19</sup>F NMR (376 MHz, CDCl<sub>3</sub>) δ -62.3 (s). FT-IR: ν (cm<sup>-1</sup>) 3341, 1621, 1455, 1410, 1329, 1305, 1243. HRMS [EI] calcd for C<sub>11</sub>H<sub>11</sub>F<sub>3</sub>O [M]<sup>+</sup> 216.0757, found 216.0759.

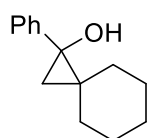

**1t:** white solid, m.p. 53-54 °C. Purification by flash column chromatography on silica gel (eluent: EtOAc/Petroleum ether = 1/20). <sup>1</sup>H NMR (400 MHz, CDCl<sub>3</sub>) δ 7.43-7.38 (m, 2H), 7.36-7.31 (m, 2H), 7.28-7.23 (m, 1H), 2.26 (br, 1H), 1.86-1.57 (m, 4H), 1.53-1.39 (m, 2H), 1.34-1.24 (m, 2H), 1.07 (d, *J* = 5.6 Hz, 1H), 1.08-0.98 (m, 1H), 0.93-0.85 (m, 1H), 0.70 (d, *J* = 5.6 Hz, 1H); <sup>13</sup>C NMR (100 MHz, CDCl<sub>3</sub>) δ 141.4, 128.2, 128.0, 127.1, 65.2, 32.6, 30.8, 30.3, 26.4, 26.1, 24.9, 23.0. FT-IR: ν (cm<sup>-1</sup>) 3423, 2927, 2849, 1655, 1602, 1496, 1448. HRMS [EI] calcd for C<sub>14</sub>H<sub>18</sub>O [M]<sup>+</sup> 202.1352, found 202.1362.

### 3. General procedure for synthesis of oxime ethers

#### Method A

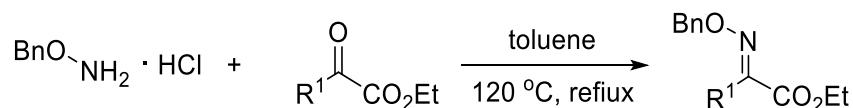

O-Benzylhydroxylamine hydrochloride (1.0 equiv.) was dissolved in toluene, glyoxylic acid ester (1.0 equiv.) was then added. The mixture was heated at refluxing temperature, until the material was consumed. The crude mixture was quenched by sat. NaHCO<sub>3</sub>. The resulting aqueous phase was extracted with CH<sub>2</sub>Cl<sub>2</sub>. The combined organic extracts were washed with brine, dried over MgSO<sub>4</sub>, filtered, and concentrated in vacuum. The residue was purified by column

chromatography on silica gel.

## Method B

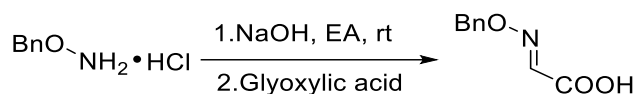

**First step:** O-Benzylhydroxylamine hydrochloride (1.0 equiv.) and NaOH (1.0 equiv.) was dissolved in EtOAc, glyoxylic acid (1.0 equiv.) was then added. The solution was allowed to warm to room temperature over 3 h. The reaction progress was monitored by TLC. The crude mixture was washed with brine, dried over MgSO<sub>4</sub>, filtered, and concentrated in vacuum. The residue was used in the next step without further purification.

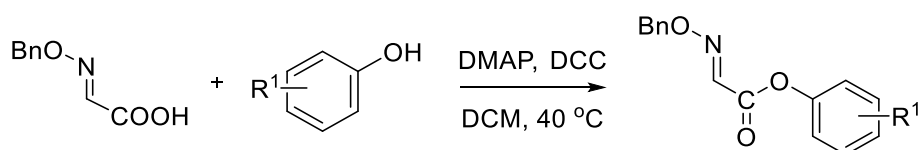

**Second step:** To a stirred solution of *trans*-2-((benzyloxy)imino)acetic acid (2.4 equiv.) and DCC (dicyclohexylcarbodiimide) (2 equiv.) in DCM (15 mL) were added DMAP (4-dimethylaminepyridine) (0.15 equiv.) and phenol (1.0 equiv.). The reaction mixture was stirred at 40 °C until the material was consumed. After filtration, the filtrate was concentrated in vacuum and the residue was purified by flash column chromatography on silica gel to afford the product.

Oxime ethers **2b-f** were synthesized according to **Method B**. Oxime ether **2g** was synthesized according to **Method A**. Oxime ethers **2a** and others are known compounds, the spectrum data can be found in Ref. 2.

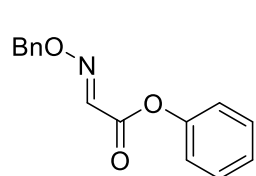

**2b:** white solid, m.p. 60-61 °C. Purification by flash column chromatography on silica gel (eluent: EtOAc/Petroleum ether = 1/20). <sup>1</sup>H NMR (400 MHz, CDCl<sub>3</sub>) δ 7.72 (s, 1H), 7.44-7.36 (m, 7H), 7.29-7.23 (m, 1H), 7.18-7.14 (m, 2H), 5.36 (s, 2H); <sup>13</sup>C NMR (100 MHz, CDCl<sub>3</sub>) δ 160.4, 150.2, 140.6, 135.8, 129.6, 128.7, 128.7, 128.6, 126.3, 121.4, 78.5.

FT-IR: ν (cm<sup>-1</sup>) 2963, 1763, 1600, 1589, 1484, 1455, 1363. HRMS [ESI] calcd for C<sub>15</sub>H<sub>14</sub>NO<sub>3</sub> [M+H]<sup>+</sup> 256.0968, found 256.0967.

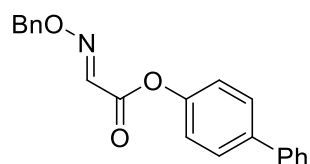

**2c:** yellow solid, m.p. 77-78 °C. Purification by flash column chromatography on silica gel (eluent: EtOAc/Petroleum ether = 1/20). <sup>1</sup>H NMR (400 MHz, CDCl<sub>3</sub>) δ 7.78 (s, 1H), 7.66-7.58 (m, 4H), 7.50-7.36 (m, 8H), 7.30-7.25 (m, 2H), 5.41 (s, 2H); <sup>13</sup>C NMR (100 MHz, CDCl<sub>3</sub>) δ 160.5, 149.6, 140.6, 140.2, 139.5, 135.8, 128.8,

128.7, 128.7, 128.6, 128.3, 127.5, 127.1, 121.7, 78.5. FT-IR: ν (cm<sup>-1</sup>) 2970, 1746, 1597, 1518, 1487, 1454, 1370. HRMS [ESI] calcd for C<sub>21</sub>H<sub>18</sub>NO<sub>3</sub> [M+H]<sup>+</sup> 332.1281, found 332.1278.

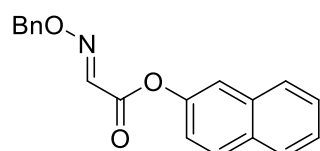

**2d:** yellow oil. Purification by flash column chromatography on silica gel (eluent: EtOAc/Petroleum ether = 1/20). <sup>1</sup>H NMR (400

MHz, CDCl<sub>3</sub>)  $\delta$  7.96-7.89 (m, 2H), 7.89 (s, 1H), 7.80 (d,  $J$  = 8.4 Hz, 1H), 7.57-7.52 (m, 2H), 7.51-7.37 (m, 7H), 5.44 (s, 2H); <sup>13</sup>C NMR (100 MHz, CDCl<sub>3</sub>)  $\delta$  160.5, 146.1, 140.5, 135.9, 134.7, 128.9, 128.7, 128.1, 126.7, 126.7, 126.6, 126.5, 125.4, 121.2, 118.0, 78.6. FT-IR:  $\nu$  (cm<sup>-1</sup>) 2970, 1751, 1595, 1509, 1495, 1453, 1391. HRMS [ESI] calcd for C<sub>19</sub>H<sub>16</sub>NO<sub>3</sub> [M+H]<sup>+</sup> 306.1125, found 306.1117.

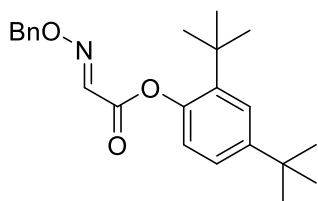

**2e**: white solid, m.p. 60-61 °C. Purification by flash column chromatography on silica gel (eluent: EtOAc/Petroleum ether = 1/20). <sup>1</sup>H NMR (400 MHz, CDCl<sub>3</sub>)  $\delta$  7.73 (s, 1H), 7.44-7.35 (m, 6H), 7.24 (dd,  $J$  = 8.4, 2.4 Hz, 1H), 7.01 (d,  $J$  = 8.8 Hz, 1H), 5.35 (s, 2H), 1.35 (s, 9H), 1.32 (s, 9H); <sup>13</sup>C NMR (100 MHz, CDCl<sub>3</sub>)  $\delta$  160.7, 148.6, 146.2, 140.8, 140.1, 135.9, 128.9, 128.6, 128.6, 124.2, 123.8, 122.8, 78.4, 34.7, 31.5, 30.2. FT-IR:  $\nu$  (cm<sup>-1</sup>) 2961, 1732, 1594, 1495, 1455, 1397, 1364. HRMS [EI] calcd for C<sub>23</sub>H<sub>29</sub>NO<sub>3</sub> [M]<sup>+</sup> 367.2142, found 367.2148.

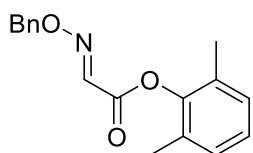

**2f**: white solid, m.p. 90-91 °C. Purification by flash column chromatography on silica gel (eluent: EtOAc/Petroleum ether = 1/20). <sup>1</sup>H NMR (400 MHz, CDCl<sub>3</sub>)  $\delta$  7.77 (s, 1H), 7.46-7.34 (m, 5H), 7.08 (br, 3H), 5.38 (s, 2H), 2.18 (s, 6H); <sup>13</sup>C NMR (100 MHz, CDCl<sub>3</sub>)  $\delta$  159.7, 147.7, 140.2, 135.7, 130.1, 128.8, 128.7, 128.6, 126.3, 78.5, 16.3. FT-IR:  $\nu$  (cm<sup>-1</sup>) 2967, 1792, 1594, 1497, 1475, 1454, 1373. HRMS [ESI] calcd for C<sub>17</sub>H<sub>17</sub>NO<sub>3</sub>Na [M+Na]<sup>+</sup> 306.1101, found 306.1106.

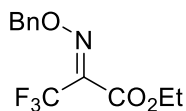

**2g**: Z/E ratio = 1:2.3, yellow oil. Purification by flash column chromatography on silica gel (eluent: EtOAc/Petroleum ether = 1/20). <sup>1</sup>H NMR (400 MHz, CDCl<sub>3</sub>)  $\delta$  7.42-7.32 (m, 5H, two isomers), 5.39 (s, 0.6H, one isomer), 5.30 (s, 1.4H, one isomer), 4.40-4.32 (m, 2H, two isomers), 1.39-1.30 (m, 3H, two isomers); <sup>13</sup>C NMR (100 MHz, CDCl<sub>3</sub>)  $\delta$  157.3 (overlap, two isomers), 140.2 (q,  $J_{C-F}$  = 35.4 Hz) (overlap, two isomers), 135.4 (overlap, two isomers), 128.6 (overlap, two isomers), 128.6 (overlap, two isomers), 128.4 (overlap, two isomers), 118.9 (q,  $J_{C-F}$  = 272.4 Hz) (overlap, two isomers), 79.1 (overlap, two isomers), 62.8 (overlap, two isomers), 13.9 (overlap, two isomers); <sup>19</sup>F NMR (376 MHz, CDCl<sub>3</sub>)  $\delta$  -63.6 (s) & -65.8 (s) (two isomers). FT-IR:  $\nu$  (cm<sup>-1</sup>) 2988, 1746, 1629, 1499, 1456, 1371, 1344, 1258. HRMS [EI] calcd for C<sub>12</sub>H<sub>12</sub>F<sub>3</sub>NO<sub>3</sub> [M]<sup>+</sup> 275.0764, found 275.0761.

#### 4. General procedure for synthesis of products

Cyclopropanol **1** (0.3 mmol, 1.5 equiv.), oxime ether **2** (0.2 mmol, 1.0 equiv.), and MnCl<sub>2</sub> (0.04 mmol, 20 mol %) were loaded in a flame-dried reaction vial, which was subjected to evacuation/ flushing with nitrogen three times. HFIP (3.0 mL) was added to the mixture via syringe. Then acetylacetone (acac, 0.2 mmol, 1.0 equiv.) and AcOH (0.2 mmol, 1.0 equiv.) were added to the mixture, which was stirred at room temperature until the starting material had been consumed as determined by TLC. The mixture was quenched with H<sub>2</sub>O. The aqueous layer was extracted with DCM. The organic layer was washed with brine, dried over Na<sub>2</sub>SO<sub>4</sub>, concentrated in vacuum, and purified by flash column chromatography on silica gel (eluent: EtOAc/Petroleum ether) to give the corresponding products.

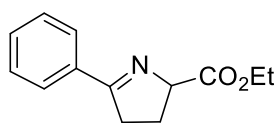

**3a:** 39.5 mg, 91% yield, yellow oil. Purification by flash column chromatography on silica gel (eluent: EtOAc/Petroleum ether = 1/8).  $^1\text{H NMR}$  (400 MHz,  $\text{CDCl}_3$ )  $\delta$  7.89-7.84 (m, 2H), 7.47-7.36 (m, 3H), 4.92-4.85 (m, 1H), 4.23 (q,  $J = 7.2$  Hz, 2H), 3.20-3.09 (m, 1H), 3.02-2.91 (m, 1H), 2.39-2.27 (m, 1H), 2.27-2.16 (m, 1H), 1.30 (t,  $J = 7.2$  Hz, 3H);  $^{13}\text{C NMR}$  (100 MHz,  $\text{CDCl}_3$ )  $\delta$  176.1, 173.0, 133.9, 130.9, 128.4, 128.1, 74.7, 61.1, 35.5, 26.5, 14.2. FT-IR:  $\nu$  ( $\text{cm}^{-1}$ ) 2979, 2159, 1968, 1732, 1653, 1613, 1575, 1507, 1496, 1448. HRMS [ESI] calcd for  $\text{C}_{13}\text{H}_{16}\text{NO}_2$   $[\text{M}+\text{H}]^+$  218.1176, found 218.1175.

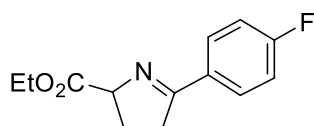

**3b:** 38.1 mg, 81% yield, yellow oil. Purification by flash column chromatography on silica gel (eluent: EtOAc/Petroleum ether = 1/8).  $^1\text{H NMR}$  (400 MHz,  $\text{CDCl}_3$ )  $\delta$  7.91-7.84 (m, 2H), 7.13-7.04 (m, 2H), 4.92-4.85 (m, 1H), 4.23 (q,  $J = 7.2$  Hz, 2H), 3.18-3.06 (m, 1H), 3.01-2.89 (m, 1H), 2.40-2.29 (m, 1H), 2.29-4.2.17 (m, 1H), 1.30 (t,  $J = 7.2$  Hz, 3H);  $^{13}\text{C NMR}$  (100 MHz,  $\text{CDCl}_3$ )  $\delta$  174.9, 172.9, 164.5 (d,  $J_{\text{C-F}} = 249.8$  Hz), 130.2 (d,  $J_{\text{C-F}} = 8.5$  Hz), 130.2 (d,  $J_{\text{C-F}} = 4.1$  Hz), 115.5 (d,  $J_{\text{C-F}} = 21.6$  Hz), 74.6, 61.2, 35.5, 26.5, 14.2;  $^{19}\text{F NMR}$  (376 MHz,  $\text{CDCl}_3$ )  $\delta$  -109.1 (s). FT-IR:  $\nu$  ( $\text{cm}^{-1}$ ) 2974, 2893, 2159, 1976, 1735, 1653, 1636, 1603, 1513, 1457. HRMS [ESI] calcd for  $\text{C}_{13}\text{H}_{14}\text{FNO}_2\text{Na}$   $[\text{M}+\text{Na}]^+$  258.0901, found 258.0903.

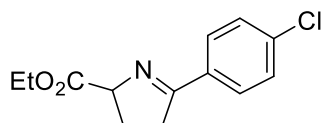

**3c:** 46.2 mg, 92% yield, yellow oil. Purification by flash column chromatography on silica gel (eluent: EtOAc/Petroleum ether = 1/8).  $^1\text{H NMR}$  (400 MHz,  $\text{CDCl}_3$ )  $\delta$  7.84-7.78 (m, 2H), 7.40-7.35 (m, 2H), 4.92-4.85 (m, 1H), 4.24 (q,  $J = 7.2$  Hz, 2H), 3.17-3.06 (m, 1H), 3.00-2.89 (m, 1H), 2.41-2.29 (m, 1H), 2.29-2.18 (m, 1H), 1.31 (t,  $J = 7.2$  Hz, 3H);  $^{13}\text{C NMR}$  (100 MHz,  $\text{CDCl}_3$ )  $\delta$  174.9, 172.8, 137.1, 132.4, 129.4, 128.7, 74.7, 61.2, 35.4, 26.5, 14.2. FT-IR:  $\nu$  ( $\text{cm}^{-1}$ ) 2975, 2897, 2007, 1713, 1616, 1597, 1568, 1492, 1456, 1403. HRMS [ESI] calcd for  $\text{C}_{13}\text{H}_{14}\text{ClNO}_2\text{Na}$   $[\text{M}+\text{Na}]^+$  274.0605, found 274.0594.

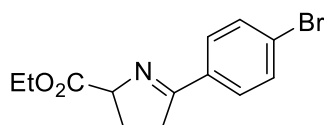

**3d:** 51.3 mg, 87% yield, brown oil. Purification by flash column chromatography on silica gel (eluent: EtOAc/Petroleum ether = 1/8).  $^1\text{H NMR}$  (400 MHz,  $\text{CDCl}_3$ )  $\delta$  7.76-7.70 (m, 2H), 7.56-7.50 (m, 2H), 4.91-4.84 (m, 1H), 4.23 (q,  $J = 7.2$  Hz, 2H), 3.16-3.06 (m, 1H), 3.00-2.89 (m, 1H), 2.40-2.29 (m, 1H), 2.29-2.17 (m, 1H), 1.30 (t,  $J = 7.2$  Hz, 3H);  $^{13}\text{C NMR}$  (100 MHz,  $\text{CDCl}_3$ )  $\delta$  175.1, 172.8, 132.7, 131.7, 129.6, 125.6, 74.7, 61.2, 35.4, 26.5, 14.2. FT-IR:  $\nu$  ( $\text{cm}^{-1}$ ) 2974, 2883, 2159, 1971, 1735, 1653, 1636, 1591, 1488, 1457. HRMS [ESI] calcd for  $\text{C}_{13}\text{H}_{14}\text{BrNO}_2\text{Na}$   $[\text{M}+\text{Na}]^+$  318.0100, found 318.0094.

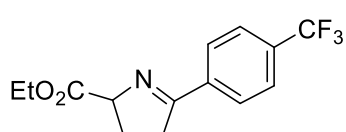

**3e:** 50.7 mg, 89% yield, yellow solid, m.p. 77-78 °C. Purification by flash column chromatography on silica gel (eluent: EtOAc/Petroleum ether = 1/8).  $^1\text{H NMR}$  (400 MHz,  $\text{CDCl}_3$ )  $\delta$  8.01-7.95 (m, 2H), 7.68-7.63 (m, 2H), 4.96-4.89 (m, 1H), 4.24 (q,  $J = 7.2$  Hz, 2H), 3.21-3.11 (m, 1H), 3.05-2.94 (m, 1H), 2.43-2.32 (m, 1H), 2.32-2.21 (m, 1H), 1.31 (t,  $J = 7.2$  Hz, 3H);  $^{13}\text{C NMR}$  (100 MHz,  $\text{CDCl}_3$ )  $\delta$  175.0, 172.6, 137.0, 132.5 (q,  $J_{\text{C-F}} = 32.1$  Hz),

128.4, 125.4 (q,  $J_{C-F} = 3.5$  Hz), 123.9 (q,  $J_{C-F} = 271.0$  Hz), 74.8, 61.3, 35.5, 26.4, 14.2;  $^{19}\text{F}$  NMR (376 MHz,  $\text{CDCl}_3$ )  $\delta$  -62.9 (s). FT-IR:  $\nu$  ( $\text{cm}^{-1}$ ) 2975, 2883, 2159, 2009, 1731, 1647, 1618, 1575, 1519, 1455. HRMS [ESI] calcd for  $\text{C}_{14}\text{H}_{14}\text{F}_3\text{NO}_2\text{Na}$  [ $\text{M}+\text{Na}$ ] $^+$  308.0869, found 308.0869.

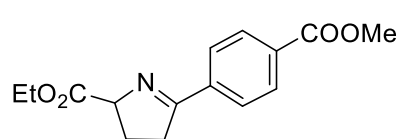

**3f**: 44.0 mg, 80% yield, yellow solid, m.p. 89-90 °C. Purification by flash column chromatography on silica gel (eluent: EtOAc/Petroleum ether = 1/8).  $^1\text{H}$  NMR (400 MHz,  $\text{CDCl}_3$ )  $\delta$  8.09-8.04 (m, 2H), 7.96-7.91 (m, 2H), 4.95-4.89 (m, 1H), 4.24 (q,  $J = 7.2$  Hz, 2H), 3.92 (s, 3H), 3.22-3.11 (m, 1H), 3.05-2.94 (m, 1H), 2.42-2.31 (m, 1H), 2.31-2.20 (m, 1H), 1.31 (t,  $J = 7.2$  Hz, 3H);  $^{13}\text{C}$  NMR (100 MHz,  $\text{CDCl}_3$ )  $\delta$  175.4, 172.7, 166.6, 137.8, 132.1, 129.7, 128.0, 74.9, 61.3, 52.3, 35.6, 26.5, 14.2. FT-IR:  $\nu$  ( $\text{cm}^{-1}$ ) 2985, 2949, 2850, 2159, 2030, 1735, 1653, 1636, 1507, 1441. HRMS [ESI] calcd for  $\text{C}_{15}\text{H}_{17}\text{NO}_4\text{Na}$  [ $\text{M}+\text{Na}$ ] $^+$  298.1050, found 298.1044.

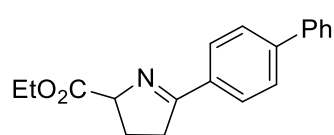

**3g**: 44.6 mg, 76% yield, yellow solid, m.p. 109-110 °C. Purification by flash column chromatography on silica gel (eluent: EtOAc/Petroleum ether = 1/8).  $^1\text{H}$  NMR (400 MHz,  $\text{CDCl}_3$ )  $\delta$  7.98-7.92 (m, 2H), 7.67-7.59 (m, 4H), 7.48-7.42 (m, 2H), 7.40-7.34 (m, 1H), 4.96-4.89 (m, 1H), 4.25 (q,  $J = 7.2$  Hz, 2H), 3.24-3.13 (m, 1H), 3.06-2.96 (m, 1H), 2.43-2.33 (m, 1H), 2.33-2.20 (m, 1H), 1.32 (t,  $J = 7.2$  Hz, 3H);  $^{13}\text{C}$  NMR (100 MHz,  $\text{CDCl}_3$ )  $\delta$  175.7, 173.0, 143.6, 140.3, 132.8, 128.9, 128.6, 127.8, 127.1, 127.1, 74.7, 61.2, 35.5, 26.5, 14.3. FT-IR:  $\nu$  ( $\text{cm}^{-1}$ ) 3034, 2977, 2931, 2159, 1725, 1604, 1580, 1487, 1459, 1405. HRMS [ESI] calcd for  $\text{C}_{19}\text{H}_{20}\text{NO}_2$  [ $\text{M}+\text{H}$ ] $^+$  294.1489, found 294.1477.

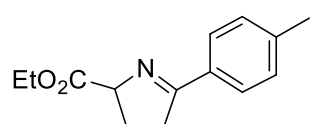

**3h**: 28.6 mg, 62% yield, yellow oil. Purification by flash column chromatography on silica gel (eluent: EtOAc/Petroleum ether = 1/8).  $^1\text{H}$  NMR (400 MHz,  $\text{CDCl}_3$ )  $\delta$  7.80-7.74 (m, 2H), 7.24-7.18 (m, 2H), 4.91-4.85 (m, 1H), 4.23 (q,  $J = 7.2$  Hz, 2H), 3.19-3.08 (m, 1H), 3.01-2.91 (m, 1H), 2.38 (s, 3H), 2.37-2.28 (m, 1H), 2.27-2.16 (m, 1H), 1.31 (t,  $J = 7.2$  Hz, 3H);  $^{13}\text{C}$  NMR (100 MHz,  $\text{CDCl}_3$ )  $\delta$  175.9, 173.1, 141.2, 131.2, 129.1, 128.0, 74.6, 61.1, 35.4, 26.5, 21.5, 14.2. FT-IR:  $\nu$  ( $\text{cm}^{-1}$ ) 2982, 2919, 2156, 2022, 1747, 1713, 1614, 1564, 1509, 1445, 1427. HRMS [ESI] calcd for  $\text{C}_{14}\text{H}_{18}\text{NO}_2$  [ $\text{M}+\text{H}$ ] $^+$  232.1332, found 232.1322.

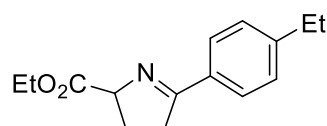

**3i**: 44.6 mg, 91% yield, yellow oil. Purification by flash column chromatography on silica gel (eluent: EtOAc/Petroleum ether = 1/8).  $^1\text{H}$  NMR (400 MHz,  $\text{CDCl}_3$ )  $\delta$  7.82-7.76 (m, 2H), 7.25-7.20 (m, 2H), 4.91-4.84 (m, 1H), 4.22 (q,  $J = 7.2$  Hz, 2H), 3.18-3.08 (m, 1H), 3.01-2.90 (m, 1H), 2.67 (q,  $J = 7.6$  Hz, 2H), 2.38-2.26 (m, 1H), 2.26-2.15 (m, 1H), 1.30 (t,  $J = 7.2$  Hz, 3H), 1.23 (t,  $J = 7.6$  Hz, 3H);  $^{13}\text{C}$  NMR (100 MHz,  $\text{CDCl}_3$ )  $\delta$  175.9, 173.1, 147.5, 131.4, 128.2, 127.9, 74.6, 61.1, 35.4, 28.8, 26.5, 15.4, 14.2. FT-IR:  $\nu$  ( $\text{cm}^{-1}$ ) 2970, 2934, 2874, 2159, 2024, 1734, 1653, 1610, 1509, 1457. HRMS [ESI] calcd for  $\text{C}_{15}\text{H}_{19}\text{NO}_2\text{Na}$  [ $\text{M}+\text{Na}$ ] $^+$  268.1308, found 268.1299.

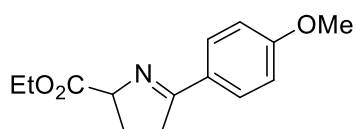

**3j:** 39.5 mg, 80% yield, yellow solid, m.p. 40-41 °C. Purification by flash column chromatography on silica gel (eluent: EtOAc/Petroleum ether = 1/8). <sup>1</sup>H NMR (400 MHz, CDCl<sub>3</sub>) δ 7.85-7.80 (m, 2H), 6.93-6.88 (m, 2H), 4.89-4.82 (m, 1H), 4.22 (q, *J* = 7.2 Hz, 2H), 3.83 (s, 3H), 3.16-3.06 (m, 1H), 2.99-2.89 (m, 1H), 2.38-2.27 (m, 1H), 2.25-2.14 (m, 1H), 1.30 (t, *J* = 7.2 Hz, 3H); <sup>13</sup>C NMR (100 MHz, CDCl<sub>3</sub>) δ 175.4, 173.2, 161.8, 129.8, 126.6, 113.7, 74.4, 61.1, 55.3, 35.4, 26.5, 14.2. FT-IR: ν (cm<sup>-1</sup>) 3021, 2975, 2927, 2159, 2040, 1736, 1653, 1636, 1514, 1456. HRMS [ESI] calcd for C<sub>14</sub>H<sub>17</sub>NO<sub>3</sub>Na [M+Na]<sup>+</sup> 270.1101, found 270.1090.

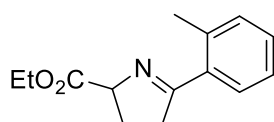

**3k:** 41.6 mg, 90% yield, yellow oil. Purification by flash column chromatography on silica gel (eluent: EtOAc/Petroleum ether = 1/8). <sup>1</sup>H NMR (400 MHz, CDCl<sub>3</sub>) δ 7.43 (d, *J* = 7.6 Hz, 1H), 7.30-7.17 (m, 3H), 4.97-4.90 (m, 1H), 4.23 (q, *J* = 7.2 Hz, 2H), 3.12-2.92 (m, 2H), 2.52 (s, 3H), 2.37-2.25 (m, 1H), 2.24-2.13 (m, 1H), 1.30 (t, *J* = 7.2 Hz, 3H); <sup>13</sup>C NMR (100 MHz, CDCl<sub>3</sub>) δ 178.1, 173.0, 137.5, 134.3, 131.3, 129.4, 128.9, 125.5, 75.1, 61.0, 38.8, 26.5, 21.4, 14.2. FT-IR: ν (cm<sup>-1</sup>) 2975, 2929, 2893, 2159, 1976, 1735, 1653, 1636, 1507, 1457. HRMS [ESI] calcd for C<sub>14</sub>H<sub>18</sub>NO<sub>2</sub> [M+H]<sup>+</sup> 232.1332, found 232.1322.

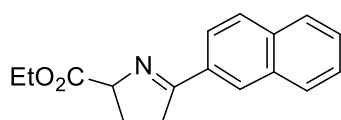

**3l:** 25.6 mg, 48% yield, yellow solid, m.p. 86-87 °C. Purification by flash column chromatography (eluent: EtOAc/Petroleum ether = 1/8). <sup>1</sup>H NMR (400 MHz, CDCl<sub>3</sub>) δ 8.22 (s, 1H), 8.12 (dd, *J* = 8.4, 1.6 Hz, 1H), 7.91-7.83 (m, 3H), 7.56-7.48 (m, 2H), 4.99-4.93 (m, 1H), 4.26 (q, *J* = 7.2 Hz, 2H), 3.33-3.23 (m, 1H), 3.15-3.05 (m, 1H), 2.45-2.34 (m, 1H), 2.34-2.23 (m, 1H), 1.33 (t, *J* = 7.2 Hz, 3H); <sup>13</sup>C NMR (100 MHz, CDCl<sub>3</sub>) δ 176.0, 173.0, 134.6, 132.9, 131.4, 128.8, 128.8, 128.2, 127.8, 127.3, 126.5, 124.8, 74.8, 61.2, 35.5, 26.6, 14.3. FT-IR: ν (cm<sup>-1</sup>) 2979, 2935, 2159, 1969, 1733, 1653, 1609, 1572, 1487, 1455. HRMS [ESI] calcd for C<sub>17</sub>H<sub>17</sub>NO<sub>2</sub>Na [M+Na]<sup>+</sup> 290.1151, found 290.1160.

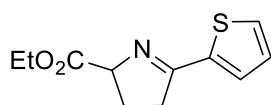

**3m:** 28.6 mg, 64% yield, yellow oil, Purification by flash column chromatography on silica gel (eluent: EtOAc/Petroleum ether = 1/8). <sup>1</sup>H NMR (400 MHz, CDCl<sub>3</sub>) δ 7.46 (d, *J* = 5.2 Hz, 1H), 7.40 (d, *J* = 3.2 Hz, 1H), 7.12-7.05 (m, 1H), 4.91-4.83 (m, 1H), 4.23 (q, *J* = 7.2 Hz, 2H), 3.20-3.09 (m, 1H), 3.05-2.93 (m, 1H), 2.41-2.19 (m, 2H), 1.30 (t, *J* = 7.2 Hz, 3H); <sup>13</sup>C NMR (100 MHz, CDCl<sub>3</sub>) δ 172.8, 170.4, 138.6, 130.2, 130.0, 127.5, 74.4, 61.1, 36.1, 26.9, 14.2. FT-IR: ν (cm<sup>-1</sup>) 3068, 2978, 2920, 2850, 1734, 1660, 1632, 1608, 1522, 1469, 1454. HRMS [ESI] calcd for C<sub>11</sub>H<sub>14</sub>NO<sub>2</sub>S [M+H]<sup>+</sup> 224.0740, found 224.0742.

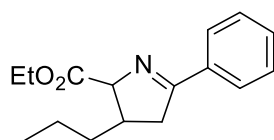

**3n:** *d.r.* = 1:2.3, 45.6 mg, 88% yield, yellow oil. Purification by flash column chromatography on silica gel (eluent: EtOAc/Petroleum ether = 1/8). <sup>1</sup>H NMR (400 MHz, CDCl<sub>3</sub>) δ 7.90-7.84 (m, 2H, two isomers), 7.48-7.37 (m, 3H, two isomers), 4.93 (d, *J* = 8.0 Hz, 0.3H, one isomer), 4.53-4.49 (m, 0.7H, one isomer), 4.27-4.19 (m, 2H, two isomers), 3.35-3.25 (m, 0.7H, one isomer), 3.15-3.05 (m, 0.3H, one isomer), 2.84-2.56 (m, 2H, two isomers), 1.68-1.58 (m, 1H, two isomers),



1.54-1.34 (m, 3H, two isomers), 1.34-1.26 (m, 3H, two isomers), 0.98-0.90 (m, 3H, two isomers);  $^{13}\text{C}$  NMR (100 MHz,  $\text{CDCl}_3$ )  $\delta$  177.0 & 175.6 (two isomers), 172.9 & 171.2 (two isomers), 134.1 & 134.0 (two isomers), 131.0 & 130.9 (two isomers), 128.5 & 128.4 (two isomers), 128.0 (overlap, two isomers), 80.0 & 76.9 (two isomers), 61.1 & 60.7 (two isomers), 41.8 & 40.5 (two isomers), 41.2 & 41.2 (two isomers), 37.2 & 32.5 (two isomers), 21.9 & 21.1 (two isomers), 14.3 & 14.2 (two isomers). 14.1 & 14.0 (two isomers). FT-IR:  $\nu$  ( $\text{cm}^{-1}$ ) 2974, 2929, 2160, 1977, 1735, 1653, 1636, 1577, 1507, 1457. HRMS [ESI] calcd for  $\text{C}_{16}\text{H}_{21}\text{NO}_2\text{Na}$   $[\text{M}+\text{Na}]^+$  282.1465, found 282.1454.

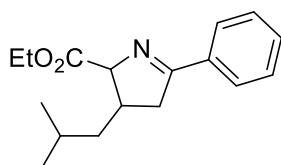

**3o:** *d.r.* = 1:2.3, 50.8 mg, 93% yield, yellow oil. Purification by flash column chromatography on silica gel (eluent: EtOAc/Petroleum ether = 1/8).  $^1\text{H}$  NMR (400 MHz,  $\text{CDCl}_3$ )  $\delta$  7.89-7.84 (m, 2H, two isomers), 7.49-7.37 (m, 3H, two isomers), 4.95-4.89 (m, 0.3H, one isomer), 4.52-4.46 (m, 0.7H, one isomer), 4.29-4.16 (m, 2H, two isomers), 3.36-3.24 (m, 0.7H, one isomer), 3.15-3.04 (m, 0.3H, one isomer), 2.84-2.59 (m, 2H, two isomers), 1.74-1.60 (m, 1.3H, two isomers), 1.56-1.47 (m, 0.7H, one isomer), 1.41-1.33 (m, 1H, two isomers), 1.31 (t,  $J$  = 7.2 Hz, 3H, two isomers), 0.97-0.90 (m, 6H, two isomers);  $^{13}\text{C}$  NMR (100 MHz,  $\text{CDCl}_3$ )  $\delta$  177.1 & 175.5 (two isomers), 172.9 & 171.2 (two isomers), 134.2 & 134.0 (two isomers), 130.9 & 130.9 (two isomers), 128.4 & 128.4 (two isomers), 128.0 & 127.9 (two isomers), 81.3 & 77.1 (two isomers), 61.0 & 60.7 (two isomers), 44.4 & 42.1 (two isomers), 40.6 & 39.5 (two isomers), 39.3 & 39.3 (two isomers), 27.1 & 26.6 (two isomers), 23.4 & 22.9 (two isomers), 22.3 & 21.9 (two isomers), 14.3 & 14.2 (two isomers). FT-IR:  $\nu$  ( $\text{cm}^{-1}$ ) 2974, 2928, 2893, 2159, 1969, 1735, 1653, 1636, 1512, 1507, 1457. HRMS [ESI] calcd for  $\text{C}_{17}\text{H}_{23}\text{NO}_2\text{Na}$   $[\text{M}+\text{Na}]^+$  296.1621, found 296.1624.

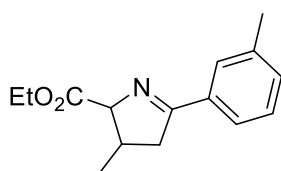

**3p:** *d.r.* = 1:1.5, 42.6 mg, 87% yield, yellow oil. Purification by flash column chromatography on silica gel (eluent: EtOAc/Petroleum ether = 1/8).  $^1\text{H}$  NMR (400 MHz,  $\text{CDCl}_3$ )  $\delta$  7.78-7.73 (m, 1H, two isomers), 7.64-7.58 (m, 1H, two isomers), 7.33-7.24 (m, 2H, two isomers), 4.86 (d,  $J$  = 8.0 Hz, 0.6H, one isomer), 4.45-4.41 (m, 0.4H, one isomer), 4.32-4.15 (m, 2H, two isomers), 3.36-3.27 (m, 0.4H, one isomer), 3.17-3.08 (m, 0.6H, one isomer), 2.92-2.82 (m, 0.6H, one isomer), 2.80-2.72 (m, 0.6H, one isomer), 2.72-2.57 (m, 0.8H, two isomers), 2.38 (s, 3H, two isomers), 1.34-1.27 (m, 3H, two isomers), 1.24 (d,  $J$  = 6.4 Hz, 1.2H, one isomer), 1.05 (d,  $J$  = 6.8 Hz, 1.8H, one isomer);  $^{13}\text{C}$  NMR (100 MHz,  $\text{CDCl}_3$ )  $\delta$  176.5 & 175.8 (two isomers), 172.8 & 171.3 (two isomers), 138.1 (overlap, two isomers), 134.0 & 133.9 (two isomers), 131.7 (overlap, two isomers), 128.4 & 128.4 (two isomers), 128.3 (overlap, two isomers), 125.2 & 125.2 (two isomers), 81.4 (overlap, two isomers), 61.0 & 60.7 (two isomers), 43.7 & 43.1 (two isomers), 36.2 & 35.0 (two isomers), 21.3 & 20.0 (two isomers), 15.8 (overlap, two isomers), 14.4 & 14.3 (two isomers). FT-IR:  $\nu$  ( $\text{cm}^{-1}$ ) 2974, 2929, 2893, 2159, 1976, 1735, 1653, 1636, 1617, 1507, 1457. HRMS [ESI] calcd for  $\text{C}_{15}\text{H}_{19}\text{NO}_2\text{Na}$   $[\text{M}+\text{Na}]^+$  268.1308, found 268.1310.

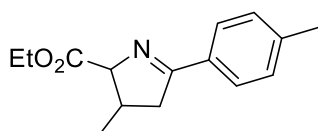

**3q:** *d.r.* = 1:1.5, 31.3 mg, 64% yield, yellow oil. Purification by flash column chromatography on silica gel (eluent: EtOAc/Petroleum ether = 1/8).  $^1\text{H}$  NMR (400 MHz,  $\text{CDCl}_3$ )  $\delta$

7.78-7.72 (m, 2H, two isomers), 7.23-7.18 (m, 2H, two isomers), 4.88-4.83 (m, 0.4H, one isomer), 4.44-4.40 (m, 0.6H, one isomer), 4.32-4.15 (m, 2H, two isomers), 3.30 (ddd,  $J = 16.4, 8.0, 1.6$  Hz, 0.6H, one isomer), 3.11 (ddd,  $J = 16.0, 8.0, 1.2$  Hz, 0.4H, one isomer), 2.91-2.79 (m, 0.4H, one isomer), 2.78-2.70 (m, 0.4H, one isomer), 2.70-2.63 (m, 0.6H, one isomer), 2.63-2.55 (m, 0.6H, one isomer), 2.38 (s, 3H, two isomers), 1.30 (t,  $J = 7.2$  Hz, 1.8H, one isomer), 1.29 (t,  $J = 7.2$  Hz, 1.2H, one isomer), 1.23 (d,  $J = 6.8$  Hz, 1.8H, one isomer), 1.05 (d,  $J = 6.8$  Hz, 1.2H, one isomer);  $^{13}\text{C}$  NMR (100 MHz,  $\text{CDCl}_3$ )  $\delta$  176.1 & 175.4 (two isomers), 172.8 & 171.4 (two isomers), 141.2 (overlap, two isomers), 131.5 & 131.4 (two isomers), 129.1 (overlap, two isomers), 128.0 & 127.9 (two isomers), 81.3 & 77.4 (two isomers), 61.0 & 60.6 (two isomers), 43.6 & 43.1 (two isomers), 36.2 & 35.0 (two isomers), 21.5 & 20.0 (two isomers), 15.8 (overlap, two isomers), 14.4 & 14.2 (two isomers). FT-IR:  $\nu$  ( $\text{cm}^{-1}$ ) 2974, 2928, 2893, 2159, 1969, 1735, 1653, 1636, 1512, 1507, 1457. HRMS [ESI] calcd for  $\text{C}_{15}\text{H}_{19}\text{NO}_2\text{Na}$  [ $\text{M}+\text{Na}$ ] $^+$  268.1308, found 268.1304.

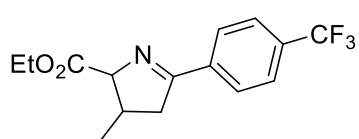

**3r:** *d.r.* = 1:1.5, 51.4 mg, 86% yield, yellow oil. Purification by flash column chromatography on silica gel (eluent: EtOAc/Petroleum ether = 1/8).  $^1\text{H}$  NMR (400 MHz,  $\text{CDCl}_3$ )  $\delta$  8.00-7.95 (m, 2H, two isomers), 7.70-7.64 (m, 2H, two isomers), 4.93-4.89 (m, 0.4H, one isomer), 4.49-4.45 (m, 0.6H, one isomer), 4.32-4.17 (m, 2H, two isomers), 3.33 (ddd,  $J = 16.8, 8.8, 2.0$  Hz, 0.6H, one isomer), 3.15 (ddd,  $J = 16.8, 8.4, 1.6$  Hz, 0.4H, one isomer), 2.97-2.85 (m, 0.4H, one isomer), 2.81-2.74 (m, 0.4H, one isomer), 2.74-2.67 (m, 0.6H, one isomer), 2.67-2.59 (m, 0.6H, one isomer), 1.32 (t,  $J = 7.2$  Hz, 1.8H, one isomer), 1.31 (t,  $J = 7.2$  Hz, 1.2H, one isomer), 1.26 (d,  $J = 6.8$  Hz, 1.8H, one isomer), 1.07 (d,  $J = 7.2$  Hz, 1.2H, one isomer);  $^{13}\text{C}$  NMR (100 MHz,  $\text{CDCl}_3$ )  $\delta$  175.2 & 174.4 (two isomers), 172.4 & 170.9 (two isomers), 137.2 & 137.2 (two isomers), 132.5 (q,  $J_{\text{C-F}} = 32.2$  Hz) (overlap, two isomers), 128.3 & 128.3 (two isomers), 125.4 (q,  $J_{\text{C-F}} = 3.6$  Hz) (overlap, two isomers), 123.9 (q,  $J_{\text{C-F}} = 270.7$  Hz) (overlap, two isomers), 81.5 & 77.6 (two isomers), 61.2 & 60.8 (two isomers), 43.7 & 43.1 (two isomers), 36.3 & 35.1 (two isomers), 19.9 & 15.7 (two isomers), 14.3 & 14.2 (two isomers);  $^{19}\text{F}$  NMR (376 MHz,  $\text{CDCl}_3$ )  $\delta$  -62.9 (s) (overlap, two isomers). FT-IR:  $\nu$  ( $\text{cm}^{-1}$ ) 2973, 2927, 2881, 2161, 2023, 1743, 1713, 1618, 1413, 1374. HRMS [ESI] calcd for  $\text{C}_{15}\text{H}_{17}\text{F}_3\text{NO}_2$  [ $\text{M}+\text{H}$ ] $^+$  300.1206, found 300.1207.

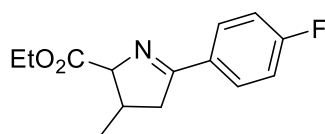

**3s:** *d.r.* = 1:1, 43.3 mg, 87% yield, yellow oil. Purification by flash column chromatography on silica gel (eluent: EtOAc/Petroleum ether = 1/8).  $^1\text{H}$  NMR (400 MHz,  $\text{CDCl}_3$ )  $\delta$  7.90-7.82 (m, 2H, two isomers), 7.12-7.04 (m, 2H, two isomers), 4.88-4.83 (m, 0.5H, one isomer), 4.44-4.39 (m, 0.5H, one isomer), 4.30-4.15 (m, 2H, two isomers), 3.29 (ddd,  $J = 16.8, 8.8, 2.0$  Hz, 0.5H, one isomer), 3.10 (ddd,  $J = 16.4, 8.4, 1.2$  Hz, 0.5H, one isomer), 2.92-2.80 (m, 0.5H, one isomer), 2.77-2.62 (m, 1H, two isomers), 2.62-2.54 (m, 0.5H, one isomer), 1.30 (t,  $J = 7.2$  Hz, 1.5H, one isomer), 1.29 (t,  $J = 7.2$  Hz, 1.5H, one isomer), 1.24 (d,  $J = 6.8$  Hz, 1.5H, one isomer), 1.05 (d,  $J = 6.8$  Hz, 1.5H, one isomer);  $^{13}\text{C}$  NMR (100 MHz,  $\text{CDCl}_3$ )  $\delta$  175.0 & 174.3 (two isomers), 172.7 & 171.2 (two isomers), 164.5 (d,  $J_{\text{C-F}} = 249.5$  Hz) & 164.5 (d,  $J_{\text{C-F}} = 249.9$  Hz) (two isomers), 130.4 (d,  $J_{\text{C-F}} = 3.1$  Hz) & 130.3 (d,  $J_{\text{C-F}} = 3.2$  Hz) (two isomers), 130.1 (d,  $J_{\text{C-F}} = 8.5$  Hz) & 130.0 (d,  $J_{\text{C-F}} = 8.7$  Hz) (two isomers), 115.5 (d,  $J_{\text{C-F}} = 21.7$  Hz) (overlap, two isomers), 81.3 & 77.4 (two isomers), 61.1 & 60.7 (two isomers), 43.6 & 43.1 (two isomers), 36.4 & 35.2

(two isomers), 19.9 & 15.8 (two isomers), 14.4 & 14.2 (two isomers);  $^{19}\text{F}$  NMR (376 MHz,  $\text{CDCl}_3$ )  $\delta$  -109.2 (s) & -109.2 (s) (two isomers). FT-IR:  $\nu$  ( $\text{cm}^{-1}$ ) 2976, 2936, 2159, 1975, 1774, 1653, 1636, 1603, 1510, 1457. HRMS [EI] calcd for  $\text{C}_{14}\text{H}_{16}\text{FNO}_2$  [ $\text{M}$ ] $^+$  249.1160, found 249.1159.

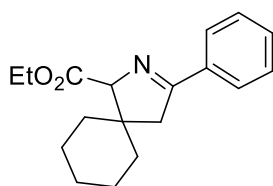

**3t:** 14.2 mg, 25% yield, yellow oil. Purification by flash column chromatography on silica gel (eluent: EtOAc/Petroleum ether = 1/8).  $^1\text{H}$  NMR (400 MHz,  $\text{CDCl}_3$ )  $\delta$  7.91-7.85 (m, 2H), 7.48-7.38 (m, 3H), 4.55 (s, 1H), 4.29-4.15 (m, 2H), 2.99 (d,  $J$  = 16.8 Hz, 1H), 2.86 (d,  $J$  = 16.8 Hz, 1H), 1.72-1.47 (m, 7H), 1.46-1.35 (m, 3H), 1.30 (t,  $J$  = 7.2 Hz, 3H);  $^{13}\text{C}$  NMR (100 MHz,  $\text{CDCl}_3$ )  $\delta$  175.7, 171.2, 134.4, 130.9, 128.4, 127.9, 83.5, 60.7, 46.7, 45.7, 37.5, 32.5, 25.8, 23.7, 23.4, 14.4. FT-IR:  $\nu$  ( $\text{cm}^{-1}$ ) 2970, 2929, 2894, 2159, 1976, 1734, 1653, 1636, 1576, 1507, 1456. HRMS [ESI] calcd for  $\text{C}_{18}\text{H}_{23}\text{NO}_2\text{Na}$  [ $\text{M}+\text{Na}$ ] $^+$  308.1621, found 308.1628.

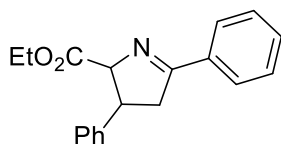

**3u:** *d.r.* = 1:2.3, 31.1 mg, 53% yield, yellow oil. Purification by flash column chromatography on silica gel (eluent: EtOAc/Petroleum ether = 1/8).  $^1\text{H}$  NMR (400 MHz,  $\text{CDCl}_3$ )  $\delta$  7.99-7.95 (m, 1.4H, one isomer), 7.94-7.90 (m, 0.6H, one isomer), 7.52-7.42 (m, 3H, two isomers), 7.35-7.29 (m, 1H, two isomers), 7.25-7.22 (m, 2H, two isomers), 7.21-7.17 (m, 2H, two isomers), 5.25-5.20 (m, 0.7H, one isomer), 4.96-4.92 (m, 0.3H, one isomer), 4.29-4.21 (m, 0.6H, one isomer), 4.02 (q,  $J$  = 8.4 Hz, 0.7H, one isomer), 3.92-3.77 (m, 1H, two isomers), 3.74-3.62 (m, 1H, two isomers), 3.46-3.41 (m, 1.4H, one isomer), 3.18 (ddd,  $J$  = 17.2, 6.4, 1.2 Hz, 0.3H, one isomer), 1.30 (t,  $J$  = 7.2 Hz, 0.9H, one isomer), 0.85 (t,  $J$  = 7.2 Hz, 2.1H, one isomer);  $^{13}\text{C}$  NMR (75 MHz,  $\text{CDCl}_3$ )  $\delta$  176.3 & 175.0 (two isomers), 172.2 & 170.4 (overlap, two isomers), 143.3 & 139.9 (two isomers), 133.8 & 133.6 (two isomers), 131.2 & 131.2 (two isomers), 128.9 & 128.6 (two isomers), 128.5 & 128.3 (two isomers), 128.1 (overlap, two isomers), 127.8 & 127.1 (two isomers), 127.1 & 126.9 (two isomers), 82.7 & 79.2 (two isomers), 61.3 & 60.5 (two isomers), 46.6 & 46.4 (two isomers), 44.7 & 42.1 (two isomers), 14.2 & 13.7 (two isomers). FT-IR:  $\nu$  ( $\text{cm}^{-1}$ ) 3058, 2973, 2929, 2159, 1977, 1734, 1653, 1636, 1576, 1507, 1456. HRMS [ESI] calcd for  $\text{C}_{19}\text{H}_{19}\text{NO}_2\text{Na}$  [ $\text{M}+\text{Na}$ ] $^+$  316.1308, found 316.1304.

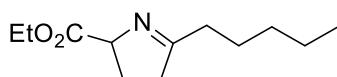

**3v:** 32.1 mg, 76% yield, yellow oil. Purification by flash column chromatography on silica gel (eluent: EtOAc/Petroleum ether = 1/8).  $^1\text{H}$  NMR (400 MHz,  $\text{CDCl}_3$ )  $\delta$  4.66-4.59 (m, 1H), 4.18 (q,  $J$  = 7.2 Hz, 2H), 2.68-2.58 (m, 1H), 2.54-2.44 (m, 1H), 2.40-2.34 (m, 2H), 2.20-2.10 (m, 1H), 2.07-1.97 (m, 1H), 1.63-1.54 (m, 2H), 1.33-1.24 (m, 4H), 1.26 (t,  $J$  = 7.2 Hz, 3H), 0.89-0.84 (m, 3H);  $^{13}\text{C}$  NMR (100 MHz,  $\text{CDCl}_3$ )  $\delta$  182.1, 173.2, 74.0, 60.9, 37.5, 33.8, 31.6, 26.4, 26.1, 22.4, 14.2, 14.0. FT-IR:  $\nu$  ( $\text{cm}^{-1}$ ) 2973, 2931, 2159, 2029, 1737, 1670, 1638, 1559, 1507, 1457. HRMS [ESI] calcd for  $\text{C}_{12}\text{H}_{21}\text{NO}_2\text{Na}$  [ $\text{M}+\text{Na}$ ] $^+$  234.1465, found 234.1475.

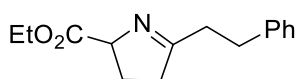

**3w:** 42.1 mg, 86% yield, yellow oil. Purification by flash column chromatography on silica gel (eluent: EtOAc/Petroleum ether = 1/1).  $^1\text{H}$  NMR (400 MHz,  $\text{CDCl}_3$ )  $\delta$  7.31-7.25 (m, 2H), 7.23-7.16 (m, 3H), 4.72-4.63 (m, 1H), 4.21 (q,  $J$  = 7.2 Hz, 2H), 3.01-2.91 (m, 2H), 2.76-2.58 (m, 3H), 2.56-2.43 (m,

1H), 2.24-2.11 (m, 1H), 2.10-1.99 (m, 1H), 1.29 (t,  $J = 7.2$  Hz, 3H);  $^{13}\text{C}$  NMR (100 MHz,  $\text{CDCl}_3$ )  $\delta$  181.4, 173.0, 141.1, 128.5, 128.3, 126.1, 73.9, 61.0, 38.1, 35.3, 32.6, 26.3, 14.2. FT-IR:  $\nu$  ( $\text{cm}^{-1}$ ) 3027, 2980, 2957, 2930, 2872, 1734, 1640, 1604, 1454. HRMS [EI] calcd for  $\text{C}_{15}\text{H}_{19}\text{NO}_2$  [ $\text{M}$ ] $^+$  245.1410, found 245.1412.

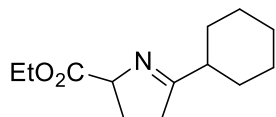

**3x:** 38.8 mg, 87% yield, yellow oil. Purification by flash column chromatography on silica gel (eluent: EtOAc/Petroleum ether = 1/2).  $^1\text{H}$  NMR (400 MHz,  $\text{CDCl}_3$ )  $\delta$  4.66-4.58 (m, 1H), 4.17 (q,  $J = 7.2$  Hz, 2H), 2.70-2.58 (m, 1H), 2.56-2.32 (m, 2H), 2.19-2.06 (m, 1H), 2.05-1.93 (m, 1H), 1.90-1.62 (m, 5H), 1.42-1.22 (m, 5H), 1.26 (t,  $J = 7.2$  Hz, 3H);  $^{13}\text{C}$  NMR (100 MHz,  $\text{CDCl}_3$ )  $\delta$  185.6, 173.2, 73.7, 60.9, 42.5, 35.3, 30.4, 30.4, 26.1, 26.0, 25.9, 14.2. FT-IR:  $\nu$  ( $\text{cm}^{-1}$ ) 2979, 2928, 2854, 1735, 1633, 1449, 1429. HRMS [EI] calcd for  $\text{C}_{13}\text{H}_{21}\text{NO}_2$  [ $\text{M}$ ] $^+$  223.1567, found 223.1568.

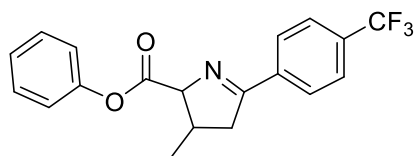

**3y:** *d.r.* = 1:6.7, 27.8 mg, 40% yield, yellow oil. Purification by flash column chromatography on silica gel (eluent: Acetone/Petroleum ether = 1/5).  $^1\text{H}$  NMR (400 MHz,  $\text{CDCl}_3$ )  $\delta$  8.05-7.97 (m, 2H, two isomers), 7.74-7.66 (m, 2H, two isomers), 7.44-7.34 (m, 2H, two isomers), 7.25-7.21 (m, 1H, two isomers), 7.19-7.12 (m, 2H, two isomers), 5.17 (d,  $J = 8.4$  Hz, 0.13H, one isomer), 4.74 (d, 0.87H,  $J = 6.0$  Hz, one isomer), 3.47-3.36 (m, 0.87H, one isomer), 3.29-3.20 (m, 0.13H, one isomer), 3.13-3.01 (m, 0.13H, one isomer), 2.96-2.82 (m, 1H, two isomers), 2.78-2.68 (m, 0.87H, one isomer), 1.37 (d,  $J = 6.8$  Hz, 2.61H, one isomer), 1.26 (d,  $J = 6.8$  Hz, 0.39H, one isomer);  $^{13}\text{C}$  NMR (100 MHz,  $\text{CDCl}_3$ )  $\delta$  175.7 & 175.0 (two isomers), 170.8 & 169.4 (two isomers), 150.6 & 150.5 (two isomers), 137.1 & 137.1 (two isomers), 132.7 (q,  $J_{\text{C-F}} = 32.2$  Hz) (overlap, two isomers), 129.5 & 129.5 (two isomers), 128.4 & 128.3 (two isomers), 126.0 (overlap, two isomers), 125.5 (q,  $J_{\text{C-F}} = 3.6$  Hz) (overlap, two isomers), 123.9 (q,  $J_{\text{C-F}} = 270.8$  Hz) (overlap, two isomers), 121.5 & 121.5 (two isomers), 81.4 & 77.5 (two isomers), 43.8 & 43.3 (two isomers), 36.6 & 35.5 (two isomers), 20.0 & 16.0 (two isomers);  $^{19}\text{F}$  NMR (376 MHz,  $\text{CDCl}_3$ )  $\delta$  -62.9 (s) (overlap, two isomers). FT-IR:  $\nu$  ( $\text{cm}^{-1}$ ) 2965, 1760, 1695, 1618, 1593, 1575, 1493, 1458, 1432, 1411. HRMS [EI] calcd for  $\text{C}_{19}\text{H}_{16}\text{F}_3\text{NO}_2$  [ $\text{M}$ ] $^+$  347.1128, found 347.1134.

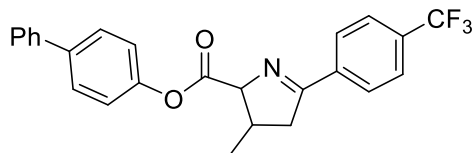

**3z:** *d.r.* = 1:3.2, 28.8 mg, 34% yield, yellow oil. Purification by flash column chromatography on silica gel (eluent: Acetone/Petroleum ether = 1/5).  $^1\text{H}$  NMR (400 MHz,  $\text{CDCl}_3$ )  $\delta$  8.05-8.00 (m, 2H, two isomers), 7.74-7.68 (m, 2H, two isomers), 7.63-7.54 (m, 4H, two isomers), 7.47-7.41 (m, 2H, two isomers), 7.39-7.32 (m, 1H, two isomers), 7.26-7.20 (m, 2H, two isomers), 5.20 (d,  $J = 8.0$  Hz, 0.24H, one isomer), 4.76 (d,  $J = 5.6$  Hz, 0.76H, one isomer), 3.48-3.38 (m, 0.76H, one isomer), 3.31-3.22 (m, 0.24H, one isomer), 3.14-3.05 (m, 0.24H, one isomer), 2.97-2.83 (m, 1H, two isomers), 2.79-2.70 (m, 0.76H, one isomer), 1.39 (d,  $J = 6.8$  Hz, 2.28H, one isomer), 1.29 (d,  $J = 6.8$  Hz, 0.72H, one isomer);  $^{13}\text{C}$  NMR (100 MHz,  $\text{CDCl}_3$ )  $\delta$  175.7 & 175.1 (two isomers), 170.9 & 169.5 (two isomers), 150.1 & 149.9 (two isomers), 140.3 (overlap, two isomers), 139.2 & 139.2 (two isomers), 137.1 & 137.0 (two isomers), 132.7 (q,  $J_{\text{C-F}}$

= 32.1 Hz) (overlap, two isomers), 128.8 (overlap, two isomers), 128.4 & 128.3 (two isomers), 128.2 & 128.2 (two isomers), 127.4 (overlap, two isomers), 127.1 (overlap, two isomers), 125.5 (q,  $J_{C-F} = 3.6$  Hz) (overlap, two isomers), 123.9 (q,  $J_{C-F} = 270.7$  Hz) (overlap, two isomers), 121.8 & 121.7 (two isomers), 81.4 & 77.5 (two isomers), 43.8 & 43.3 (two isomers), 36.7 & 35.5 (two isomers), 20.0 & 16.1 (two isomers);  $^{19}\text{F}$  NMR (376 MHz,  $\text{CDCl}_3$ )  $\delta$  -62.3 (s) & -62.9 (s) (two isomers). FT-IR:  $\nu$  ( $\text{cm}^{-1}$ ) 3263, 3077, 2972, 2893, 1982, 1733, 1676, 1646, 1597, 1450. HRMS [EI] calcd for  $\text{C}_{25}\text{H}_{20}\text{F}_3\text{NO}_2$  [M] $^+$  423.1441, found 423.1440.

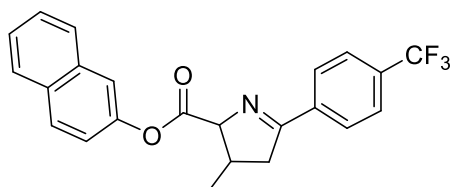

**3aa:** *d.r.* = 1:4, 31.8 mg, 40% yield, yellow oil. Purification by flash column chromatography on silica gel (eluent: Acetone/Petroleum ether = 1/5).  $^1\text{H}$  NMR (400 MHz,  $\text{CDCl}_3$ )  $\delta$  8.10-8.03 (m, 2H, two isomers), 7.99-7.94 (m, 1H, two isomers), 7.91-7.84 (m, 1H, two isomers),

7.78-7.68 (m, 3H, two isomers), 7.57-7.49 (m, 3H, two isomers), 7.36-7.31 (m, 1H, two isomers), 5.35 (d,  $J = 8.0$  Hz, 0.2H, one isomer), 4.93 (d,  $J = 5.6$  Hz, 0.8H, one isomer), 3.53-3.42 (m, 0.8H, one isomer), 3.35-3.25 (m, 0.2H, one isomer), 3.21-3.12 (m, 0.2H, one isomer), 3.11-3.01 (m, 0.8H, one isomer), 2.97-2.88 (m, 0.2H, one isomer), 2.84-2.74 (m, 0.8H, one isomer), 1.44 (d,  $J = 6.8$  Hz, 2.4H, one isomer), 1.36 (d,  $J = 7.6$  Hz, 0.6H, one isomer);  $^{13}\text{C}$  NMR (75 MHz,  $\text{CDCl}_3$ )  $\delta$  175.9 & 175.1 (two isomers), 170.8 & 169.4 (two isomers), 146.5 & 146.4 (two isomers), 137.2 & 137.1 (two isomers), 134.7 (overlap, two isomers), 132.7 (q,  $J_{C-F} = 32.5$  Hz) (overlap, two isomers), 128.4 & 128.4 (two isomers), 128.1 & 128.0 (two isomers), 126.7 & 126.7 (two isomers), 126.6 (overlap, two isomers), 126.5 (overlap, two isomers), 126.2 & 126.1 (two isomers), 125.5 (q,  $J_{C-F} = 3.7$  Hz) (overlap, two isomers), 125.4 & 125.3 (two isomers), 123.9 (q,  $J_{C-F} = 272.4$  Hz) (overlap, two isomers), 121.3 & 121.1 (two isomers), 118.0 & 117.9 (two isomers), 81.7 & 77.8 (two isomers), 43.9 & 43.4 (two isomers), 36.5 & 35.6 (two isomers), 20.1 & 16.1 (two isomers);  $^{19}\text{F}$  NMR (376 MHz,  $\text{CDCl}_3$ )  $\delta$  -62.9 (s) & -63.2 (s) (two isomers). FT-IR:  $\nu$  ( $\text{cm}^{-1}$ ) 3065, 2964, 2930, 1760, 1617, 1600, 1575, 1509, 1460, 1410. HRMS [EI] calcd for  $\text{C}_{23}\text{H}_{18}\text{F}_3\text{NO}_2$  [M] $^+$  397.1284, found 397.1296.

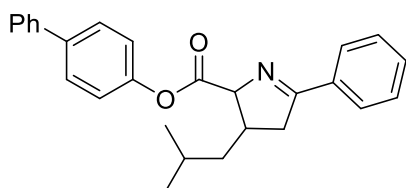

**3ab:** *d.r.* = 1:4, 41.3 mg, 52% yield, yellow oil. Purification by flash column chromatography on silica gel (eluent: EtOAc/Petroleum ether = 1/6).  $^1\text{H}$  NMR (400 MHz,  $\text{CDCl}_3$ )  $\delta$  7.93-7.88 (m, 2H, two isomers), 7.61-7.53 (m, 4H, two isomers), 7.46-7.39 (m, 5H, two isomers), 7.36-7.31 (m, 1H,

two isomers), 7.25-7.20 (m, 2H, two isomers), 5.21-5.17 (m, 0.2H, one isomer), 4.79-4.75 (m, 0.8H, one isomer), 3.39 (ddd,  $J = 16.8, 8.8, 1.6$  Hz, 0.8H, one isomer), 3.22-3.15 (m, 0.2H, one isomer), 2.94-2.84 (m, 1H, two isomers), 2.78-2.59 (m, 1H, two isomers), 1.82-1.73 (m, 1H, two isomers), 1.69-1.60 (m, 1H, two isomers), 1.54-1.45 (m, 1H, two isomers), 1.03-0.93 (m, 6H, two isomers);  $^{13}\text{C}$  NMR (100 MHz,  $\text{CDCl}_3$ )  $\delta$  177.8 & 176.2 (two isomers), 171.5 & 169.8 (two isomers), 150.2 & 150.0 (two isomers), 140.4 & 140.3 (two isomers), 139.1 & 139.1 (two isomers), 133.8 & 133.5 (two isomers), 131.2 & 131.1 (two isomers), 128.8 & 128.7 (two isomers), 128.5 & 128.4 (two isomers), 128.2 & 128.2 (two isomers), 128.1 & 128.0 (two isomers), 128.0 (overlap, two isomers), 127.4 & 127.1 (two isomers), 121.8 & 121.8 (two isomers), 80.1 & 77.0 (two isomers), 44.5 (overlap, two isomers), 42.2 & 40.7 (two isomers), 39.8

& 39.6 (two isomers), 27.1 & 26.7 (two isomers), 23.5 & 22.9 (two isomers), 22.4 & 21.9 (two isomers). FT-IR:  $\nu$  (cm<sup>-1</sup>) 3060, 2955, 2870, 1759, 1683, 1613, 1576, 1516, 1449, 1428. HRMS [ESI] calcd for C<sub>27</sub>H<sub>28</sub>NO<sub>2</sub> [M+H]<sup>+</sup> 398.2115, found 398.2115.

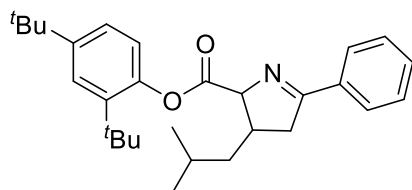

**3ac:** *d.r.* = 1:9, 80.6 mg, 93% yield, yellow oil. Purification by flash column chromatography on silica gel (eluent: EtOAc/Petroleum ether = 1/6). <sup>1</sup>H NMR (400 MHz, CDCl<sub>3</sub>)  $\delta$  7.95-7.89 (m, 2H, two isomers), 7.49-7.40 (m, 4H, two isomers), 7.26-7.22 (m, 1H, two isomers), 7.03-6.95 (m, 1H, two isomers), 5.19 (d, *J* = 8.0 Hz, 0.1H, one isomer), 4.80 (d, *J* = 5.6 Hz, 0.9H, one isomer), 3.42-3.32 (m, 0.9H, one isomer), 3.25 (dd, *J* = 15.2, 7.6 Hz, 0.1H, one isomer), 2.99-2.88 (m, 1H, two isomers), 2.87-2.83 (m, 0.1H, one isomer), 2.77 (dd, *J* = 16.8, 6.0 Hz, 0.9H, one isomer), 1.82-1.72 (m, 1H, two isomers), 1.69-1.60 (m, 1H, two isomers), 1.52-1.43 (m, 1H, two isomers), 1.39 (s, 8.1H, one isomer), 1.33 (s, 9H, two isomer), 1.32 (s, 0.9H, one isomer), 1.03-0.96 (m, 6H, two isomers); <sup>13</sup>C NMR (100 MHz, CDCl<sub>3</sub>)  $\delta$  177.5 & 175.8 (two isomers), 171.5 & 169.9 (two isomers), 148.1 (overlap, two isomers), 147.0 & 146.7 (two isomers), 140.4 & 140.1 (two isomers), 134.1 & 134.0 (two isomers), 131.0 (overlap, two isomers), 128.5 & 128.4 (two isomers), 128.0 & 128.0 (two isomers), 124.2 & 124.1 (two isomers), 123.8 & 123.6 (two isomers), 122.9 & 122.7 (two isomers), 80.9 & 77.8 (two isomers), 44.7 (overlap, two isomers), 42.1 & 40.8 (two isomers), 39.8 & 39.3 (two isomers), 34.8 (overlap, two isomers), 34.7 & 34.7 (two isomers), 31.5 (overlap, two isomers), 30.2 & 30.1 (two isomers), 27.3 & 26.7 (two isomers), 23.5 & 23.0 (two isomers), 22.3 & 21.9 (two isomers). FT-IR:  $\nu$  (cm<sup>-1</sup>) 2956, 2905, 2870, 1753, 1615, 1576, 1540, 1494, 1449, 1398. HRMS [ESI] calcd for C<sub>29</sub>H<sub>40</sub>NO<sub>2</sub> [M+H]<sup>+</sup> 434.3054, found 434.3051.

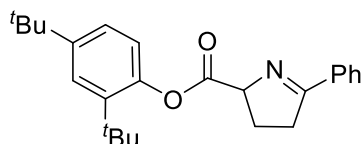

**3ad:** 64.1 mg, 85% yield, yellow solid, m.p. 88-89 °C. Purification by flash column chromatography on silica gel (eluent: EtOAc/Petroleum ether = 1/8). <sup>1</sup>H NMR (400 MHz, CDCl<sub>3</sub>)  $\delta$  7.96-7.91 (m, 2H), 7.48-7.41 (m, 3H), 7.40 (d, *J* = 2.4, 1H), 7.23 (dd, *J* = 8.4, 2.4 Hz, 1H), 6.98 (d, *J* = 8.4 Hz, 1H), 5.24-5.16 (m, 1H), 3.26-3.05 (m, 2H), 2.57-2.39 (m, 2H), 1.36 (s, 9H), 1.32 (s, 9H); <sup>13</sup>C NMR (100 MHz, CDCl<sub>3</sub>)  $\delta$  176.4, 171.5, 148.2, 146.9, 140.1, 133.8, 131.1, 128.5, 128.1, 124.1, 123.8, 122.9, 75.1, 35.5, 34.7, 34.7, 31.5, 30.2, 26.5. FT-IR:  $\nu$  (cm<sup>-1</sup>) 2997, 2964, 2870, 2159, 1976, 1718, 1653, 1636, 1609, 1507, 1445. HRMS [ESI] calcd for C<sub>25</sub>H<sub>32</sub>NO<sub>2</sub> [M+H]<sup>+</sup> 378.2428, found 378.2419.

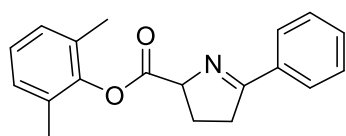

**3ae:** 51.0 mg, 87% yield, yellow solid, m.p. 64-65 °C. Purification by flash column chromatography on silica gel (eluent: EtOAc/Petroleum ether = 1/8). <sup>1</sup>H NMR (400 MHz, CDCl<sub>3</sub>)  $\delta$  7.96-7.91 (m, 2H), 7.51-7.41 (m, 3H), 7.09-7.01 (m, 3H), 5.27-5.20 (m, 1H), 3.29-3.06 (m, 2H), 2.57-2.42 (m, 2H), 2.19 (s, 6H); <sup>13</sup>C NMR (100 MHz, CDCl<sub>3</sub>)  $\delta$  176.4, 170.5, 148.1, 133.8, 131.1, 130.2, 128.6, 128.5, 128.1, 125.9, 74.7, 35.6, 26.5, 16.4. FT-IR:  $\nu$  (cm<sup>-1</sup>) 3026, 2921, 2852, 1981, 1747, 1618, 1574, 1494, 1471, 1450. HRMS [ESI] calcd for C<sub>19</sub>H<sub>19</sub>NO<sub>2</sub>Na [M+Na]<sup>+</sup> 316.1308, found 316.1294.

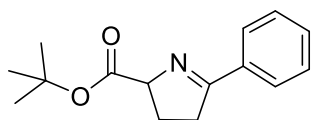

**3af:** 46.6 mg, 95% yield, yellow solid, m.p. 42-43 °C. Purification by flash column chromatography on silica gel (eluent: EtOAc/Petroleum ether = 1/8). <sup>1</sup>H NMR (400 MHz, CDCl<sub>3</sub>) δ 7.90-7.85 (m, 2H), 7.44-7.37 (m, 3H), 4.84-4.78 (m, 1H), 3.17-3.06 (m, 1H), 3.02-2.91 (m, 1H), 2.37-2.26 (m, 1H), 2.21-2.10 (m, 1H), 1.49 (s, 9H); <sup>13</sup>C NMR (100 MHz, CDCl<sub>3</sub>) δ 175.9, 172.3, 134.0, 130.8, 128.4, 128.0, 81.2, 75.3, 35.4, 28.1, 26.7. FT-IR: ν (cm<sup>-1</sup>) 2980, 2928, 2159, 2031, 1727, 1653, 1636, 1604, 1507, 1447. HRMS [ESI] calcd for C<sub>15</sub>H<sub>19</sub>NO<sub>2</sub>Na [M+Na]<sup>+</sup> 268.1308, found 268.1300.

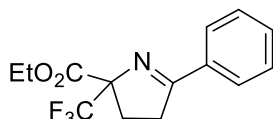

**3ag:** 52.5 mg, 92% yield, yellow oil. Purification by flash column chromatography on silica gel (eluent: EtOAc/Petroleum ether = 1/8). <sup>1</sup>H NMR (400 MHz, CDCl<sub>3</sub>) δ 7.95-7.91 (m, 2H), 7.54-7.48 (m, 1H), 7.47-7.41 (m, 2H), 4.29 (q, *J* = 7.2 Hz, 2H), 3.21 (t, *J* = 8.0 Hz, 2H), 2.64-2.54 (m, 1H), 2.51-2.41 (m, 1H), 1.31 (t, *J* = 7.2 Hz, 3H); <sup>13</sup>C NMR (100 MHz, CDCl<sub>3</sub>) δ 179.9, 167.9, 132.9, 131.8, 128.6, 128.5, 124.6 (q, *J*<sub>C-F</sub> = 280.8 Hz), 85.3 (q, *J*<sub>C-F</sub> = 26.9 Hz), 62.4, 36.0, 28.0 (q, *J*<sub>C-F</sub> = 1.1 Hz), 14.0; <sup>19</sup>F NMR (376 MHz, CDCl<sub>3</sub>) δ -74.7 (s). FT-IR: ν (cm<sup>-1</sup>) 3006, 2921, 2849, 2158, 1965, 1714, 1658, 1613, 1604, 1502, 1424. HRMS [EI] calcd for C<sub>14</sub>H<sub>14</sub>F<sub>3</sub>NO<sub>2</sub> [M]<sup>+</sup> 285.0971, found 285.0976.

## 5. Gram-scale reaction

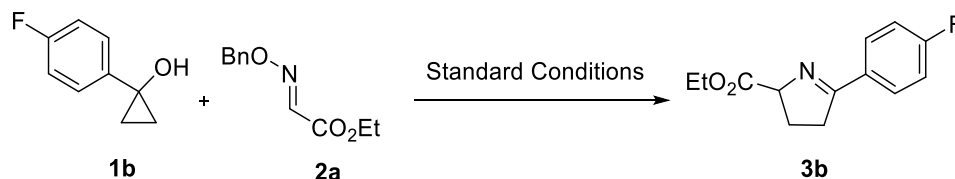

Cyclopropanol **1b** (3.0 mmol, 1.5 equiv.), oxime ether **2a** (2.0 mmol, 1.0 equiv.), and MnCl<sub>2</sub> (0.4 mmol, 20 mol %) were loaded in a flame-dried reaction vial, which was subjected to evacuation/ flushing with nitrogen three times. HFIP (40 mL) was added to the mixture via syringe. Then acetylacetone (acac, 2.0 mmol, 1.0 equiv.) and AcOH (2.0 mmol, 1.0 equiv.) were added to the mixture, which was stirred at room temperature for 14 h. The mixture was quenched with H<sub>2</sub>O. The aqueous layer was extracted with DCM. The organic layer was washed with brine, dried over Na<sub>2</sub>SO<sub>4</sub>, concentrated in vacuum, and purified by flash column chromatography on silica gel (eluent: EtOAc/Petroleum ether) to give the corresponding product **3b** (0.376 g, 78% yield).

## 6. Transformation of compound 3a

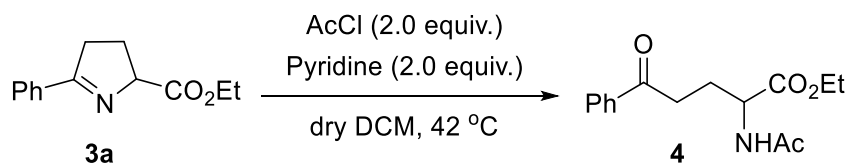

Under argon atmosphere, to a stirred solution of **3a** (33.0 mg, 0.15 mmol, 1.0 equiv.) in dry DCM (1.5 ml) was added fresh acetyl chloride (0.45 mmol, 35.3 mg, 32.0 μl, 3.0 equiv.) and pyridine (0.3 mmol, 23.7 mg, 24.2 μl, 2.0 equiv.) dropwise, The reaction mixture was stirred at 42

°C. Upon reaction completion, the mixture was concentrated in vacuo and purified by flash column chromatography on silica gel to afford the compound **4**.

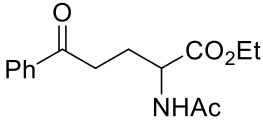**4**: 26.2 mg, 63% yield, yellow solid, m.p. 100-101 °C. Purification by flash column chromatography on silica gel (eluent: EtOAc/Petroleum ether = 1/5). <sup>1</sup>H NMR (400 MHz, CDCl<sub>3</sub>) δ 7.96-7.90 (m, 2H), 7.60-7.53 (m, 1H), 7.49-7.42 (m, 2H), 6.31 (d, *J* = 7.6 Hz, 1H), 4.68-4.60 (m, 1H), 4.25-4.14 (m, 2H), 3.19-2.99 (m, 2H), 2.37-2.26 (m, 1H), 2.20-2.08 (m, 1H), 1.99 (s, 3H), 1.26 (t, *J* = 7.2 Hz, 3H); <sup>13</sup>C NMR (100 MHz, CDCl<sub>3</sub>) δ 199.2, 172.2, 170.1, 136.6, 133.3, 128.7, 128.0, 61.7, 52.0, 34.7, 26.7, 23.2, 14.1. FT-IR: ν (cm<sup>-1</sup>) 3265, 3078, 2972, 2941, 2893, 1732, 1677, 1646, 1597, 1450. HRMS [ESI] calcd for C<sub>15</sub>H<sub>19</sub>NO<sub>4</sub>Na [M+Na]<sup>+</sup> 300.1206, found 300.1213.

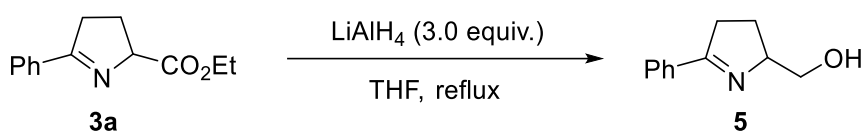

A screw-cap vial under N<sub>2</sub> was charged with **3a** (0.15 mmol, 1.0 equiv.) and dry THF (2.0 mL). At 0 °C, the solution of LiAlH<sub>4</sub> (0.45 mmol, 3.0 equiv.) in dry THF (2.0 mL) was added to the vial in small portions and the mixture was allowed to react at refluxing temperature. After stirring for 4 h, the reaction mixture was cooled to r.t. and quenched by saturated aq. NH<sub>4</sub>Cl, the mixture was extracted with EtOAc for three times. Then the organic phase was combined and dried over anhydrous MgSO<sub>4</sub>. The solvent was removed under vacuum and the residue was purified by flash column chromatography on silica gel to provide the product **5**.

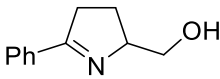**5**: 23.6 mg, 90% yield, brown oil. Purification by flash column chromatography on silica gel (eluent: EtOAc/Petroleum ether = 1/1). <sup>1</sup>H NMR (400 MHz, CDCl<sub>3</sub>) δ 7.81-7.75 (m, 2H), 7.47-7.35 (m, 3H), 4.40-4.31 (m, 1H), 4.02 (dd, *J* = 11.2, 3.6 Hz, 1H), 3.68-3.60 (m, 1H), 3.09-2.98 (m, 1H), 2.95-2.83 (m, 1H), 2.83 (br, 1H), 2.19-2.07 (m, 1H), 1.90-1.75 (m, 1H); <sup>13</sup>C NMR (100 MHz, CDCl<sub>3</sub>) δ 174.8, 133.9, 130.8, 128.5, 127.9, 74.6, 66.0, 35.7, 24.5. FT-IR: ν (cm<sup>-1</sup>) 3394, 3132, 3055, 2960, 2920, 2849, 1683, 1646, 1615, 1452, 1088. HRMS [ESI] calcd for C<sub>11</sub>H<sub>13</sub>NONa [M+Na]<sup>+</sup> 198.0889, found 198.0879.

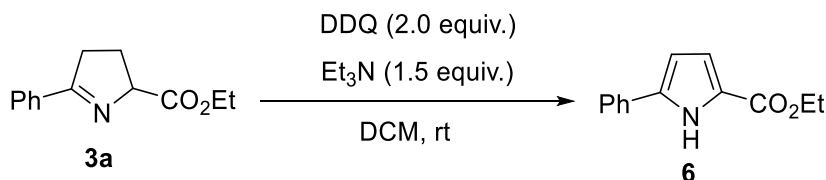

Triethylamine (0.18 mmol, 18.2 mg, 25.0 μl, 1.5 equiv.) was added to the solution of **3a** (29.3 mg, 0.12 mmol) and 2,3-dichloro-5,6-dicyano-1,4-benzoquinone (DDQ, 54.9 mg, 0.24 mmol, 2.0 equiv.) in CH<sub>2</sub>Cl<sub>2</sub> (2 mL) under N<sub>2</sub>, the reaction mixture was stirred at r.t. After stirring for 3 h, the solvent was removed under vacuum and the residue was purified by flash column chromatography on silica gel to provide the product **6**.



**6:** 20.5 mg, 53% yield, white solid, m.p. 120-121 °C. Purification by flash column chromatography on silica gel (eluent: EtOAc/Petroleum ether = 1/6). <sup>1</sup>H NMR (400 MHz, CDCl<sub>3</sub>) δ 9.54 (s, 1H), 7.64-7.55 (m, 2H), 7.45-7.37 (m, 2H), 7.34-7.27 (m, 1H), 6.97 (s, 1H), 6.54 (s, 1H), 4.35 (q, *J* = 7.2 Hz, 2H), 1.38 (t, *J* = 7.2 Hz, 3H); <sup>13</sup>C NMR (100 MHz, CDCl<sub>3</sub>) δ 161.4, 136.8, 131.4, 129.0, 127.7, 124.8, 123.4, 116.7, 107.9, 60.5, 14.5. FT-IR: ν (cm<sup>-1</sup>) 3316, 3278, 2993, 2921, 2850, 1682, 1603, 1583, 1510, 1461. HRMS [ESI] calcd for C<sub>13</sub>H<sub>13</sub>NO<sub>2</sub>Na [M+Na]<sup>+</sup> 238.0838, found 238.0830.

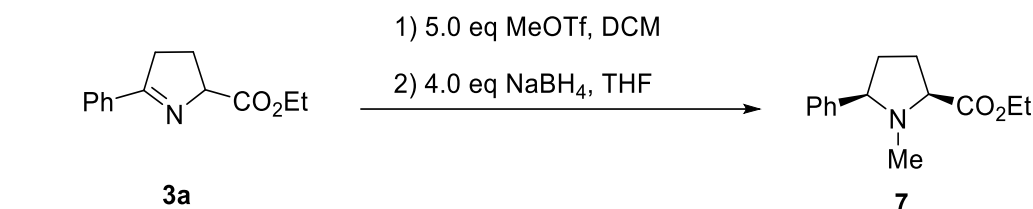

**3a** (0.2 mmol, 1.0 equiv.), activated 4 Å powdered molecular sieves (300 mg), and anhydrous CH<sub>2</sub>Cl<sub>2</sub> (3 mL) was stirred at r.t. for 15 min, and then MeOTf (1.0 mmol, 5.0 equiv.) was added in twice. The suspension was stirred at r.t. for 4 h and then concentrated to dryness without filtering off the molecular sieves. To a cooled (0 °C), stirred suspension of the crude salt in anhydrous THF (3 mL) was added NaBH<sub>4</sub> (0.8 mmol, 4.0 equiv.). The mixture was stirred at rt. until the starting material had been consumed as determined by TLC. The crude mixture was quenched by NH<sub>4</sub>Cl. The resulting aqueous phase was extracted with Et<sub>2</sub>O. The combined organic extracts were washed with brine, dried over MgSO<sub>4</sub>, filtered and concentrated in vacuo. The residue was eluted from a short column of silica gel (EtOAc/petroleum ether = 1:3) to afford **7**.

**7-cis:** 18.6 mg, 40% yield, yellow oil. Purification by flash column chromatography on silica gel (eluent: EtOAc/Petroleum ether = 1/3). <sup>1</sup>H NMR (400 MHz, CDCl<sub>3</sub>) δ 7.45-7.39 (m, 2H), 7.35-7.29 (m, 2H), 7.26-7.21 (m, 1H), 4.23 (q, *J* = 7.2 Hz, 2H), 3.40-3.33 (m, 1H), 3.21-3.14 (m, 1H), 2.24 (s, 3H), 2.18-2.02 (m, 3H), 1.90-1.78 (m, 1H), 1.31 (t, *J* = 7.2 Hz, 3H); <sup>13</sup>C NMR (100 MHz, CDCl<sub>3</sub>) δ 174.0, 142.8, 128.4, 127.5, 127.2, 71.9, 68.1, 60.6, 39.8, 34.5, 27.8, 14.3. FT-IR: ν (cm<sup>-1</sup>) 2973, 2882, 1734, 1653, 1455, 1380, 1322, 1274. HRMS [ESI] calcd for C<sub>14</sub>H<sub>19</sub>NO<sub>2</sub>Na [M+Na]<sup>+</sup> 256.1308, found 256.1300.

**7-trans:** 2.8 mg, 6% yield, yellow oil. <sup>1</sup>H NMR (400 MHz, CDCl<sub>3</sub>) δ 7.59-7.54 (m, 2H), 7.42-7.36 (m, 3H), 4.49 (dd, *J* = 12.0, 7.6 Hz, 1H), 4.32-4.19 (m, 2H), 4.14 (t, *J* = 8.4 Hz, 1H), 2.65-2.52 (m, 1H), 2.45-2.35 (m, 1H), 2.32 (s, 3H), 2.31-2.19 (m, 2H), 1.33 (t, *J* = 7.2 Hz, 3H); <sup>13</sup>C NMR (100 MHz, CDCl<sub>3</sub>) δ 169.3, 132.4, 131.2, 129.5, 128.1, 76.1, 72.4, 61.6, 39.6, 27.3, 25.6, 14.1. FT-IR: ν (cm<sup>-1</sup>) 2973, 2882, 1734, 1653, 1455, 1380, 1322, 1274. HRMS [ESI] calcd for C<sub>14</sub>H<sub>19</sub>NO<sub>2</sub>Na [M+Na]<sup>+</sup> 256.1308, found 256.1300.

## 7. Mechanistic studies

### 7.1 Verification of Radical mechanism

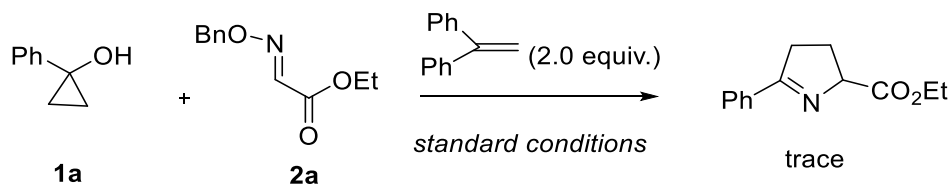

When ethene-1,1-diyldibenzene (2.0 equiv.) was introduced into the model reaction, only trace products were detected according to TLC analysis.

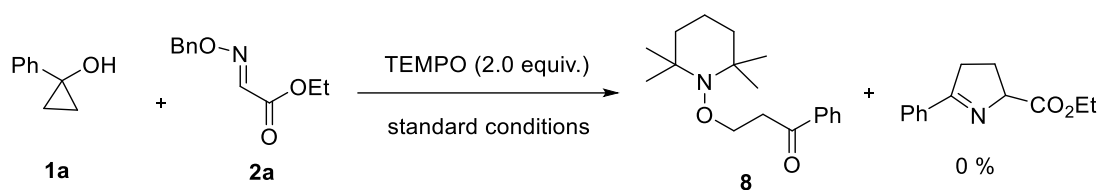

Following the standard procedures, additional 2.0 equiv. TEMPO was added. **8** was detected by HRMS. HRMS [ESI] calcd for  $\text{C}_{18}\text{H}_{27}\text{NO}_2$   $[\text{M}]^+$  289.2036, found 289.2038.

### 7.2 Reaction ratio plot of 20 mol% $\text{Mn}(\text{acac})_3$ and $\text{Mn}(\text{acac})_2$

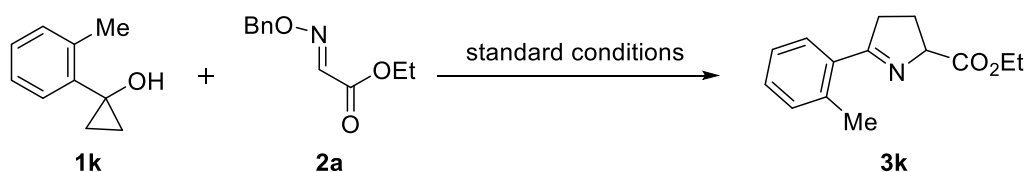

**Table 1.** The yields of reaction with **1k** and 20 mol%  $\text{Mn}(\text{acac})_3$  at different time interval

| Time (min) | 5 | 10 | 15 | 20 |
|------------|---|----|----|----|
| Yield/%    | 7 | 7  | 7  | 19 |

**Table 2.** The yields of reaction with **1k** and 20 mol%  $\text{Mn}(\text{acac})_2$  at different time interval

| Time (min) | 5  | 10 | 15 | 20 |
|------------|----|----|----|----|
| Yield/%    | 37 | 41 | 42 | 45 |

**Figure 1.** Plot of the reaction yields of  $\text{Mn}(\text{acac})_2$  and  $\text{Mn}(\text{acac})_3$  in different time

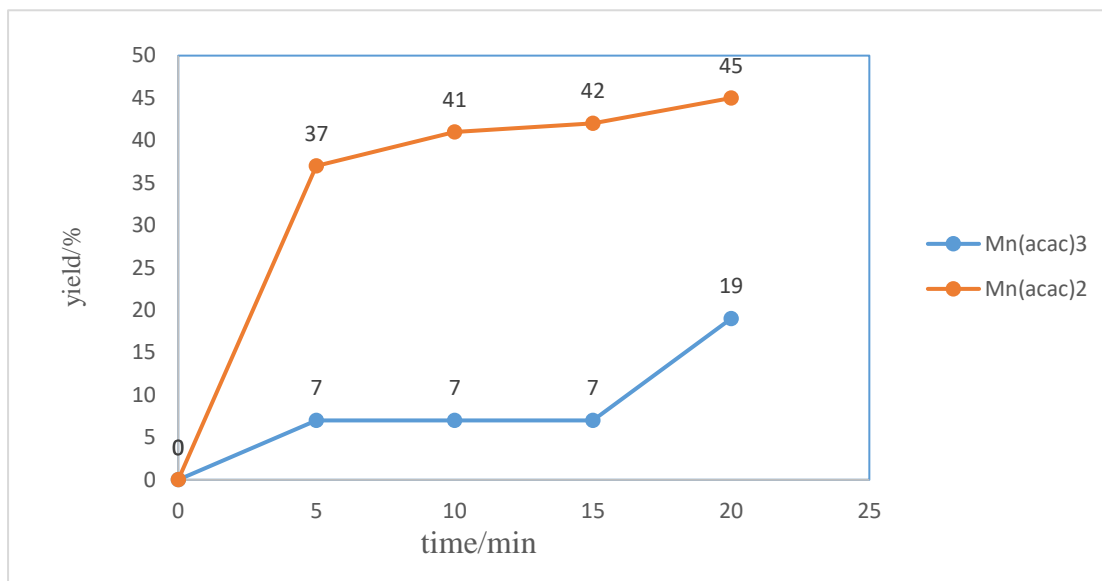

### 7.3 $^1\text{H}$ NMR experiments to verify the formation of Mn-O species from $\text{Mn}(\text{acac})_2$

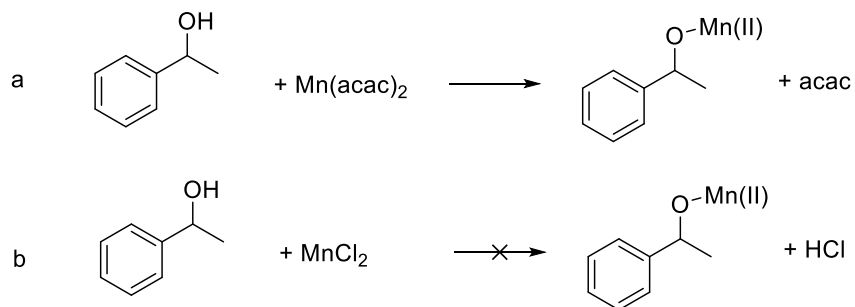

### $^1\text{H}$ NMR of 1-phenylethanol

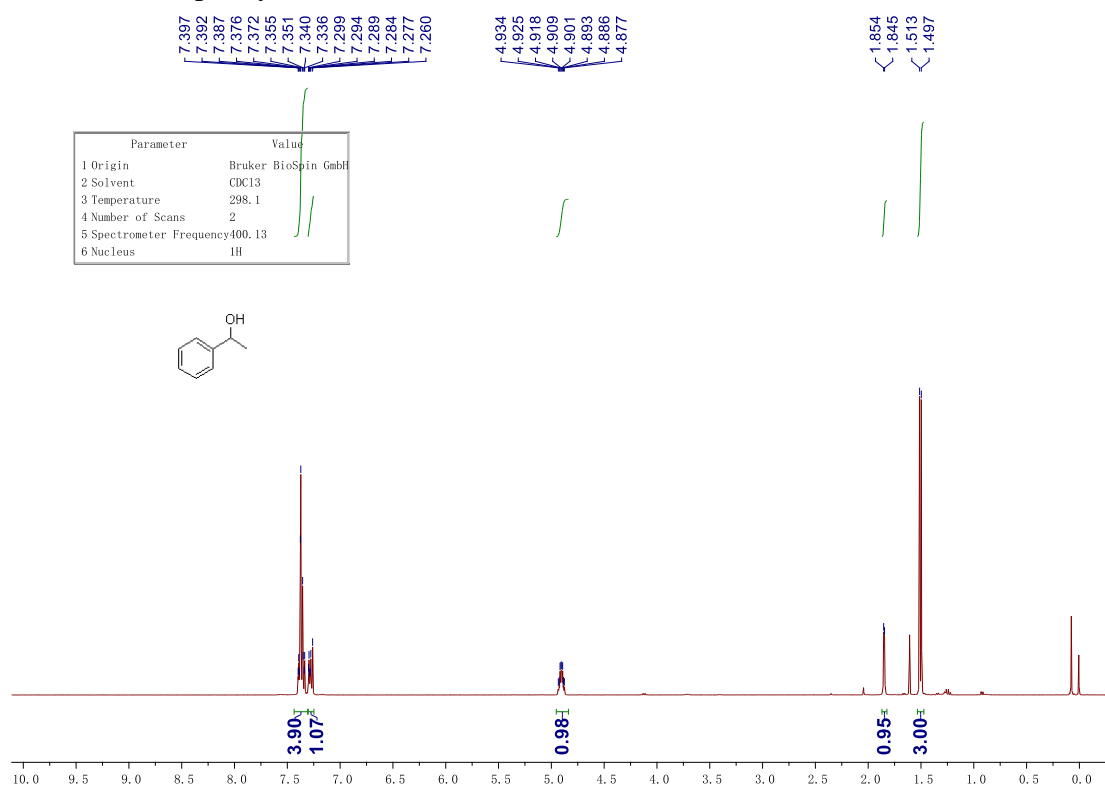

<sup>1</sup>H NMR of 1-phenylethan-1-ol and MnCl<sub>2</sub> (nothing changes in the spectrum)

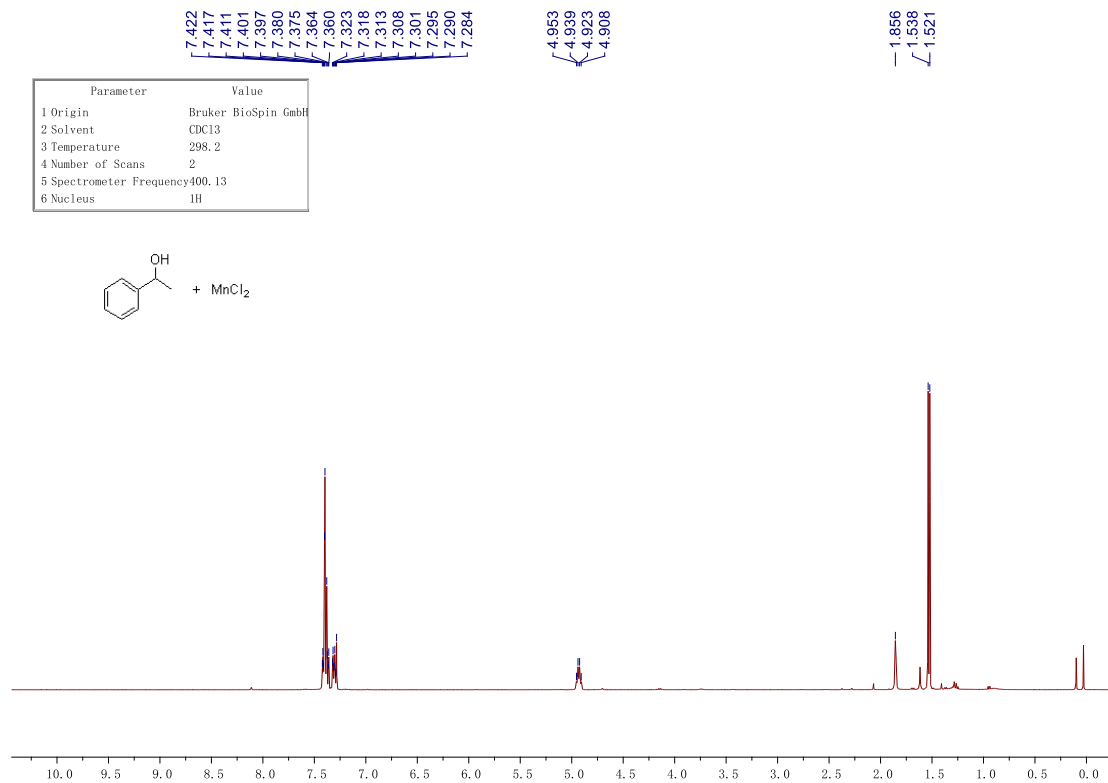

<sup>1</sup>H NMR of 1-phenylethan-1-ol and Mn(acac)<sub>2</sub>

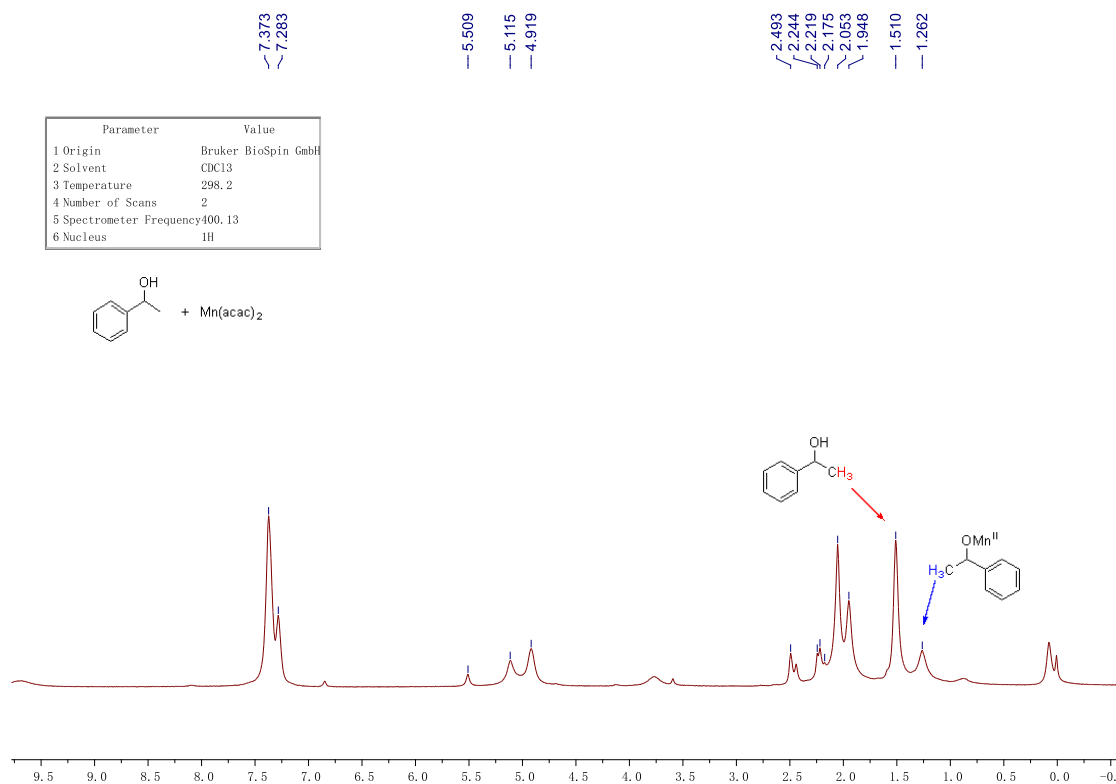

## <sup>1</sup>H NMR of acac

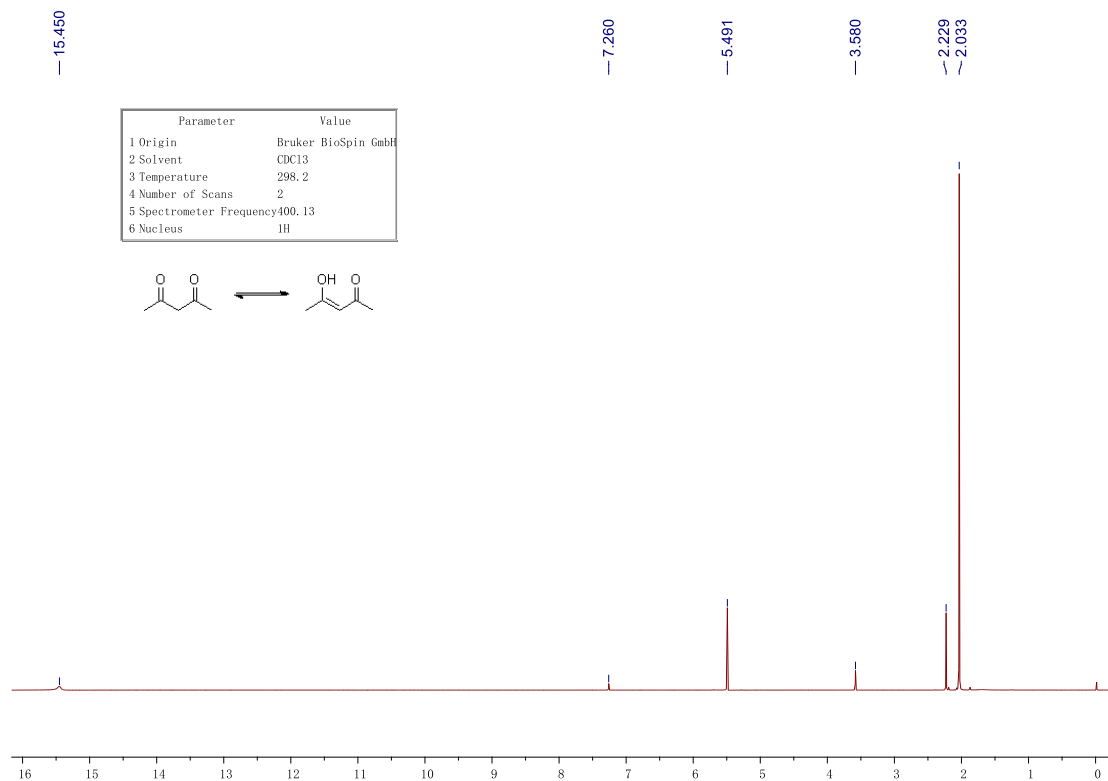

## 8. References

- (a) M. Ji, Z. Wu, C. Zhu, *Chem. Commun.*, **2019**, 55, 2368-2371. (b) W. He, Y. Shu, J. Dai, W. Zhang, Y.-S. Feng, H. Xu, *Org. Biomol. Chem.*, **2015**, 13, 7159-7163. (c) D. Chen, Y. Fu, X. Cao, J. Luo, F. Wang, S. Huang, *Org. Lett.* **2019**, 21, 5600-5605. (d) R. Rivera, Y. Jang, C. Poteat, V. N. G. Lindsay, *Org. Lett.* **2020**, 22, 6510-6515. (e) M. Rubina, M. Rubin, *Chem. Heterocycl. Comp.* **2012**, 48, 807-821. (f) G. Z. Elek, V. Borovkov, M. Lopp, D. G. Kananovich, *Org. Lett.* **2017**, 19, 3544-3547.
- G. Wu, J. Wang, C. Liu, M. Sun, L. Zhang, Y. Ma, R. Cheng, J. Ye, *Org. Chem. Front.* **2019**, 6, 2245.

## 9. $^1\text{H}$ , $^{13}\text{C}$ , and $^{19}\text{F}$ NMR spectra

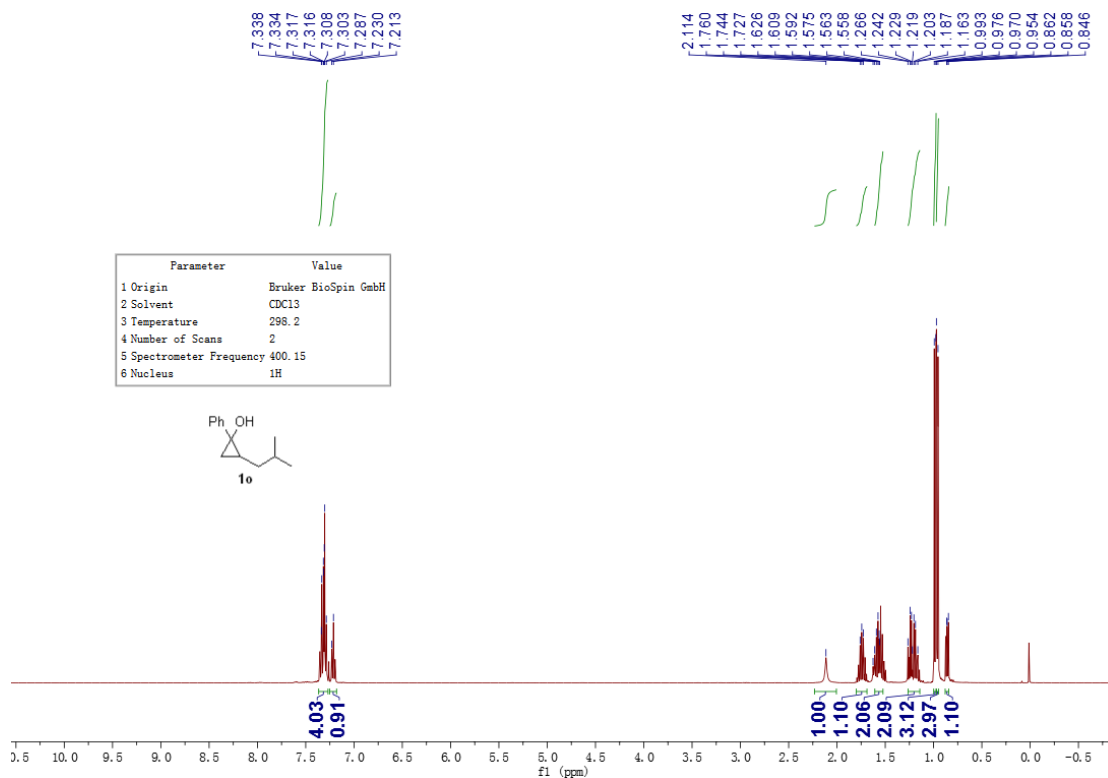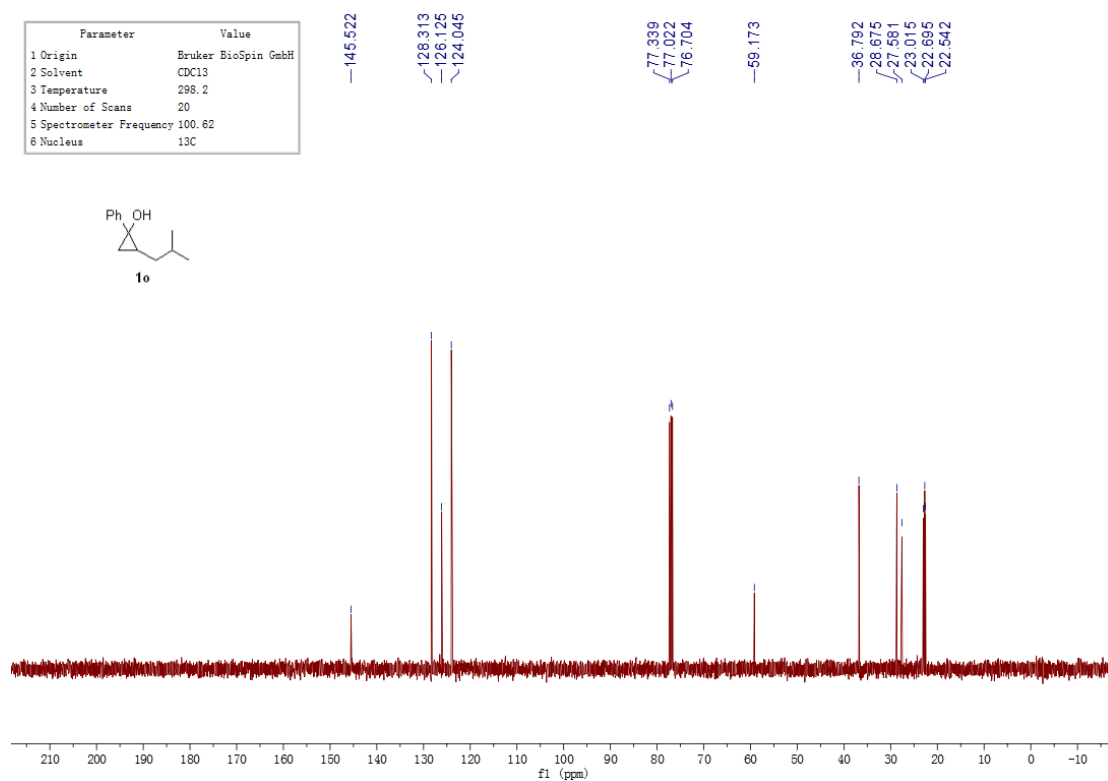

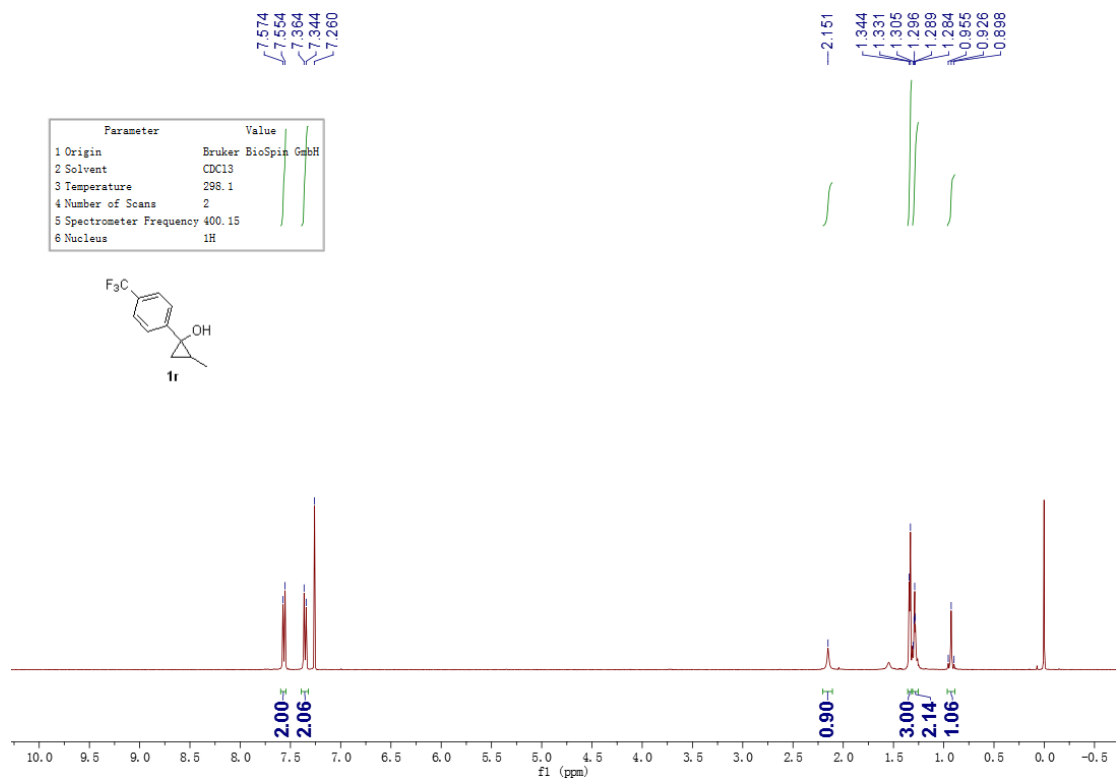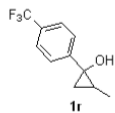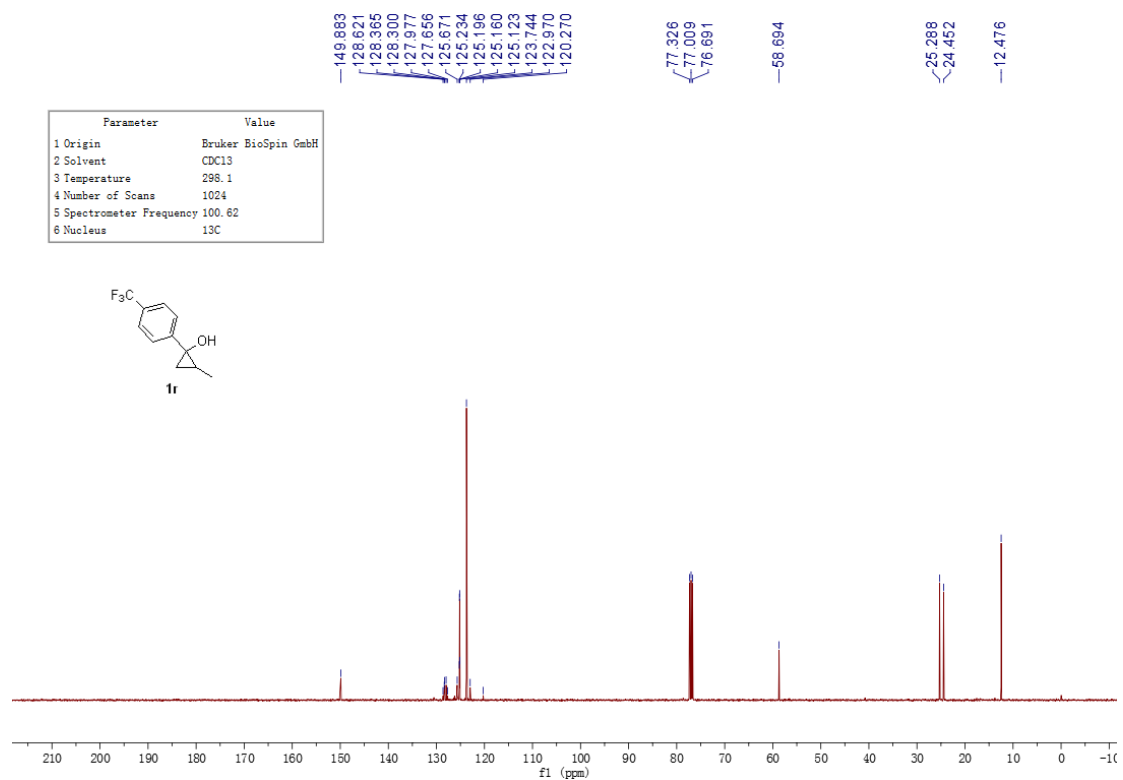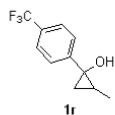

---62.315

| Parameter                | Value               |
|--------------------------|---------------------|
| 1 Origin                 | Bruker BioSpin GmbH |
| 2 Solvent                | CDCl3               |
| 3 Temperature            | 298.2               |
| 4 Number of Scans        | 2                   |
| 5 Spectrometer Frequency | 376.52              |
| 6 Nucleus                | 19F                 |

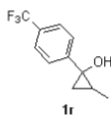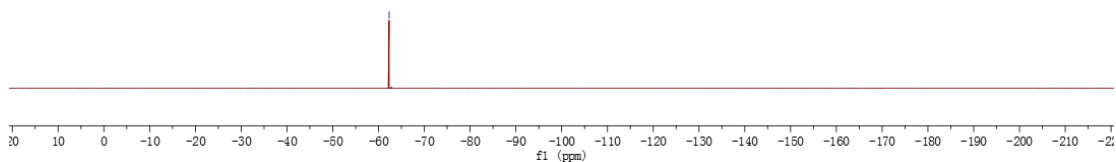

7.418  
7.414  
7.409  
7.397  
7.394  
7.389  
7.384  
7.352  
7.334  
7.330  
7.318  
7.315  
7.280  
7.277  
7.273  
7.260

2.263  
1.806  
1.784  
1.708  
1.686  
1.647  
1.611  
1.447  
1.436  
1.306  
1.301  
1.290  
1.281  
1.073  
1.059  
1.054  
1.044

| Parameter                | Value               |
|--------------------------|---------------------|
| 1 Origin                 | Bruker BioSpin GmbH |
| 2 Solvent                | CDCl3               |
| 3 Temperature            | 296.1               |
| 4 Number of Scans        | 2                   |
| 5 Spectrometer Frequency | 400.13              |
| 6 Nucleus                | 1H                  |

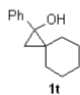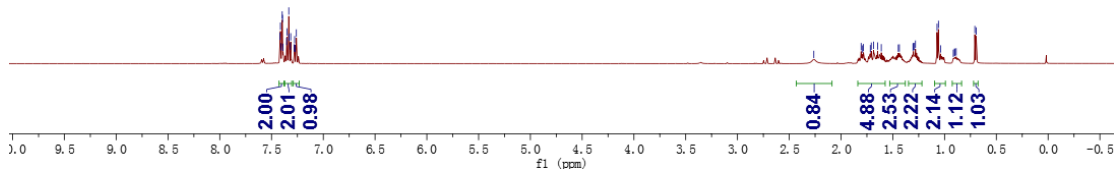



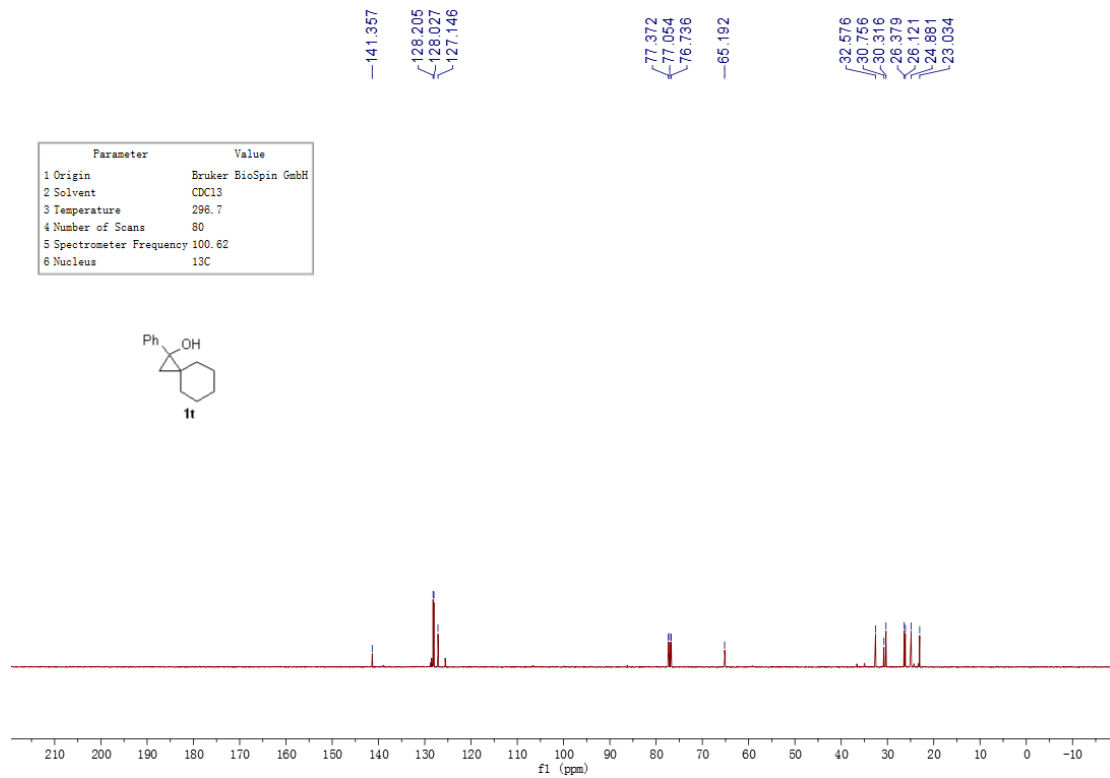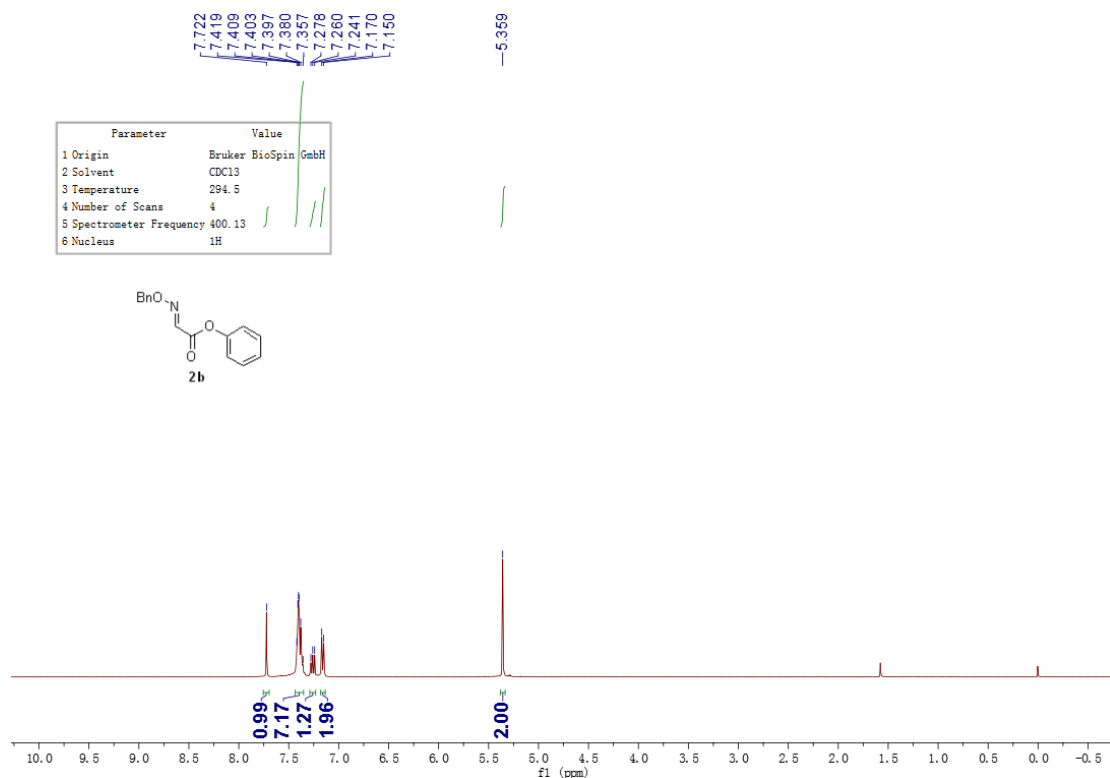

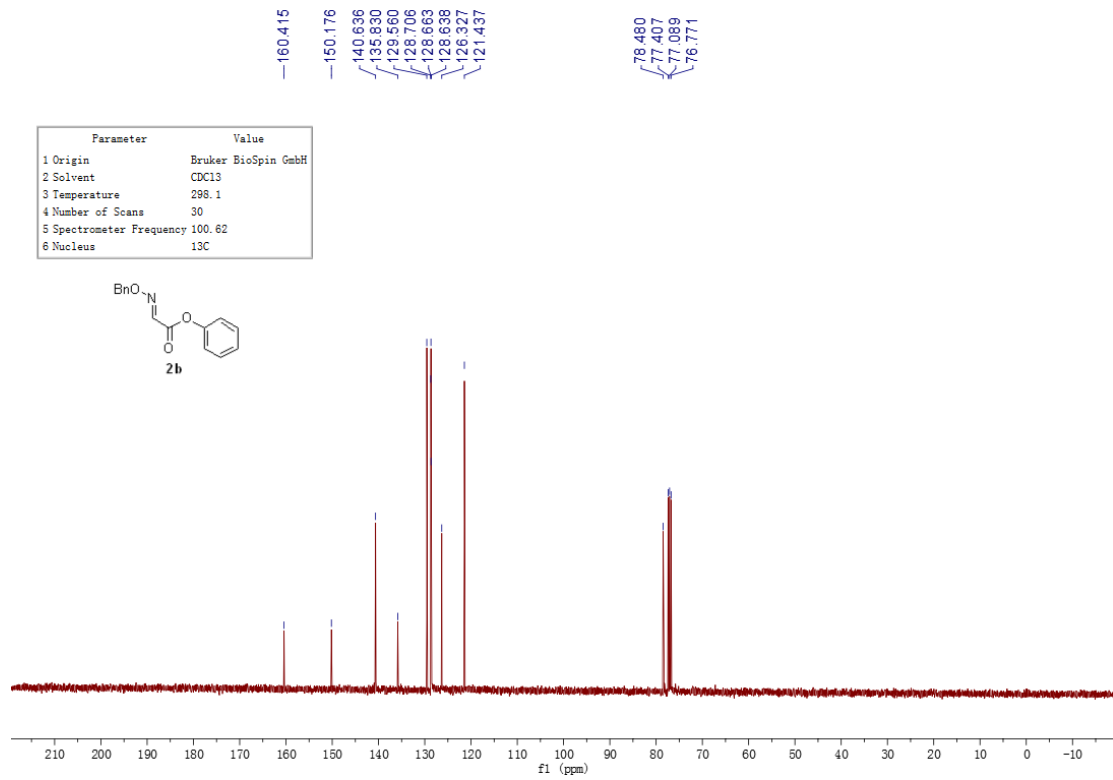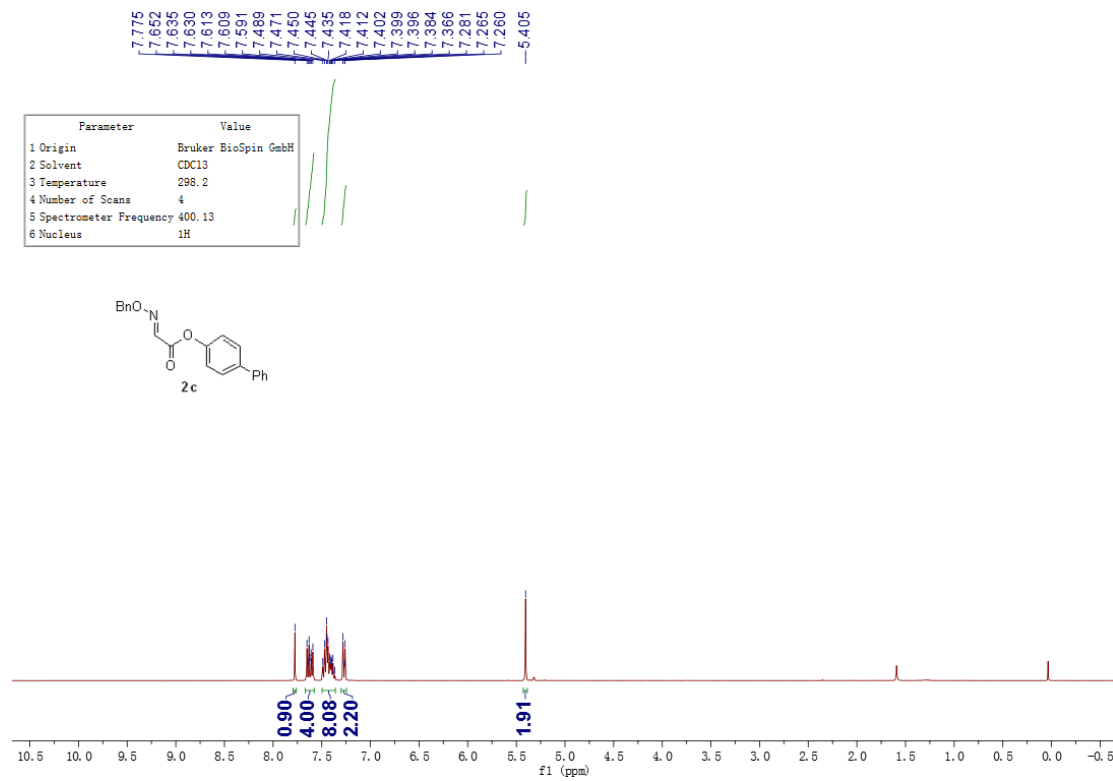

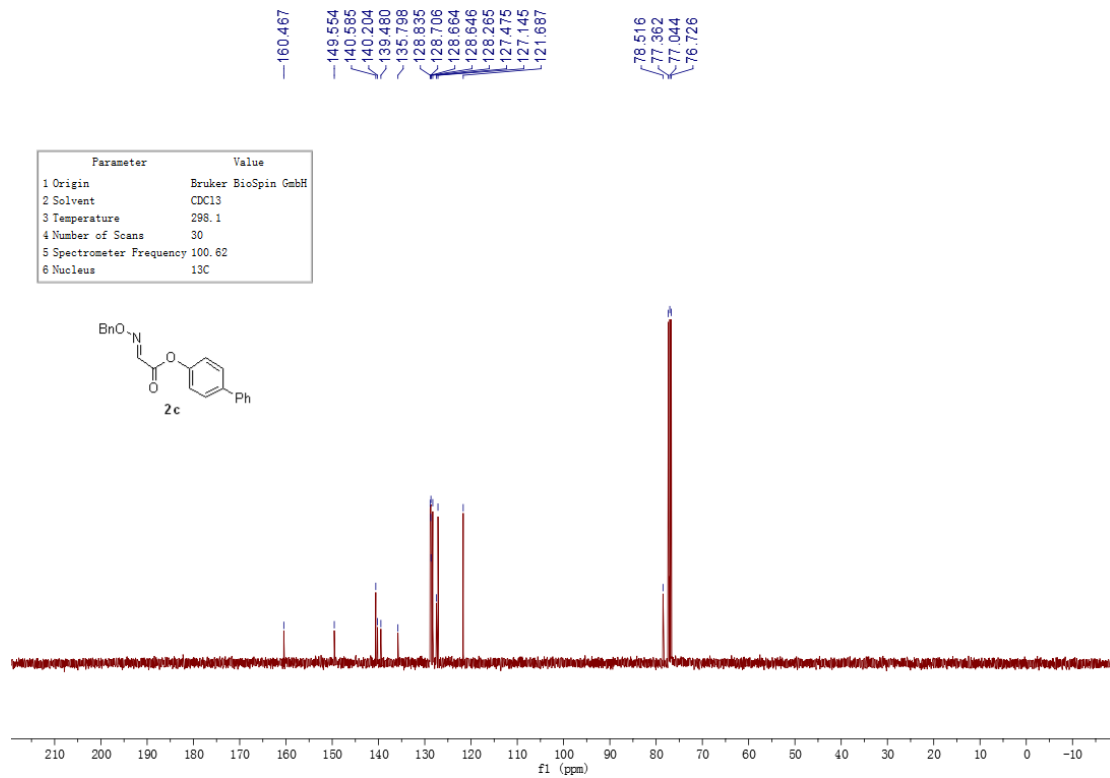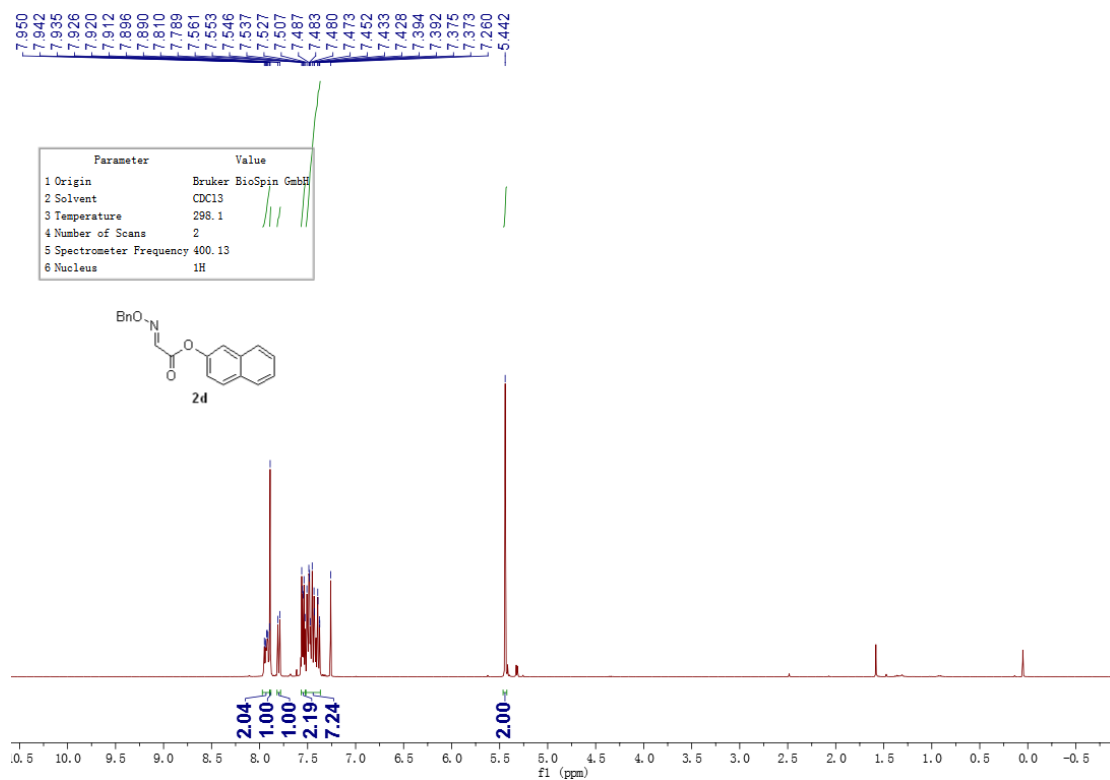

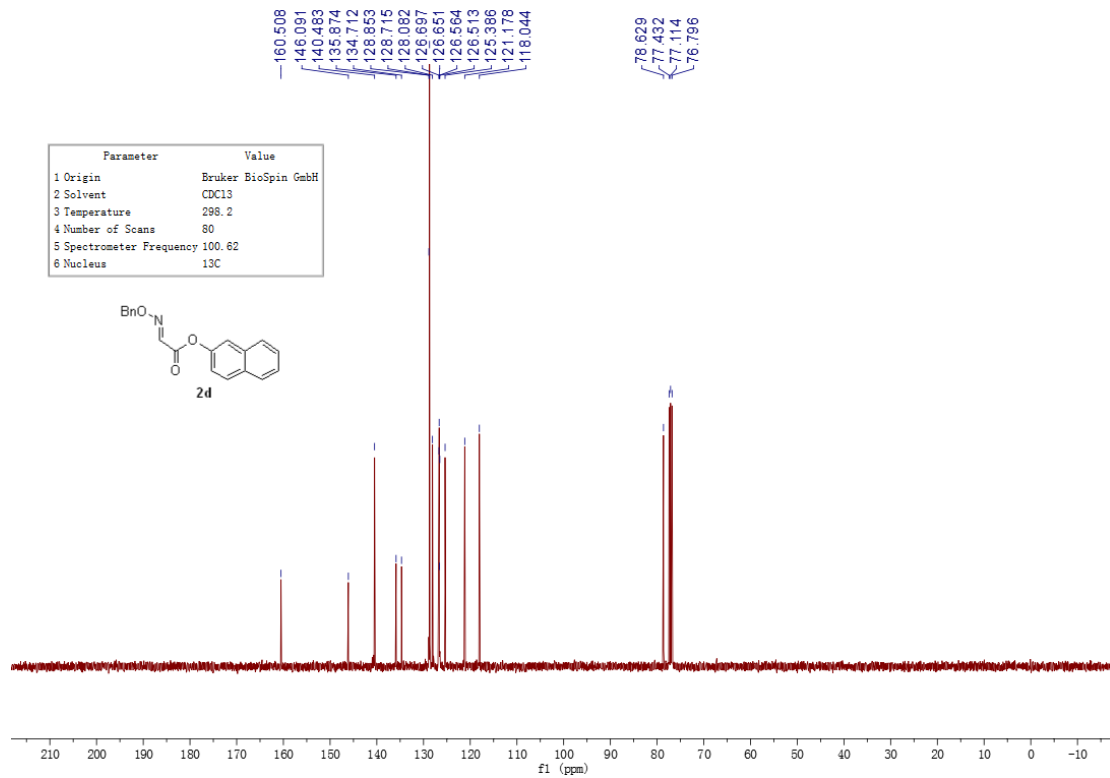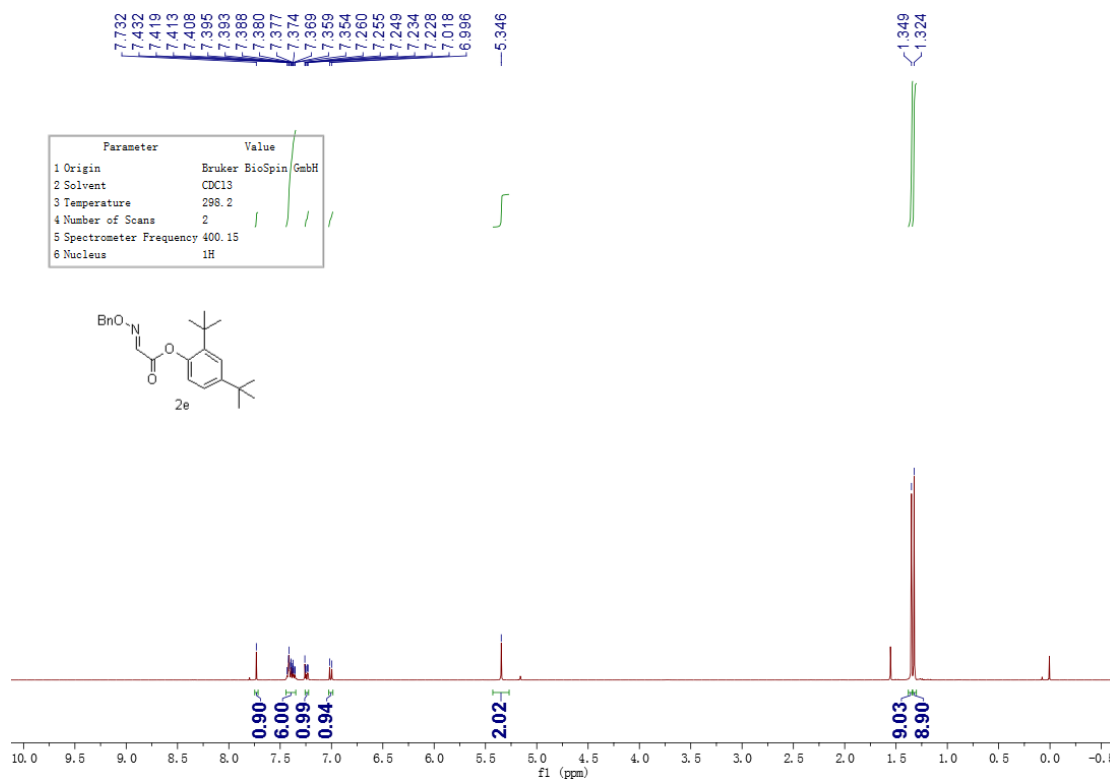

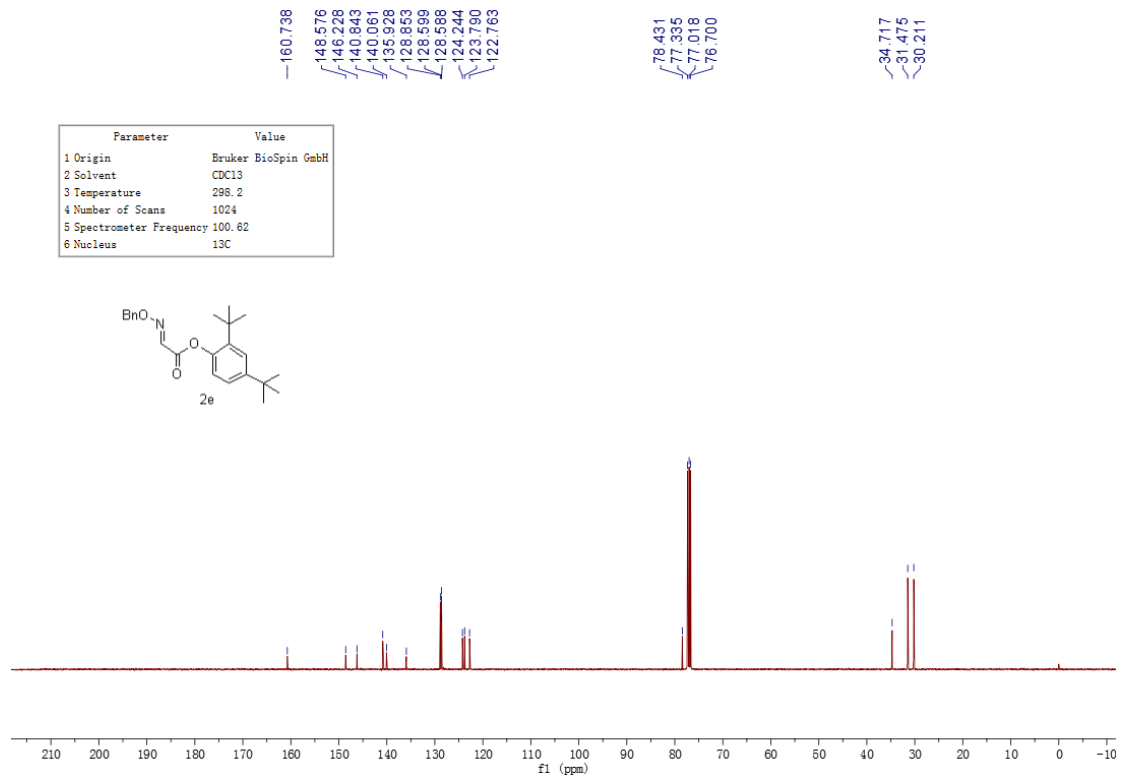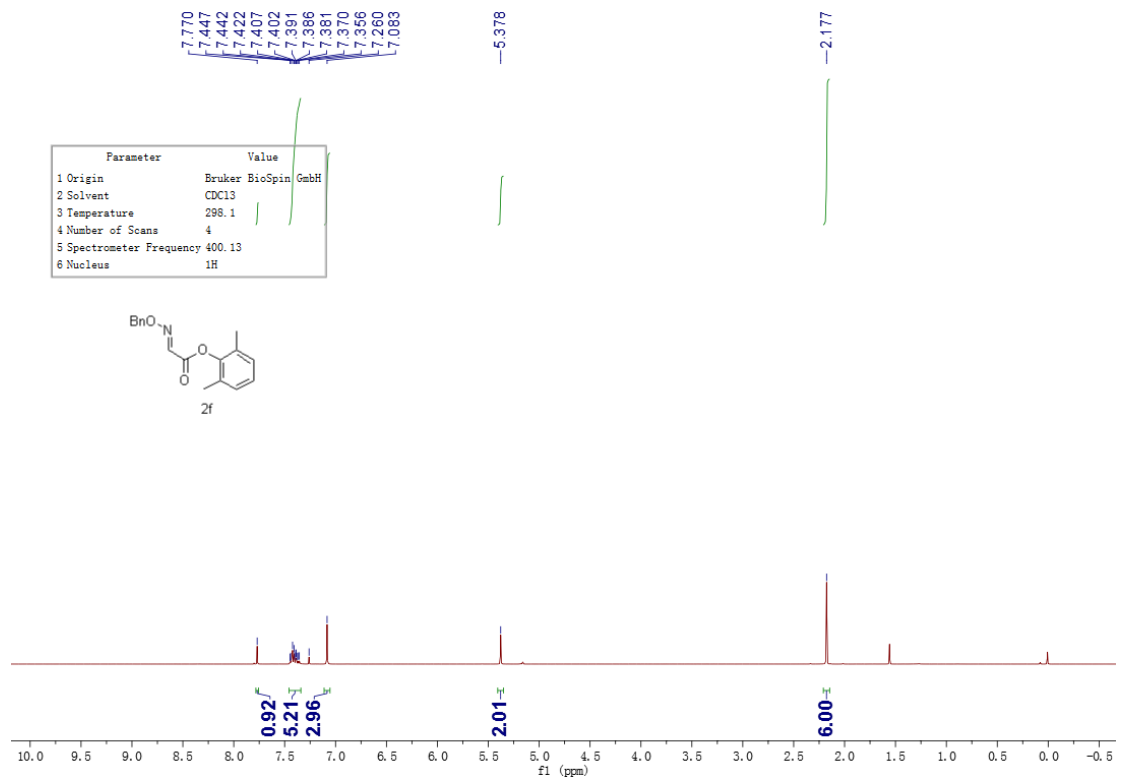



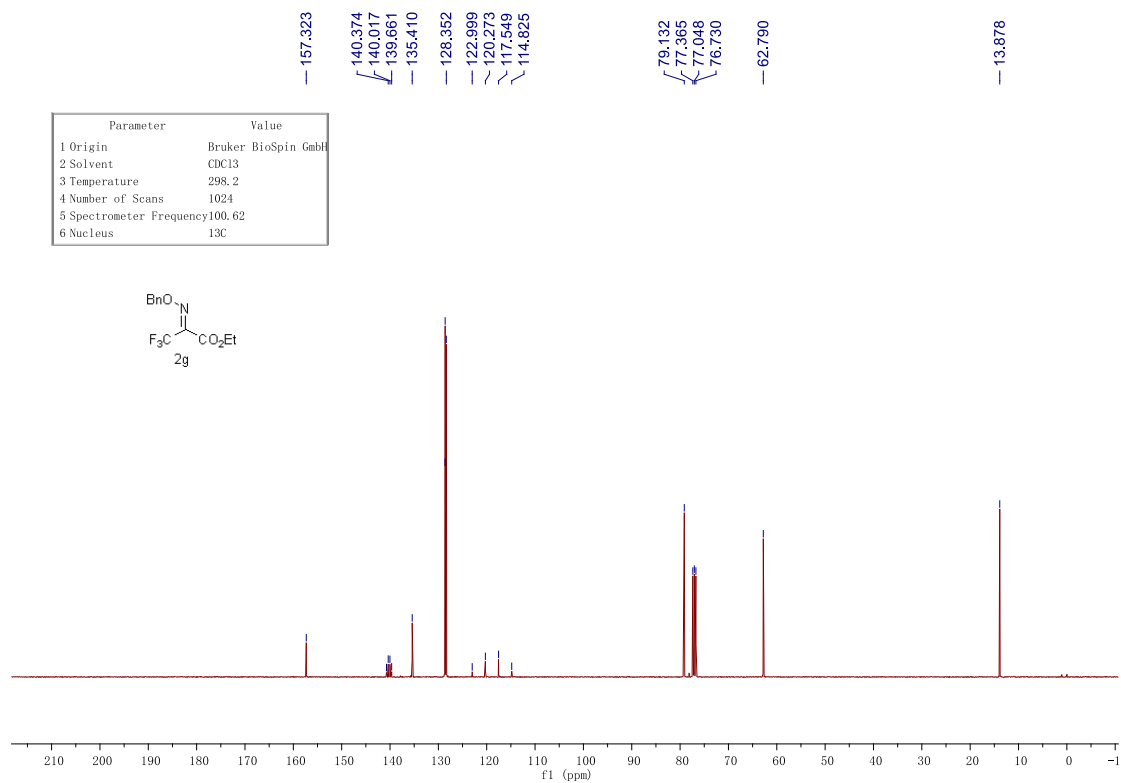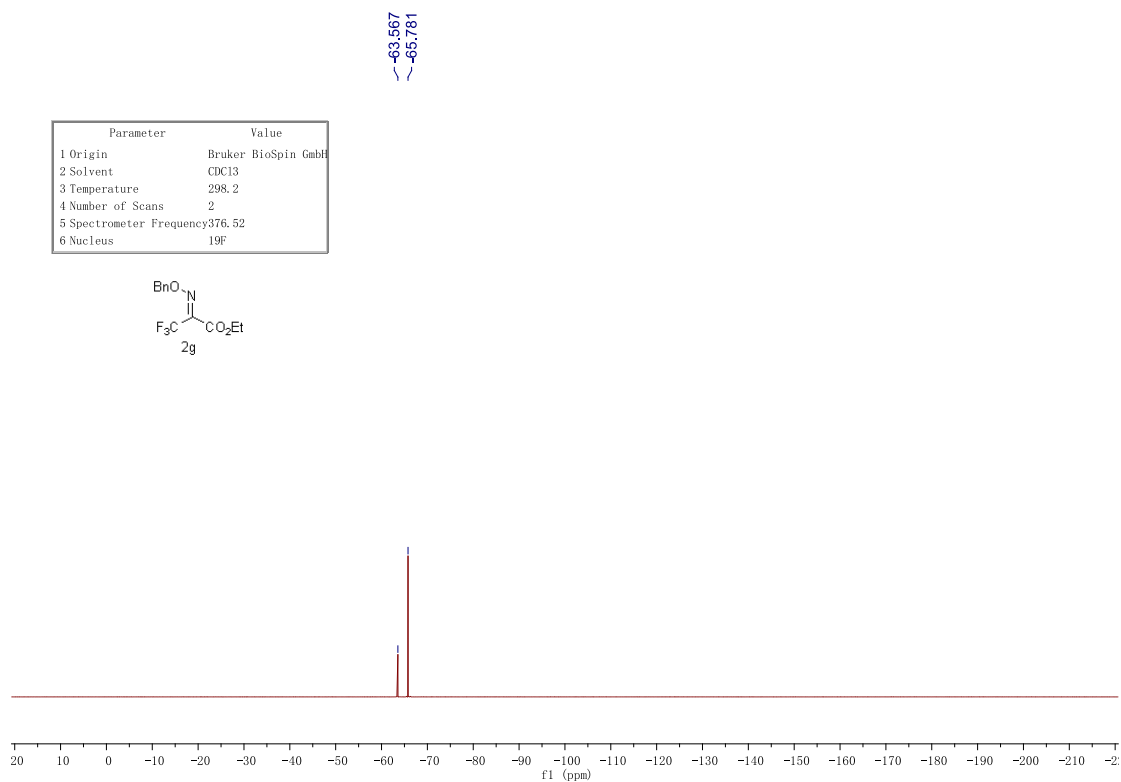

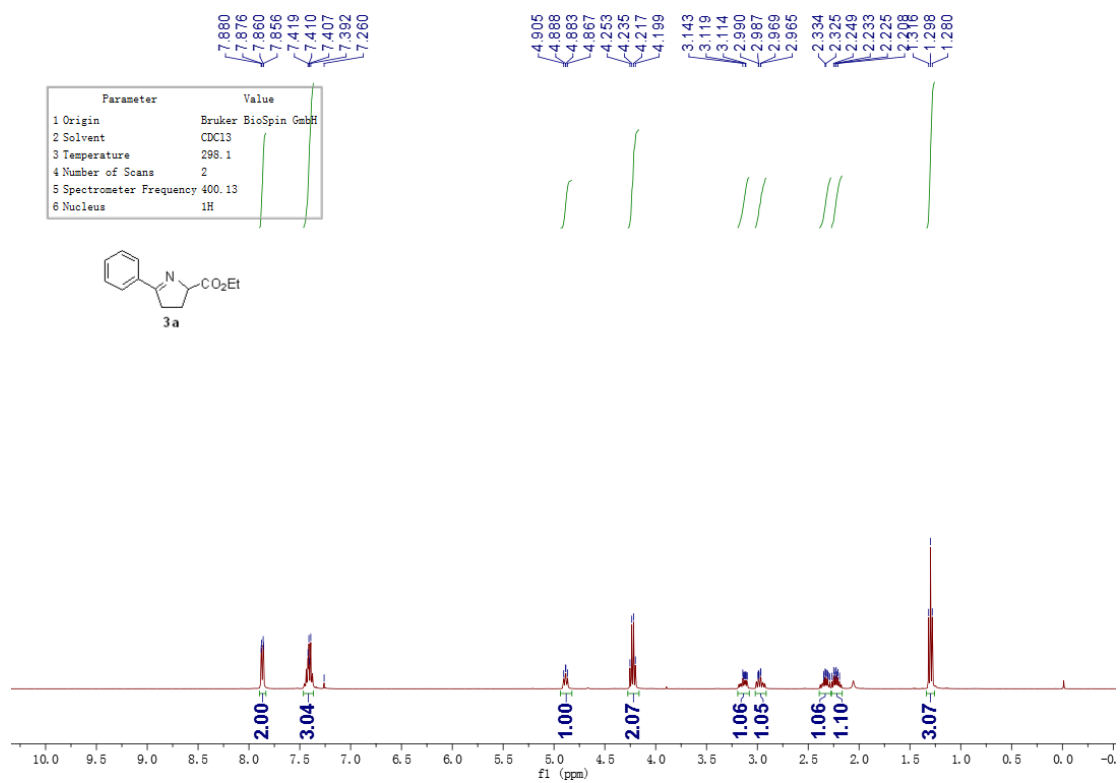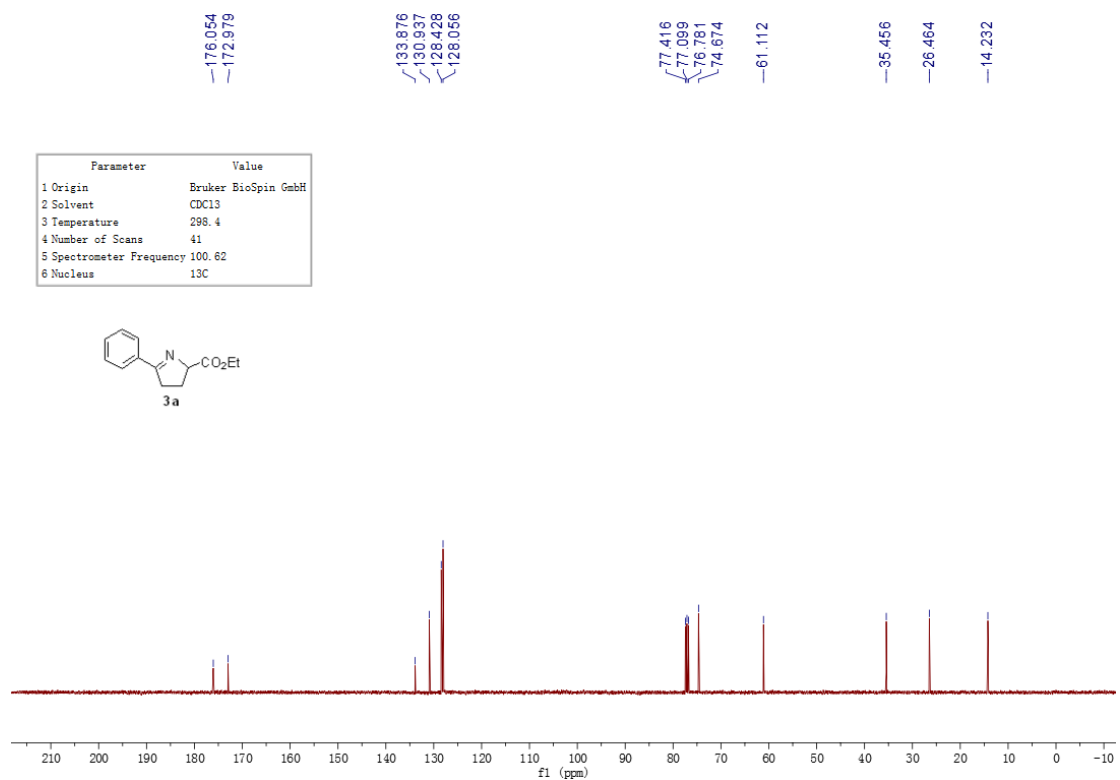



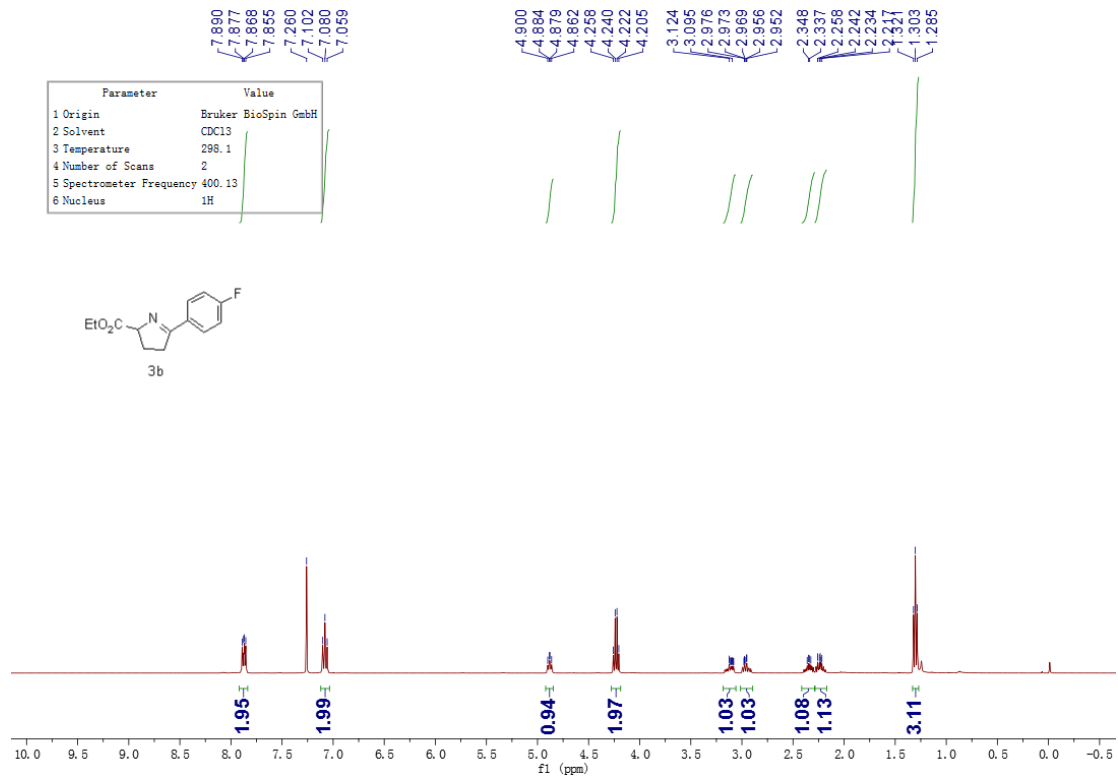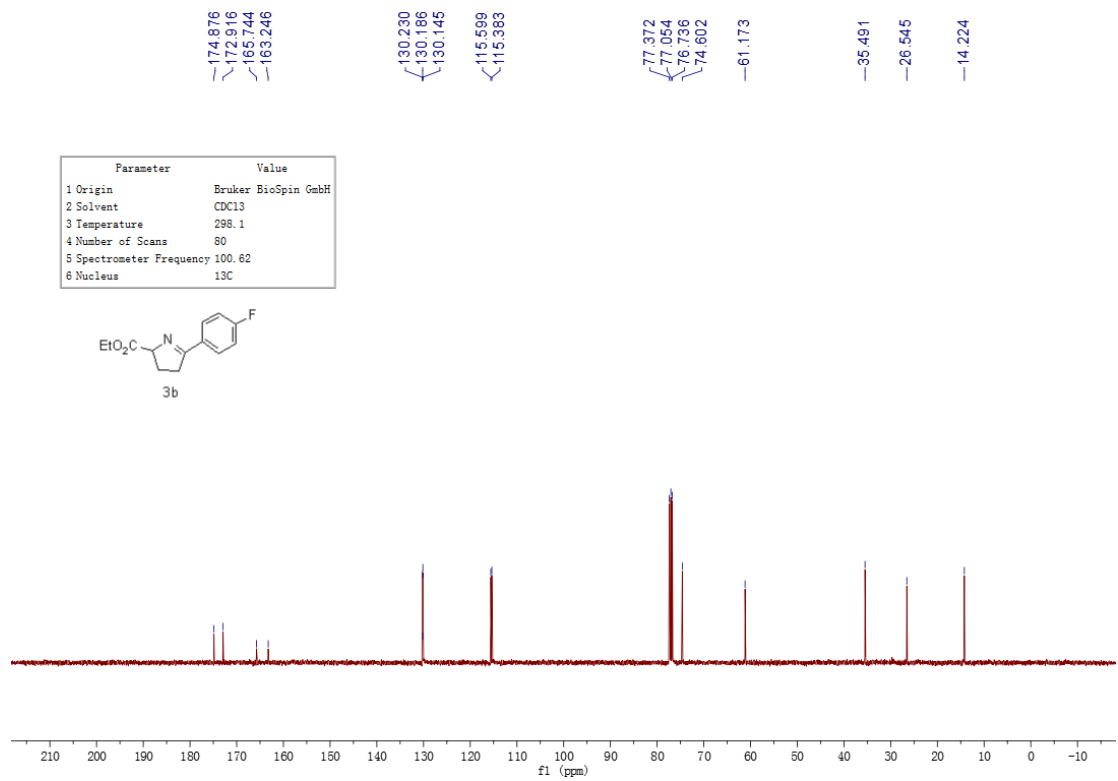

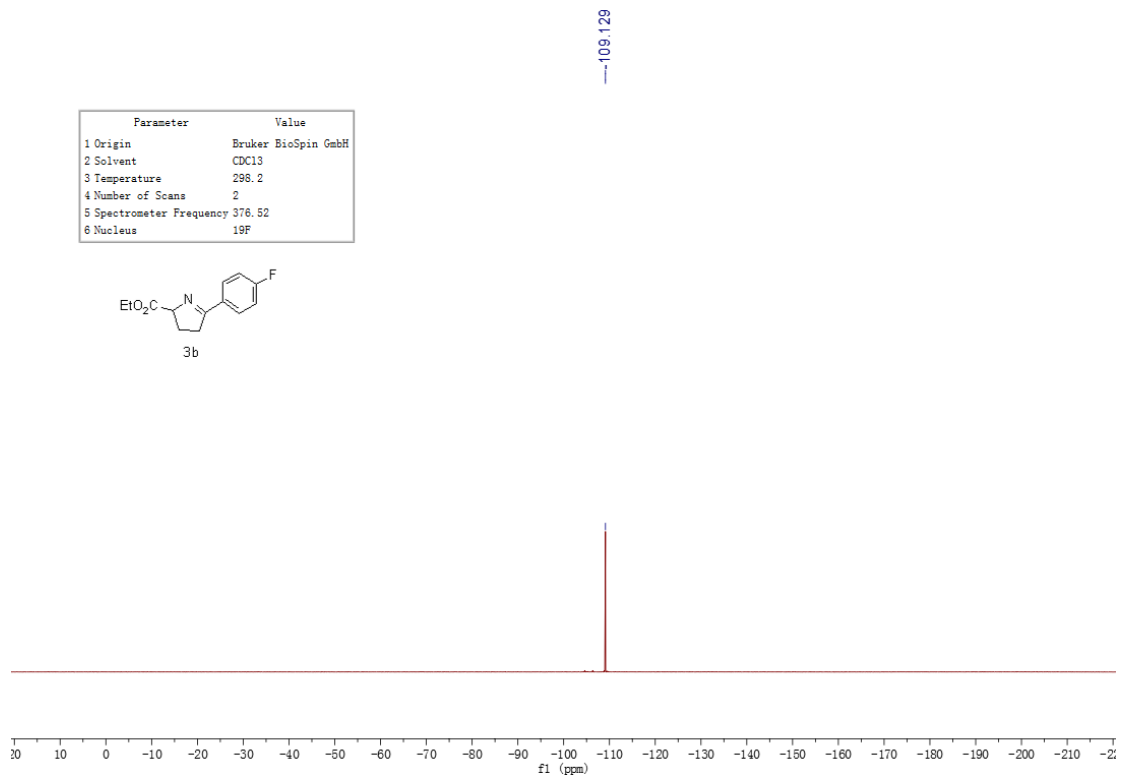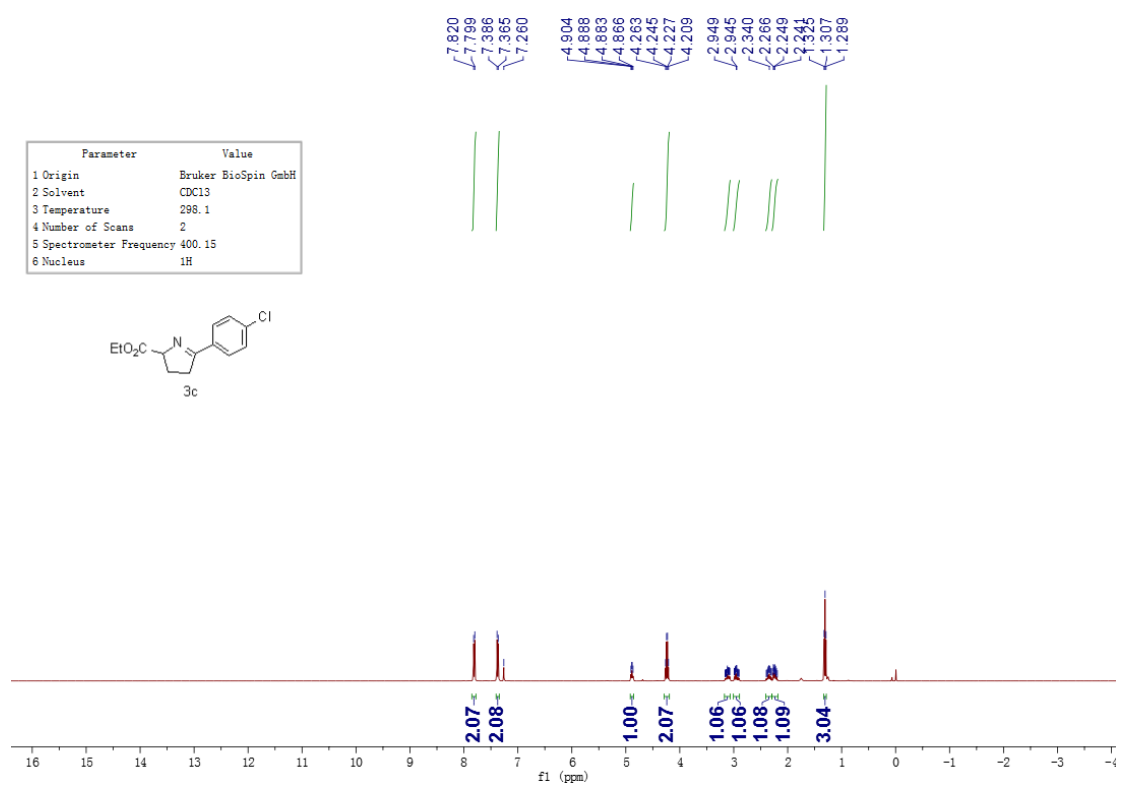

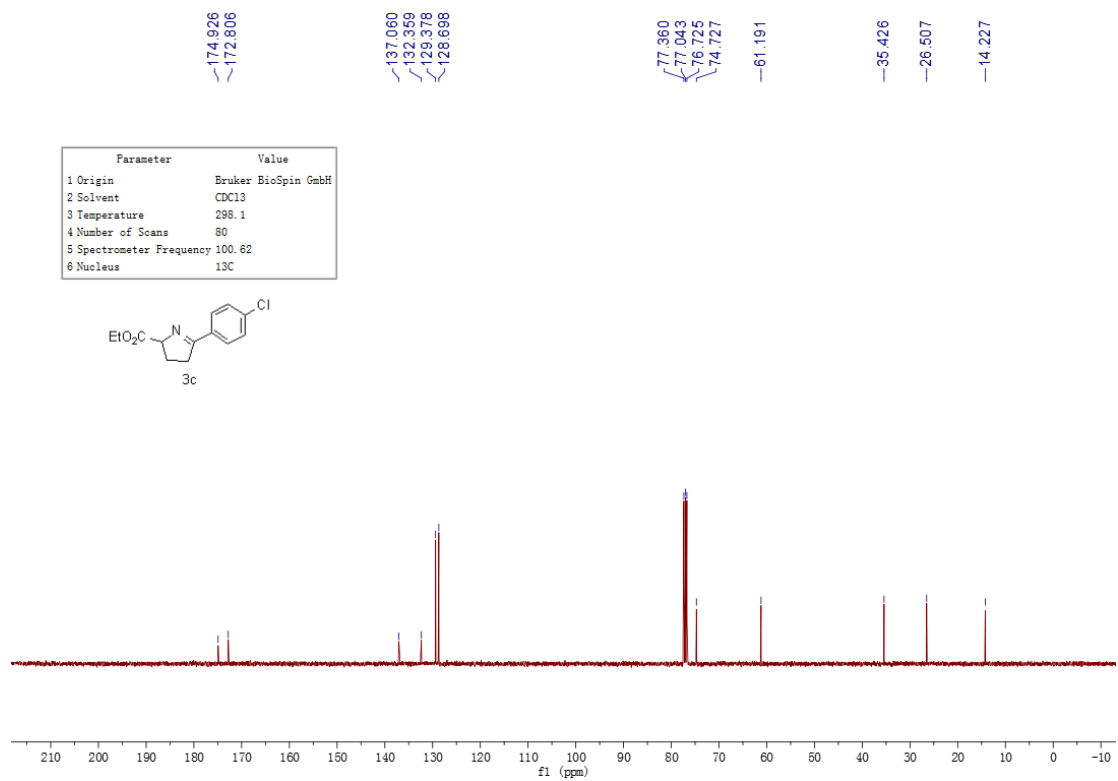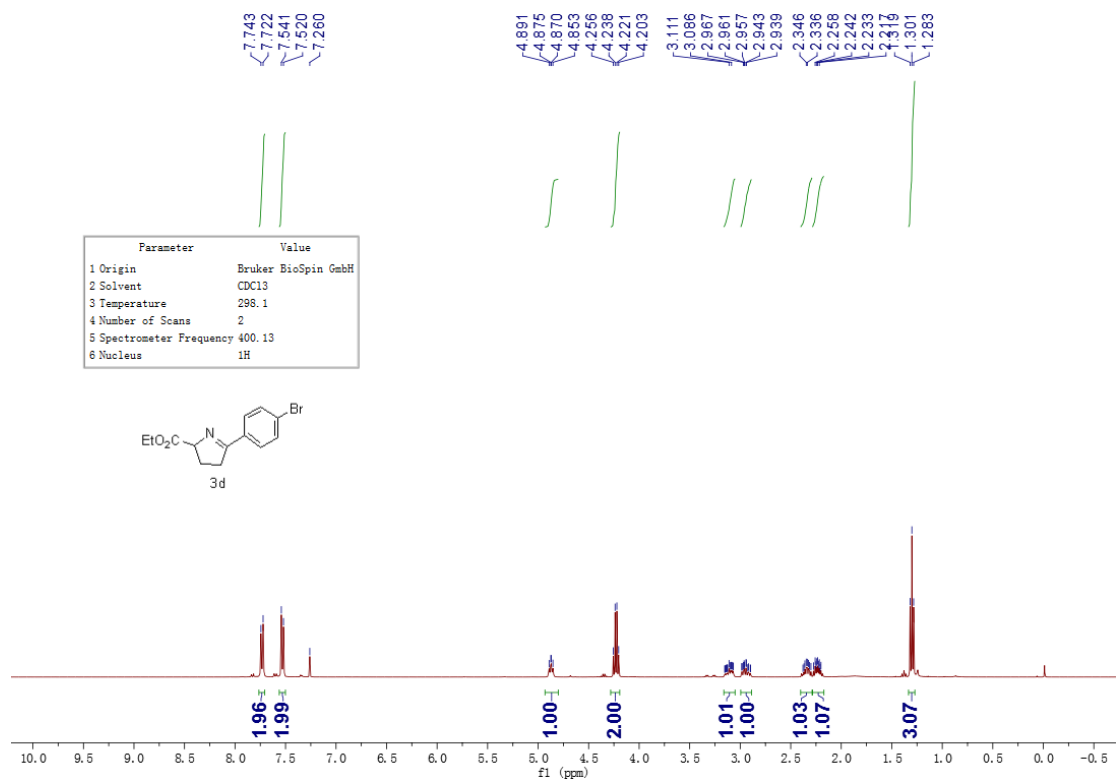

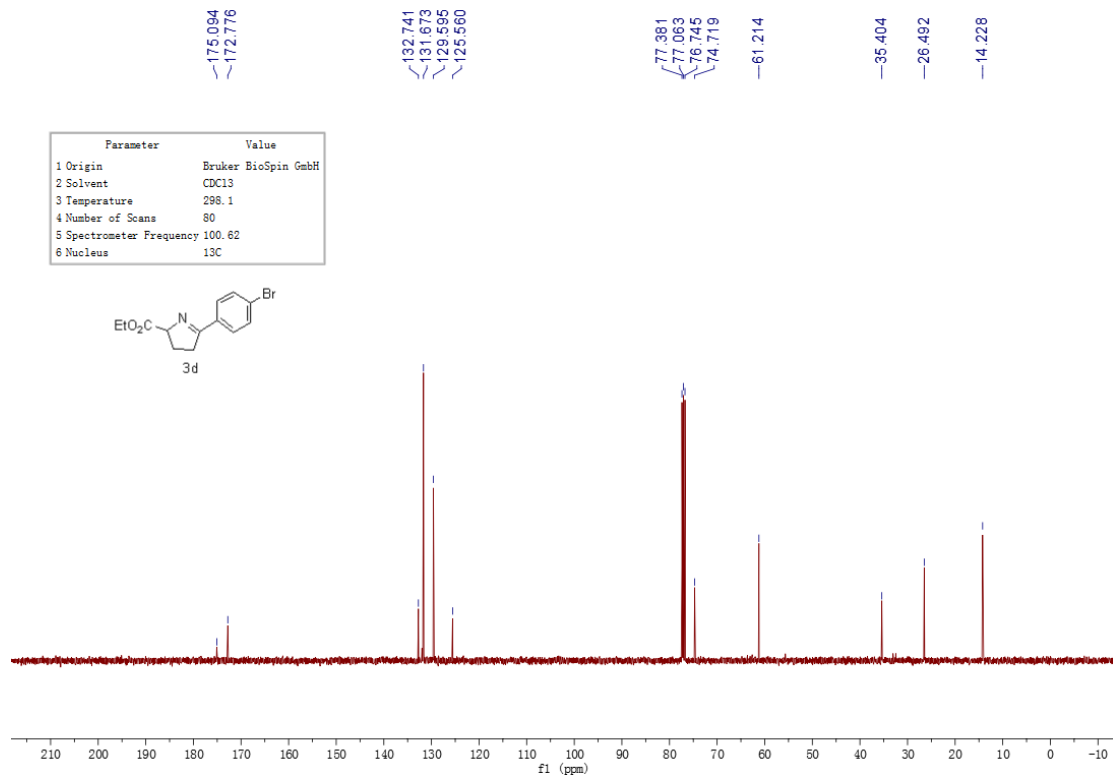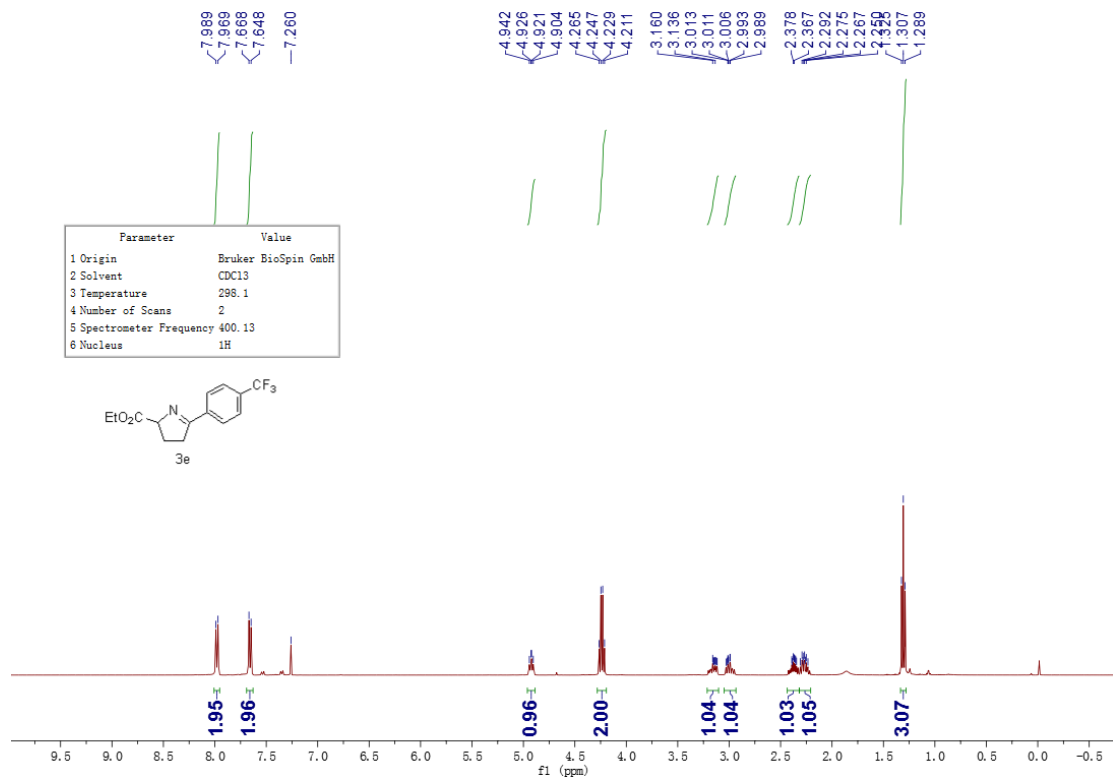

174.953  
172.617

137.007  
133.011  
132.690  
132.367  
132.041  
128.374  
127.938  
126.428  
125.393  
125.228  
122.520  
119.810

77.366  
77.048  
76.730  
74.833

61.285

35.546

26.439

14.197

| Parameter                | Value               |
|--------------------------|---------------------|
| 1 Origin                 | Bruker BioSpin GmbH |
| 2 Solvent                | CDCl3               |
| 3 Temperature            | 298.1               |
| 4 Number of Scans        | 1024                |
| 5 Spectrometer Frequency | 100.62              |
| 6 Nucleus                | 13C                 |

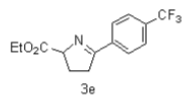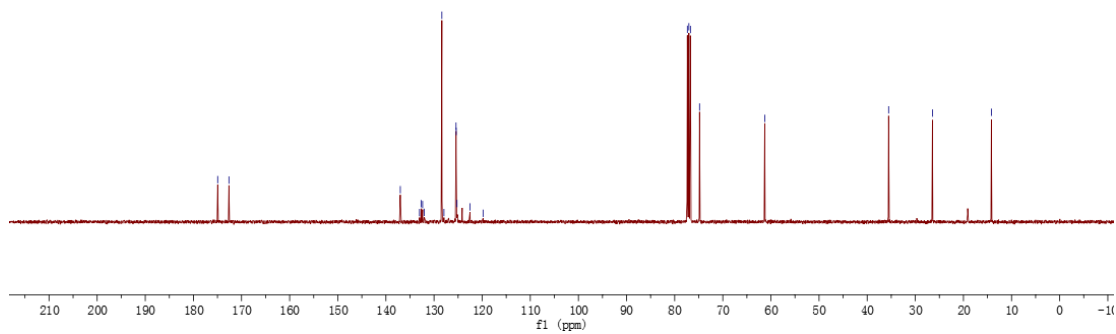

62.896

| Parameter                | Value               |
|--------------------------|---------------------|
| 1 Origin                 | Bruker BioSpin GmbH |
| 2 Solvent                | CDCl3               |
| 3 Temperature            | 297.9               |
| 4 Number of Scans        | 2                   |
| 5 Spectrometer Frequency | 376.52              |
| 6 Nucleus                | 19F                 |

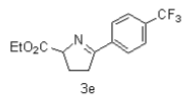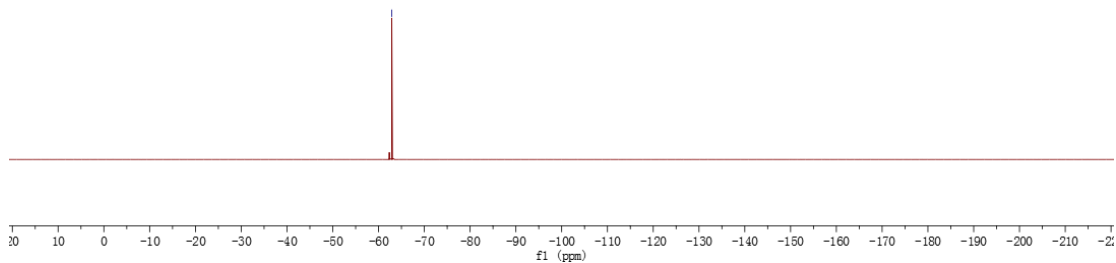

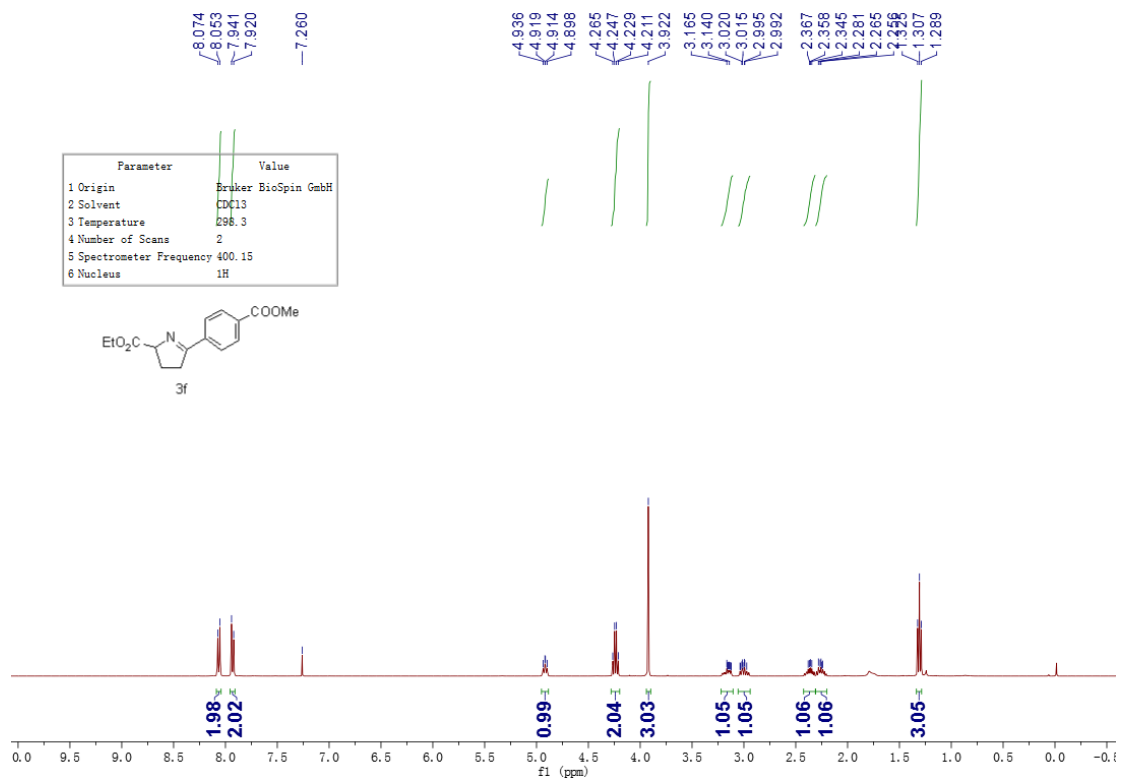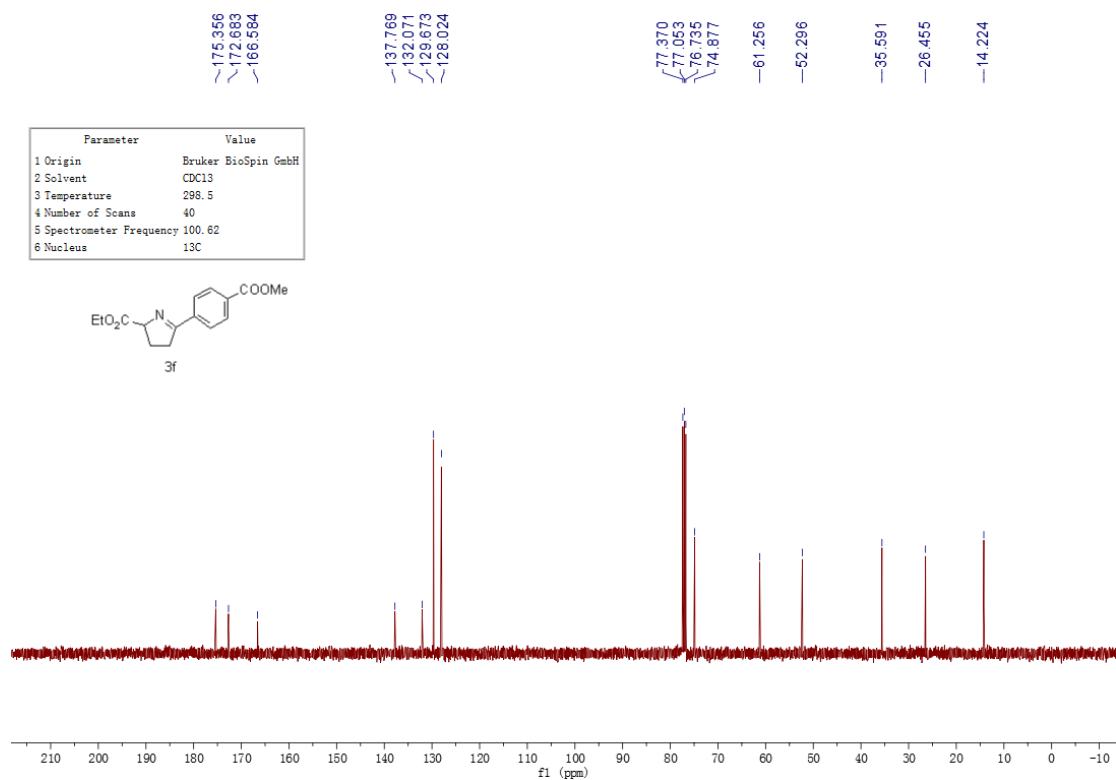

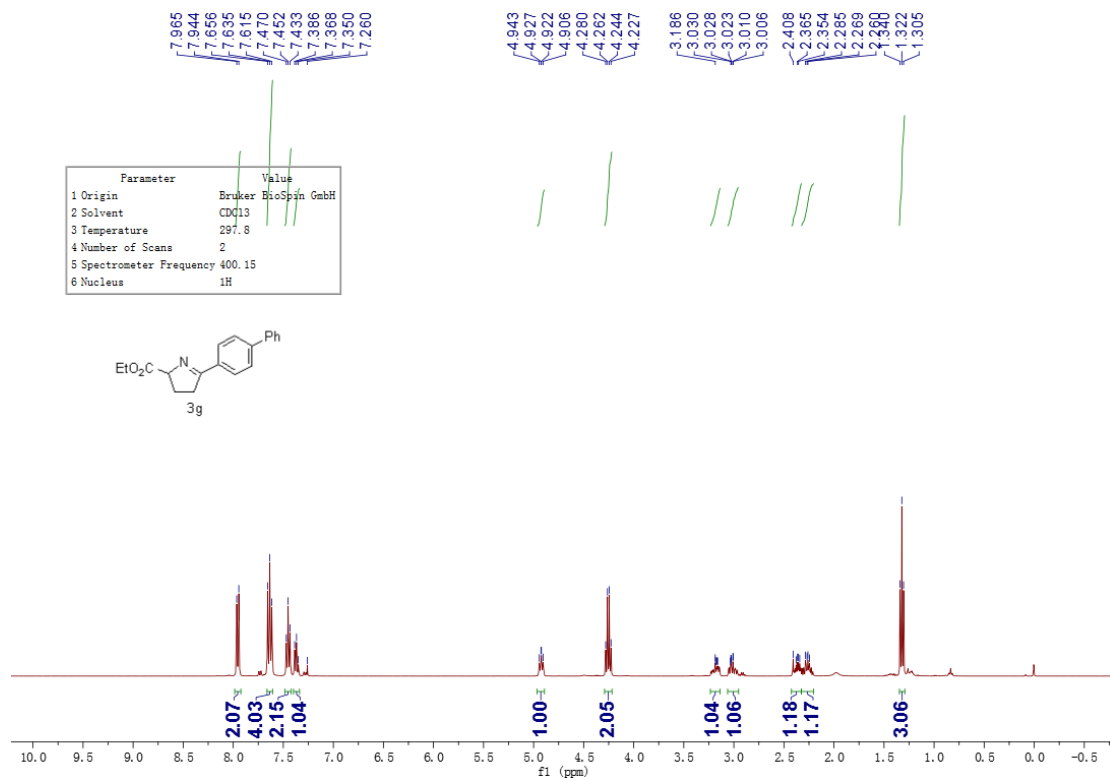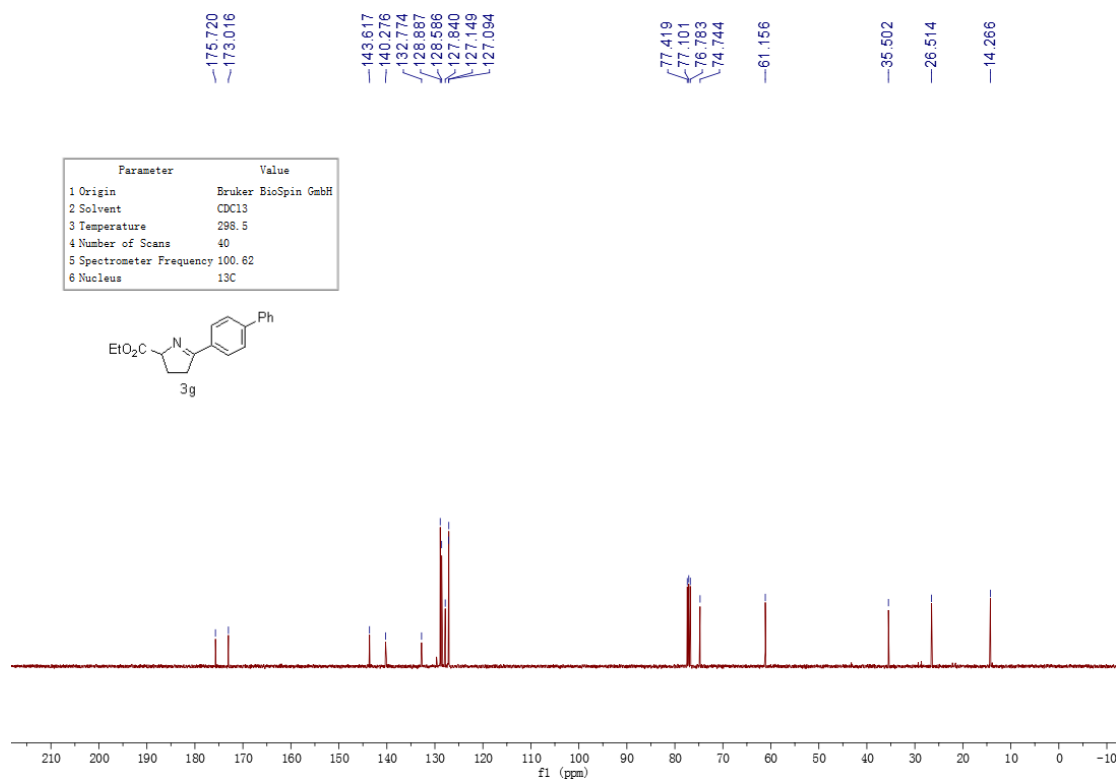

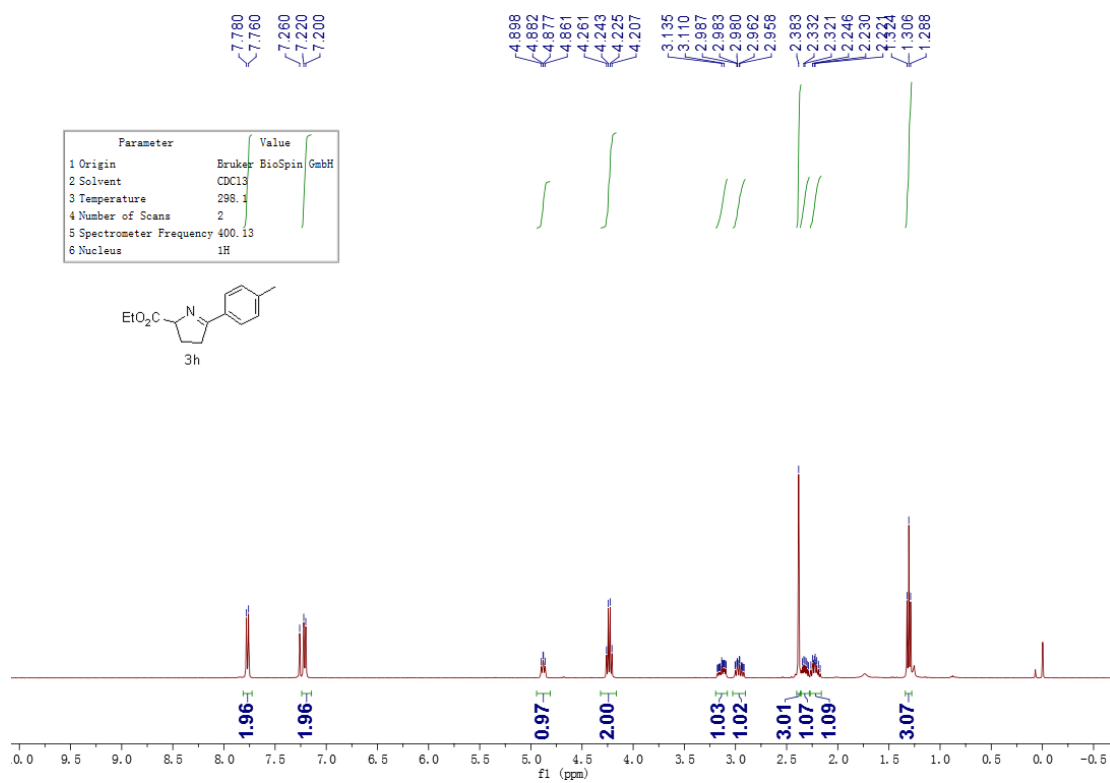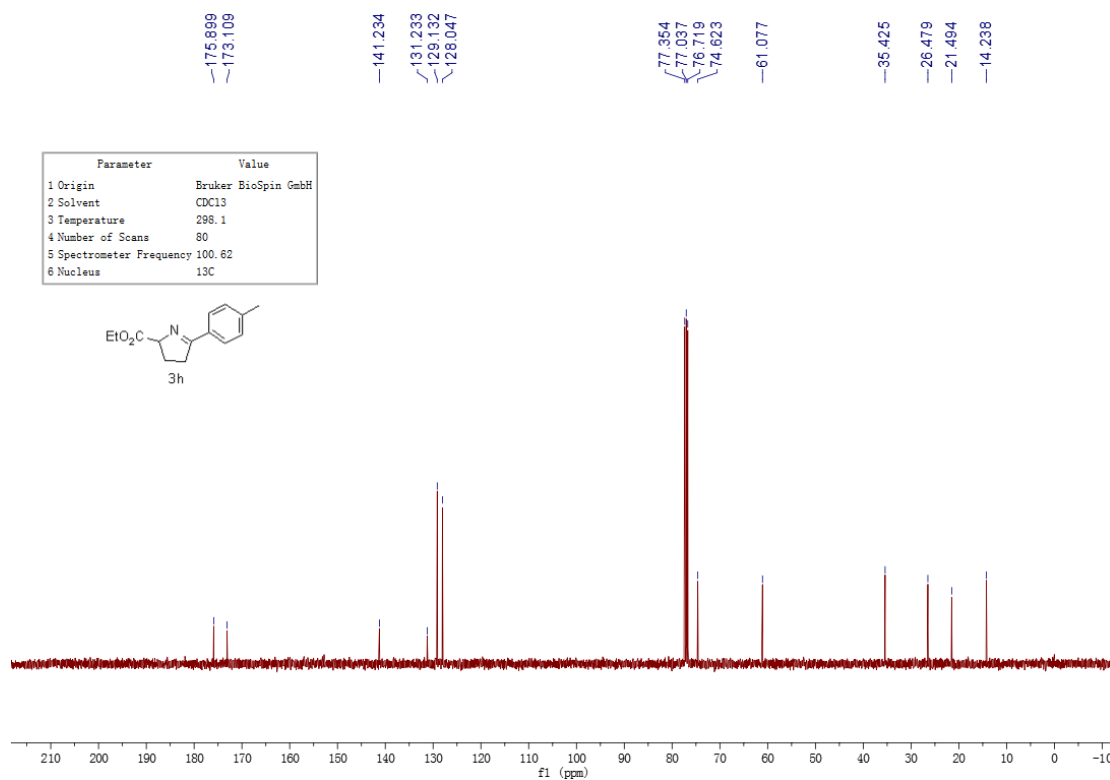



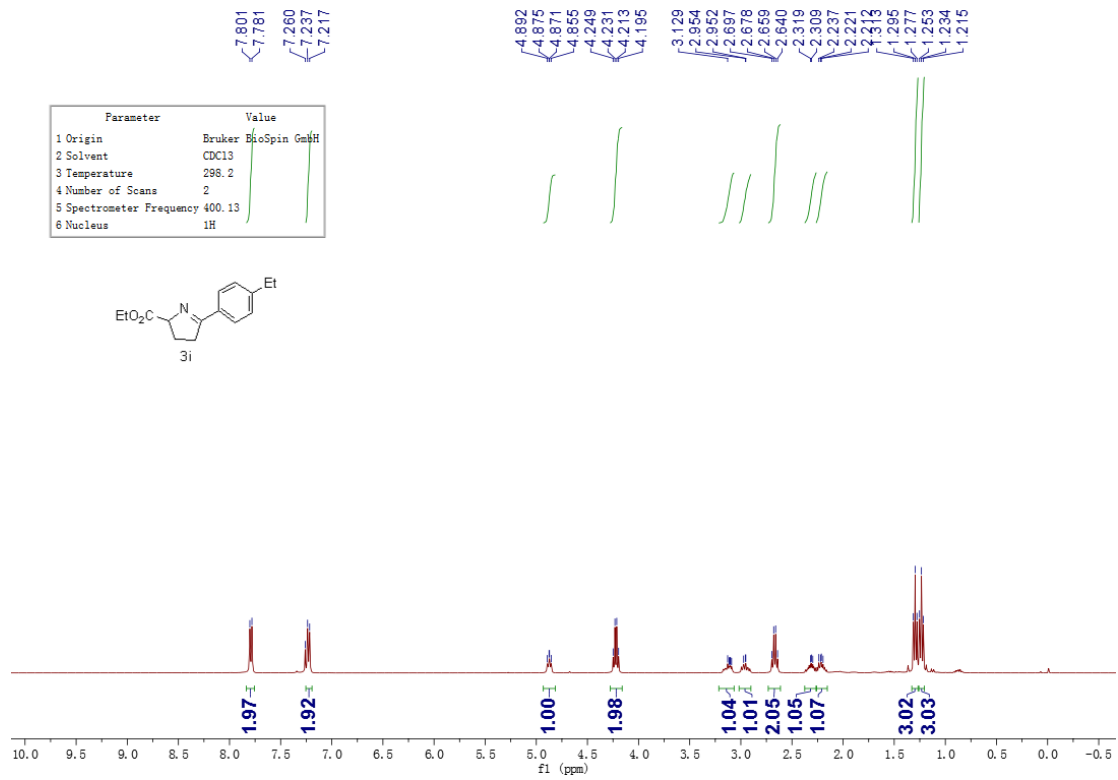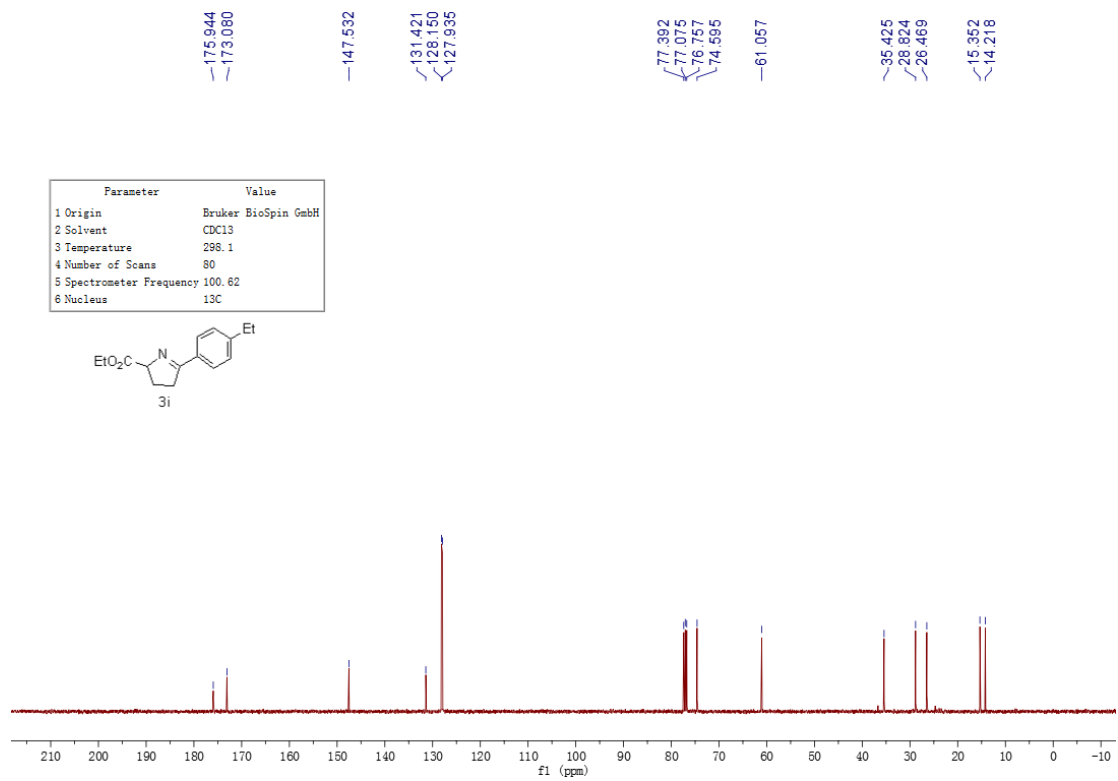

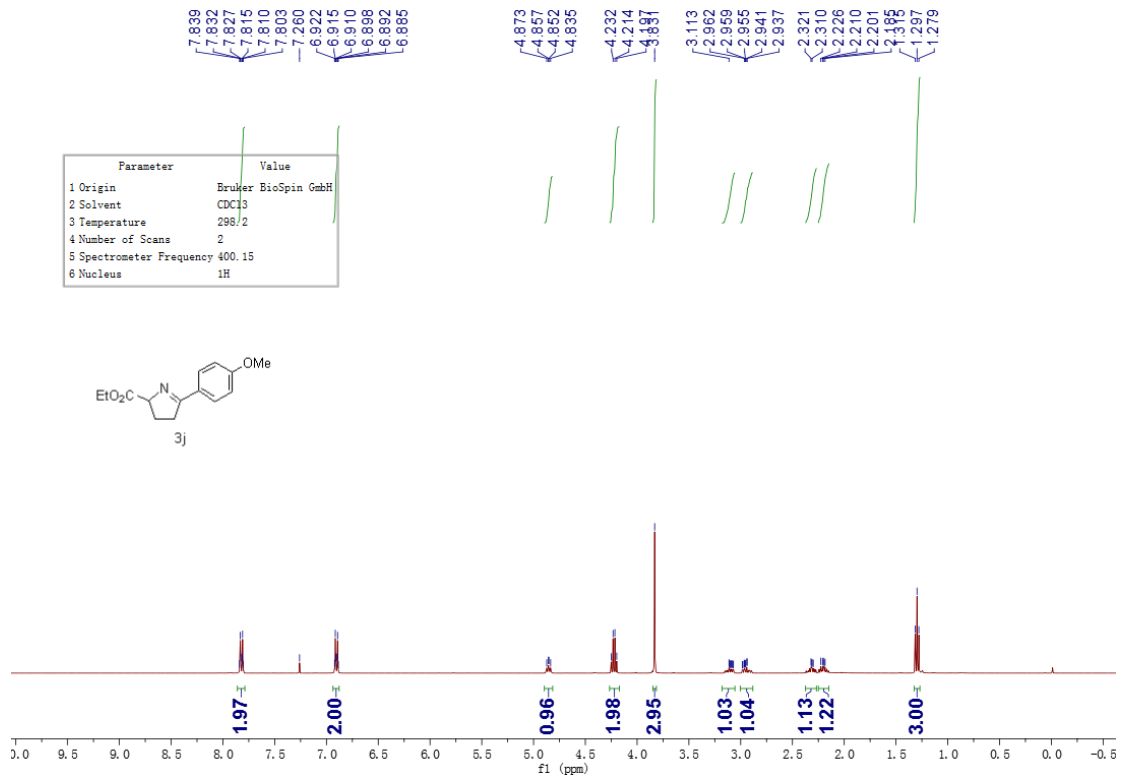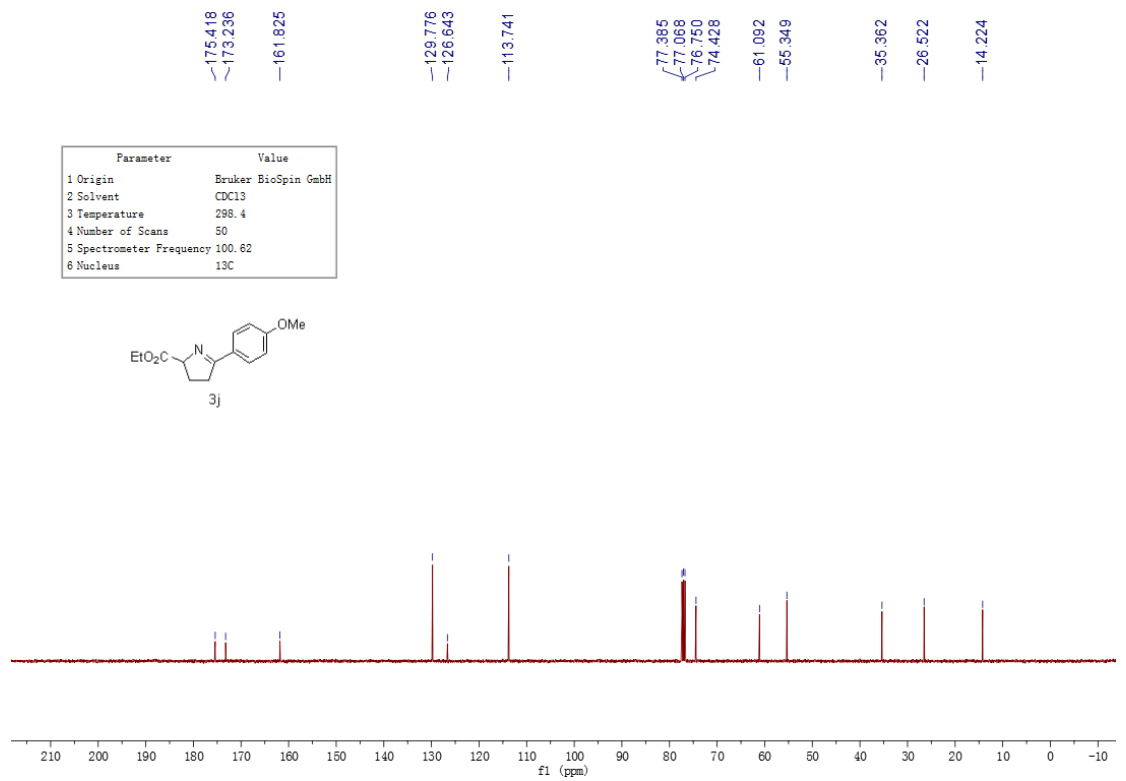

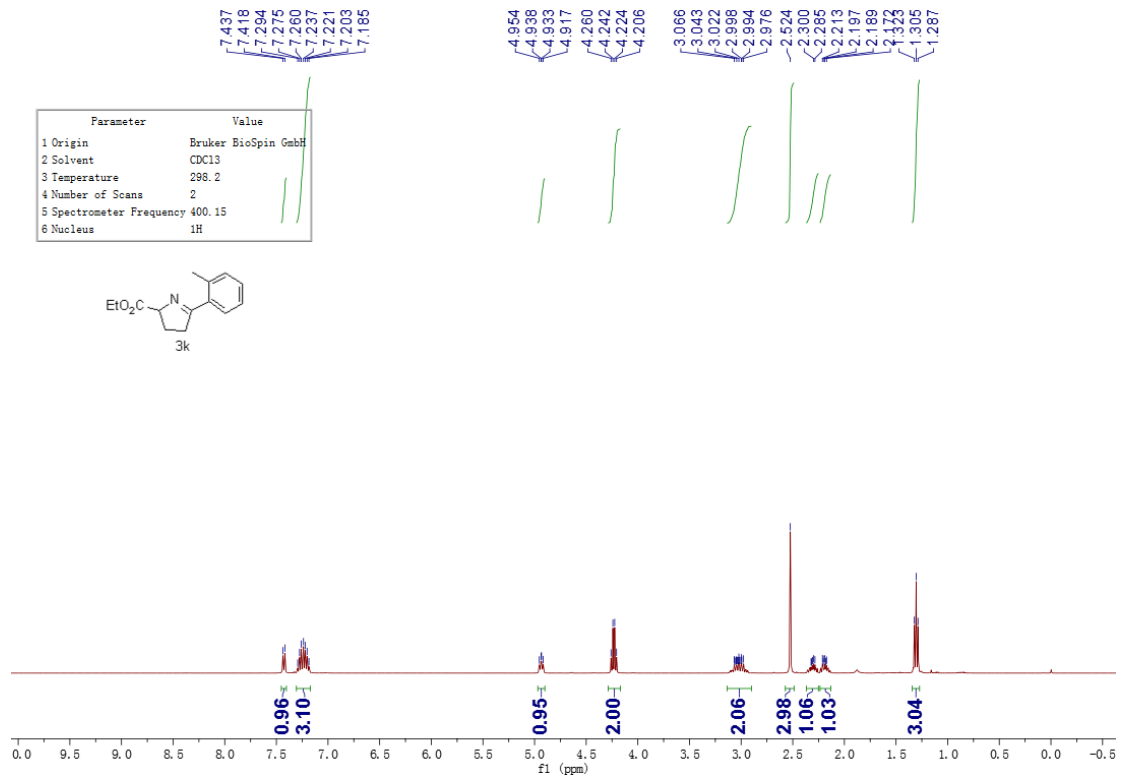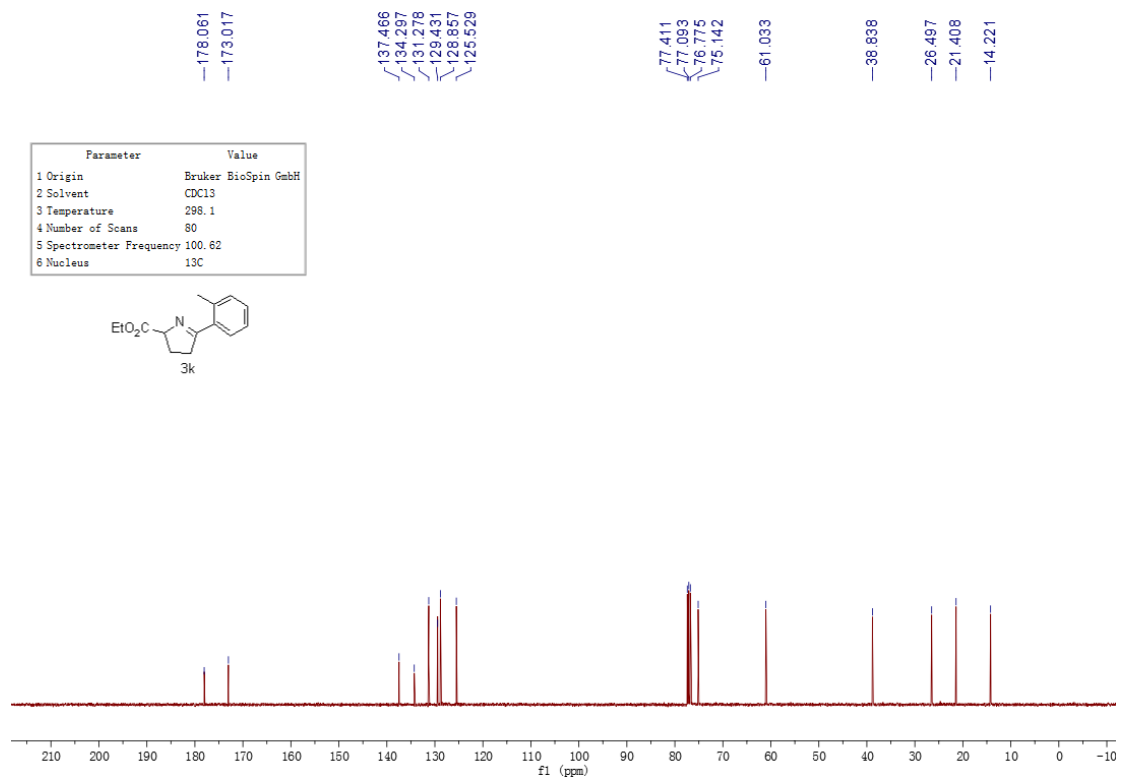

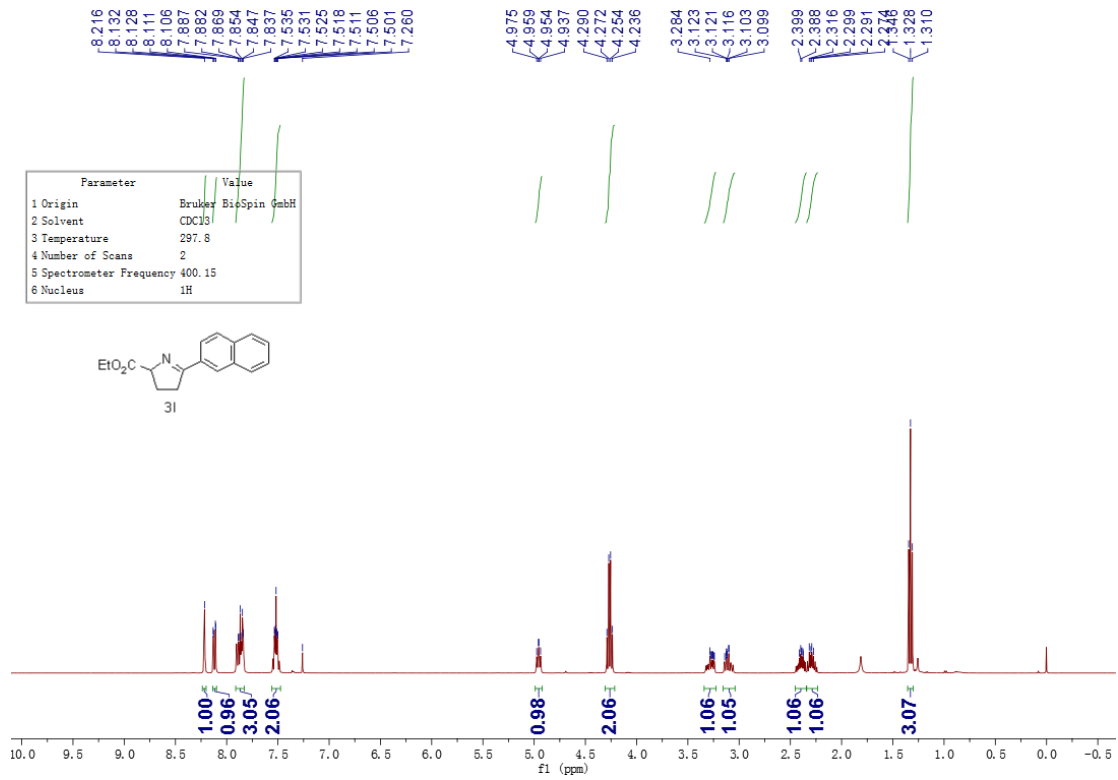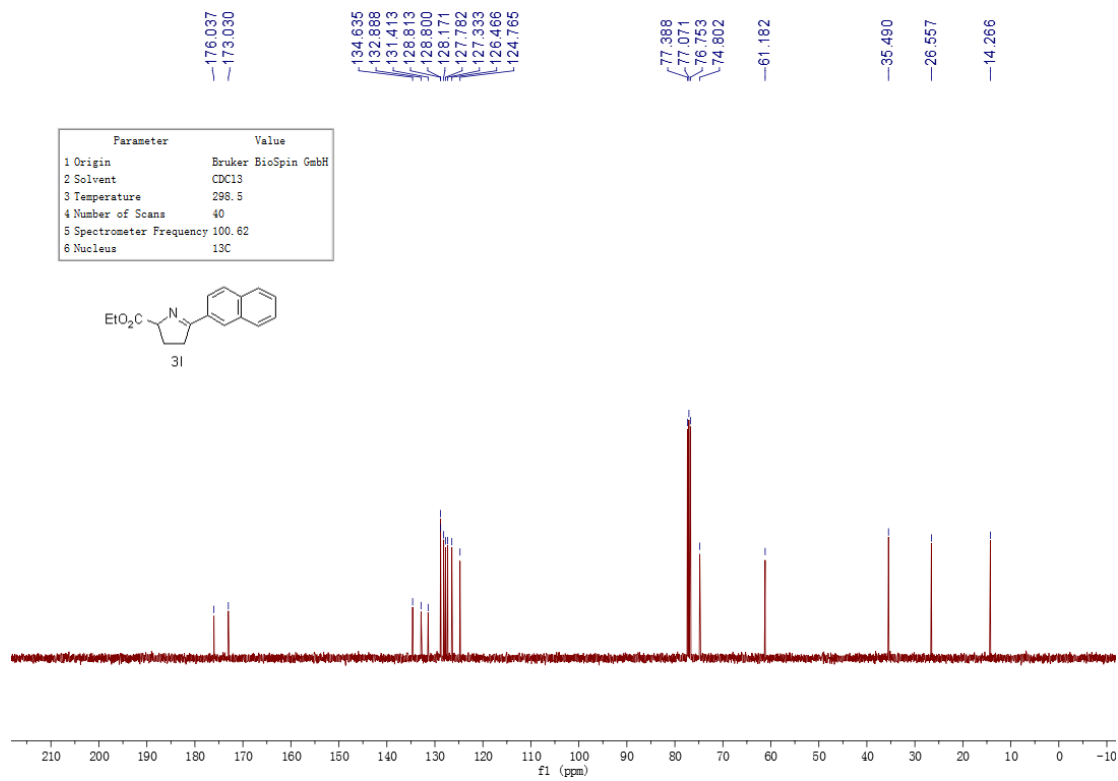

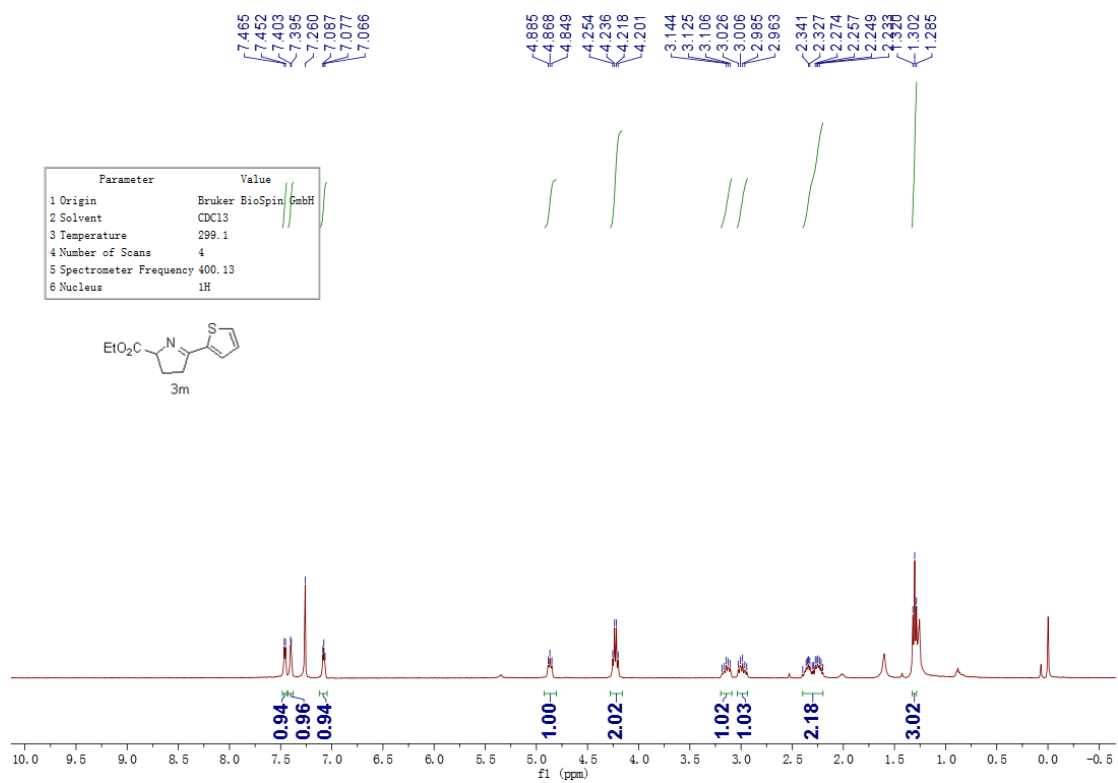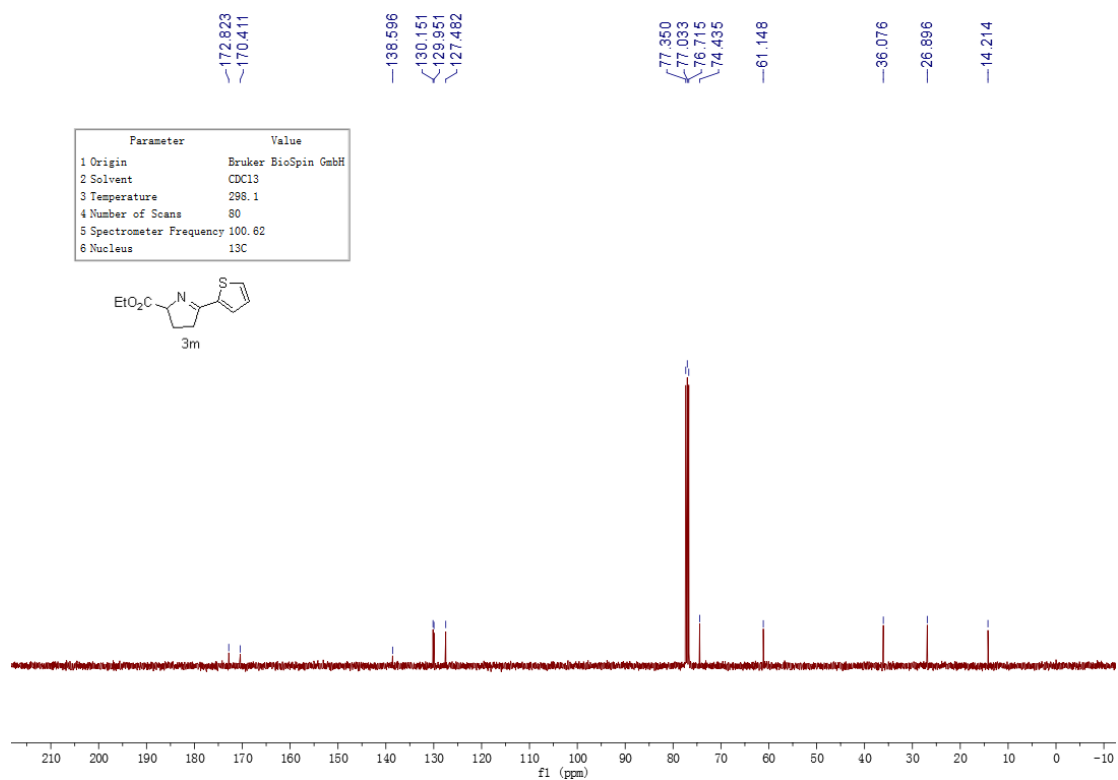

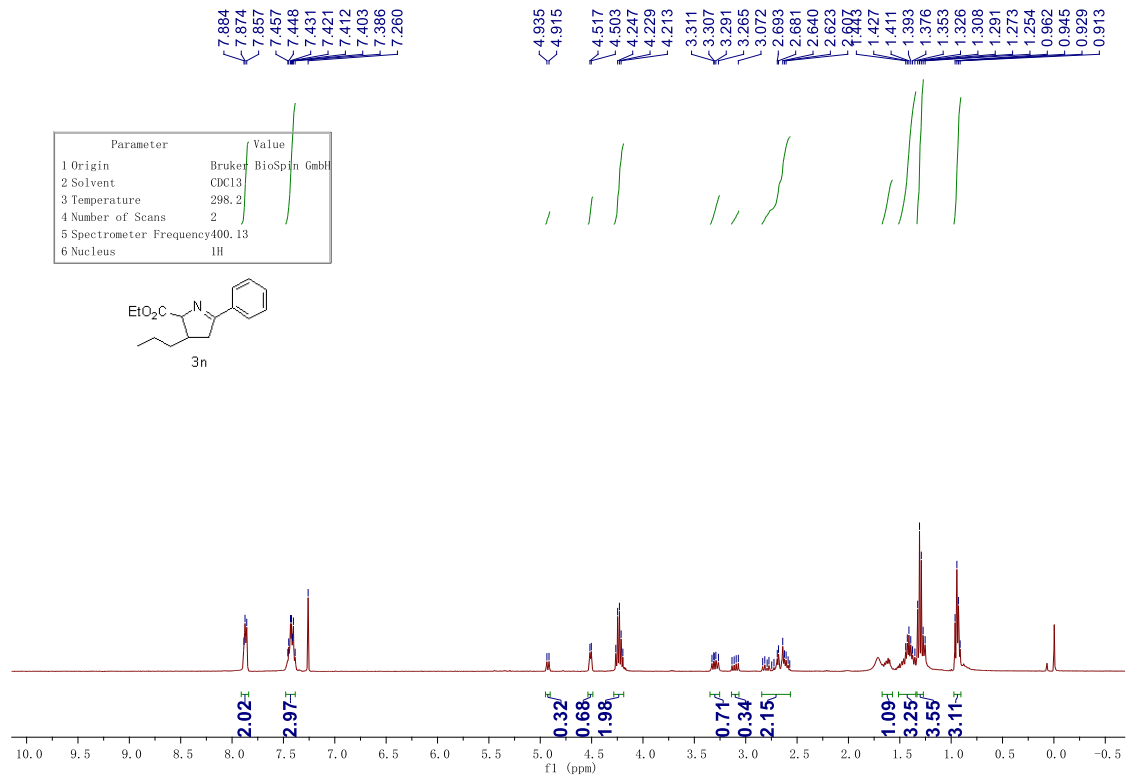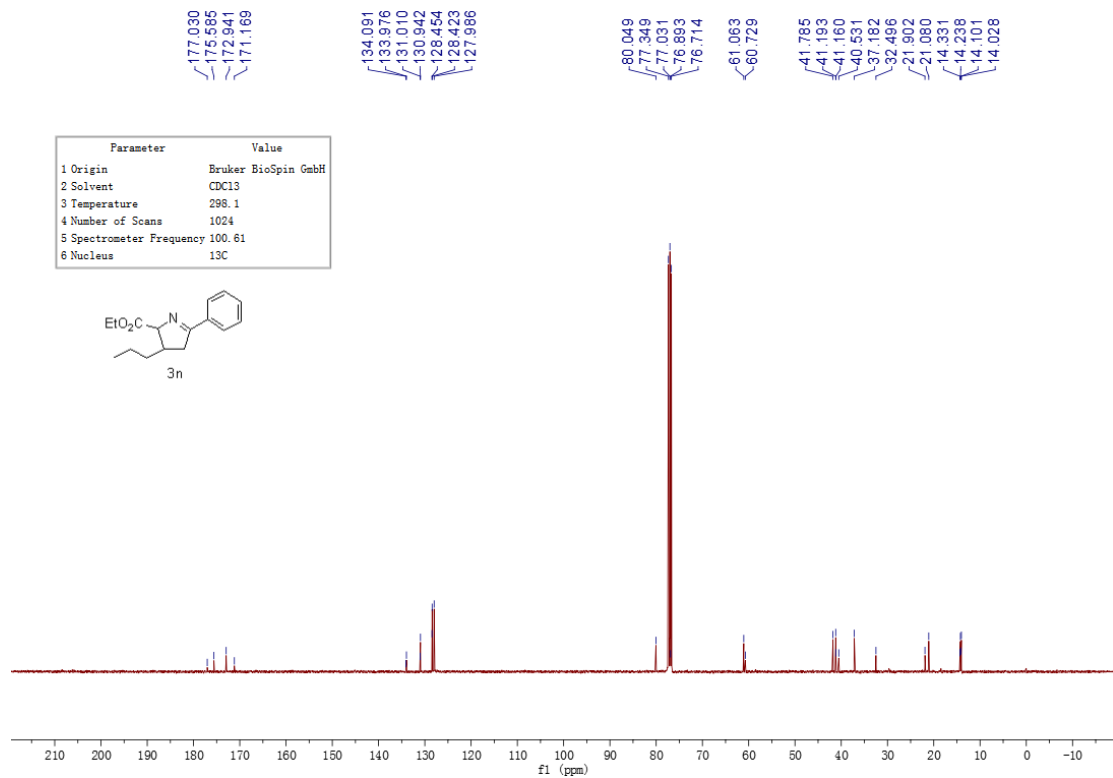

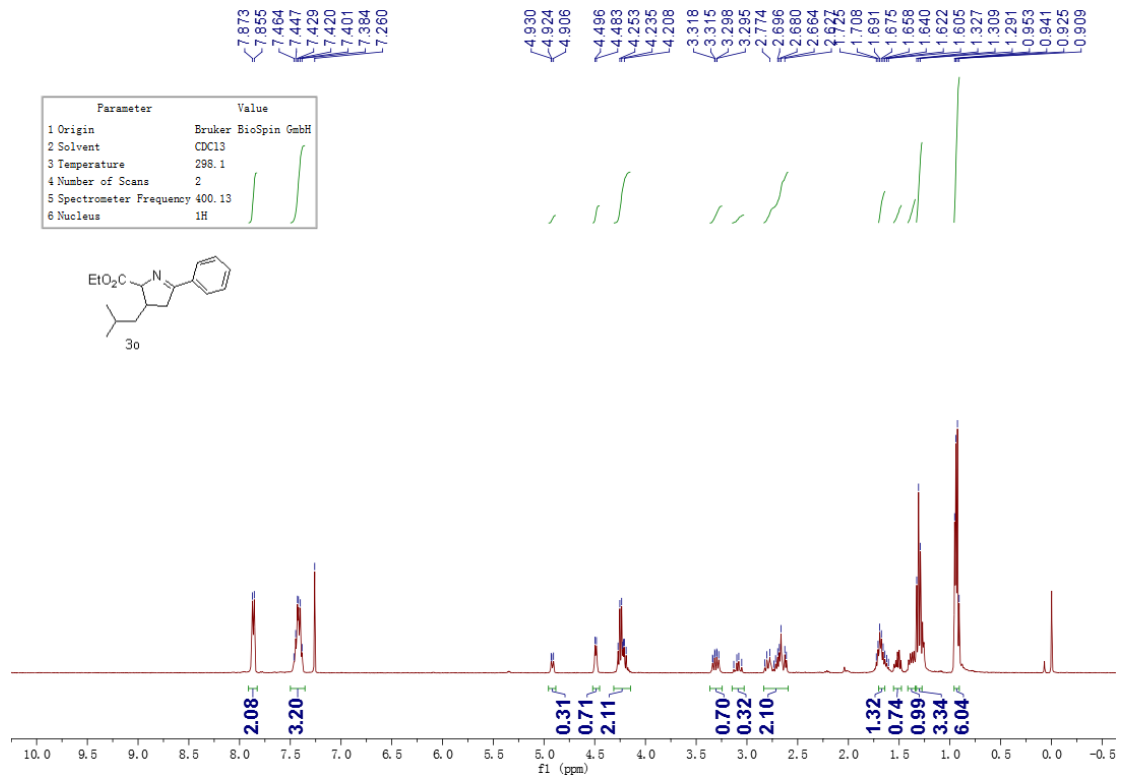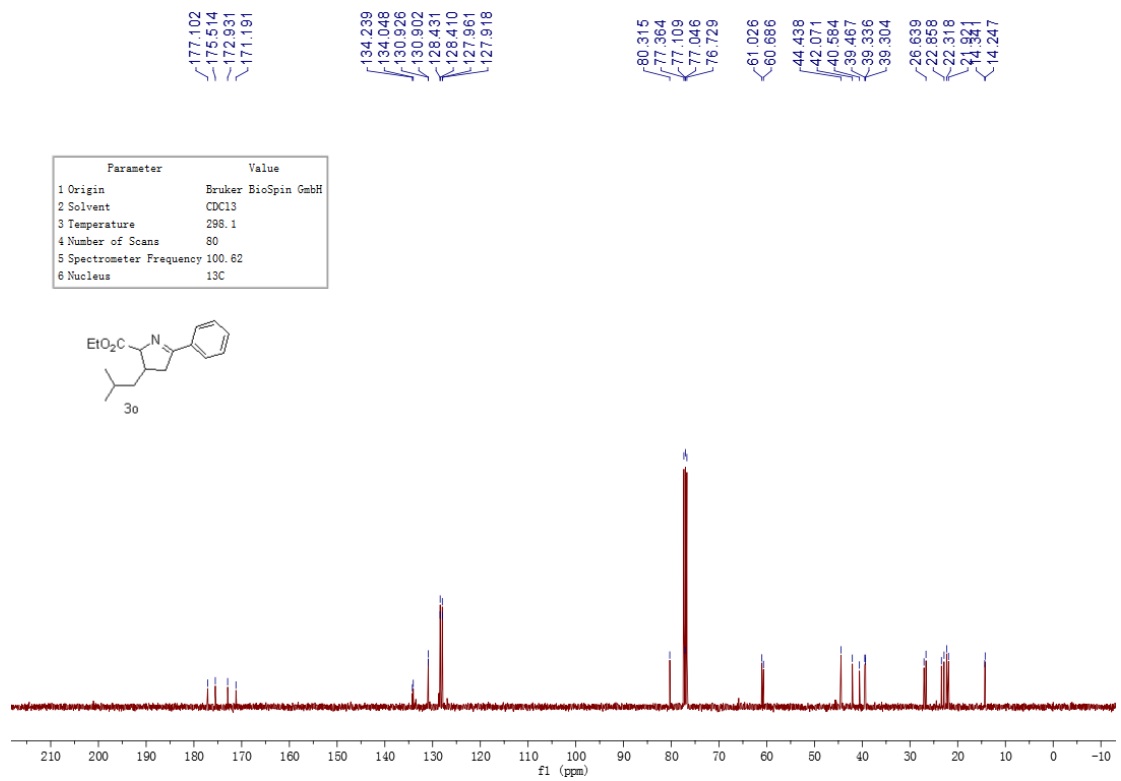

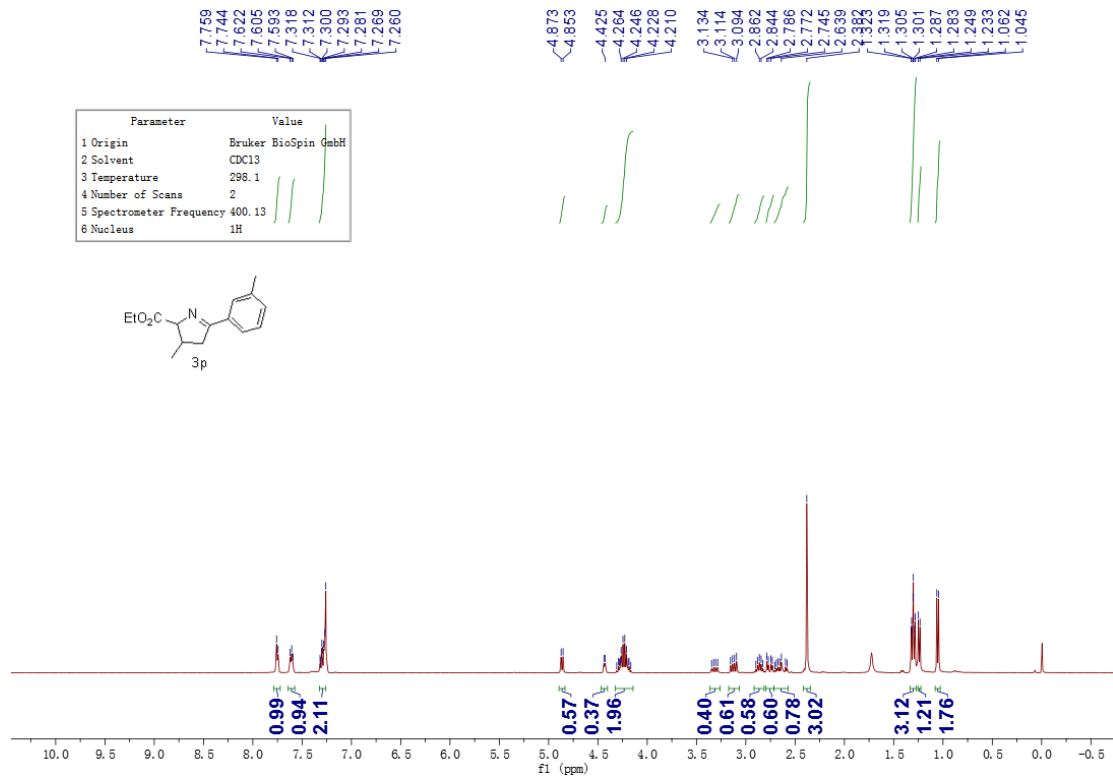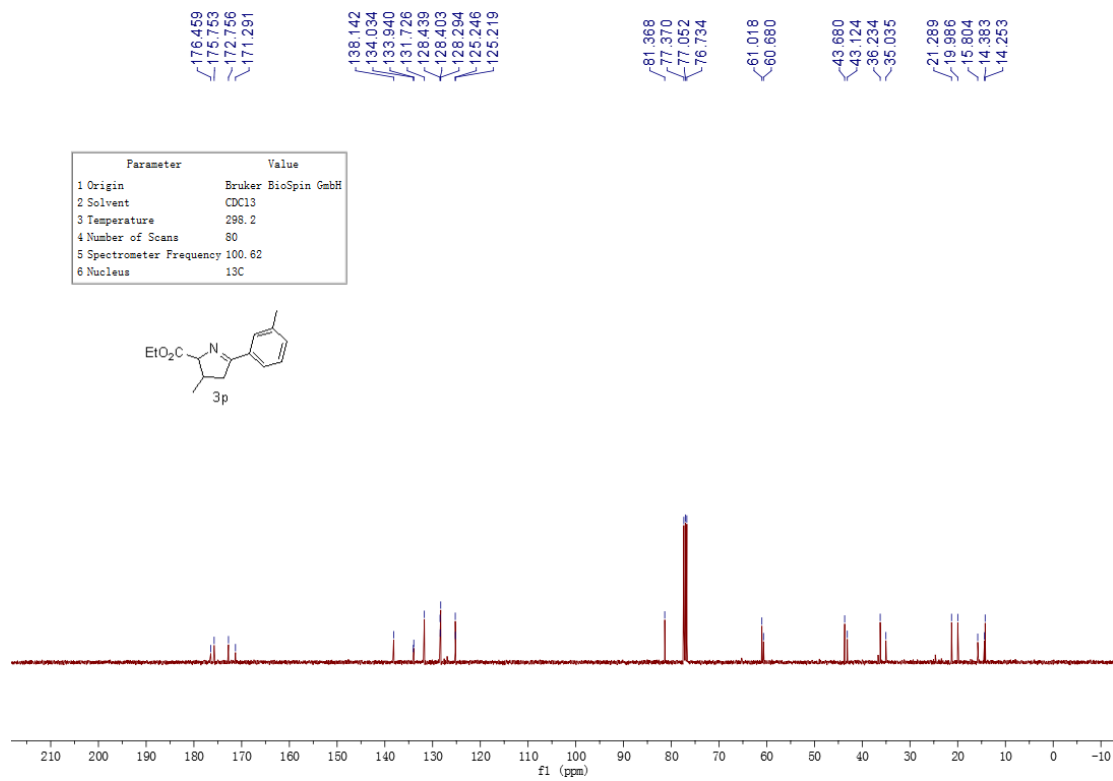



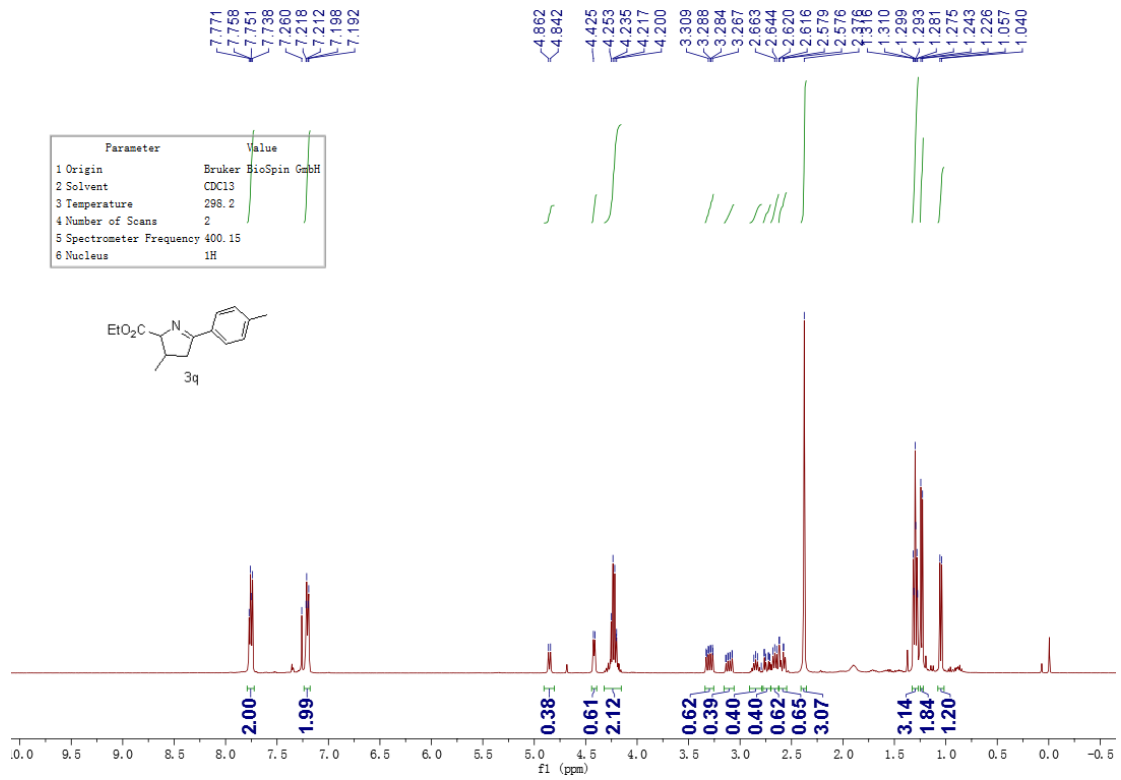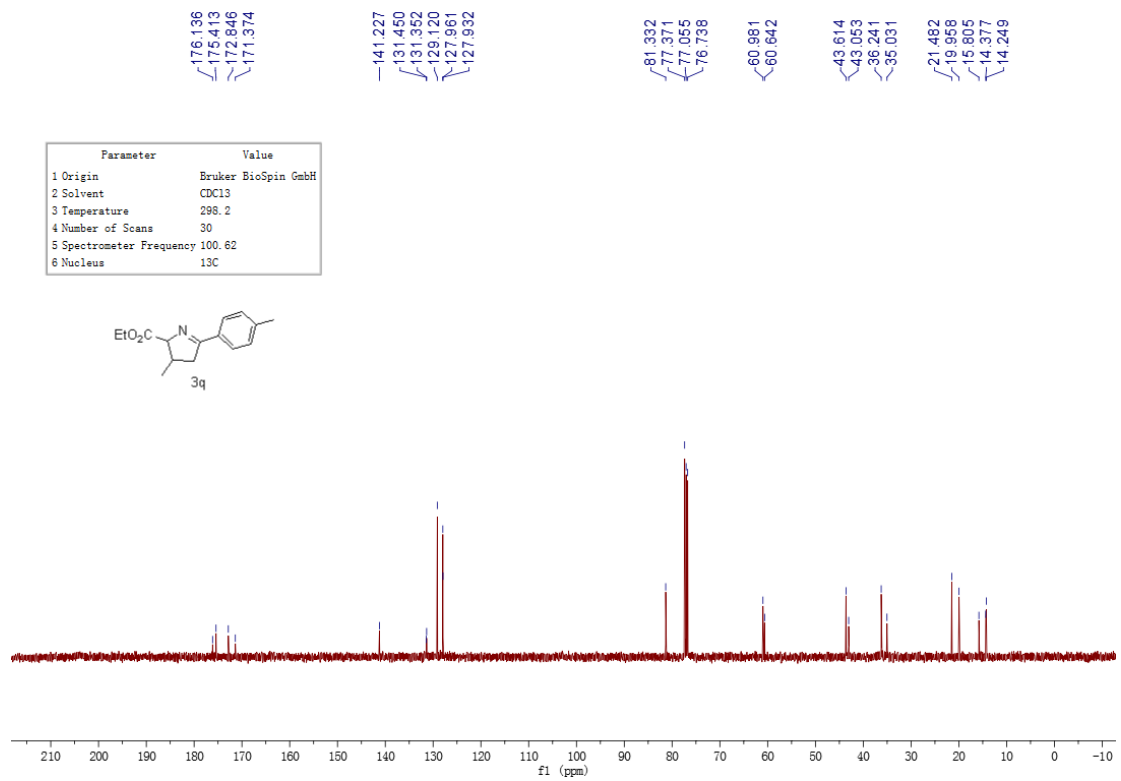

7.993  
7.981  
7.973  
7.861  
7.882  
7.676  
7.660  
7.655  
7.260  
4.919  
4.899  
4.479  
4.464  
4.273  
4.268  
4.255  
4.250  
4.243  
4.237  
4.225  
4.219  
4.219  
3.368  
3.363  
3.346  
3.342  
3.326  
3.321  
3.321  
3.305  
3.300  
3.161  
3.157  
3.140  
3.137  
3.120  
3.116  
2.907  
2.803  
2.789  
2.788  
2.762  
2.758  
2.747  
2.740  
2.723  
2.718  
2.702  
2.661  
2.656  
2.645  
2.640  
2.619  
2.614  
2.603  
2.599  
1.333  
1.326  
1.315  
1.308  
1.297  
1.290  
1.272  
1.255  
1.083  
1.065

| Parameter                | Value               |
|--------------------------|---------------------|
| 1 Origin                 | Bruker BioSpin GmbH |
| 2 Solvent                | CDCl3               |
| 3 Temperature            | 298.2               |
| 4 Number of Scans        | 2                   |
| 5 Spectrometer Frequency | 400.15              |
| 6 Nucleus                | <sup>1</sup> H      |

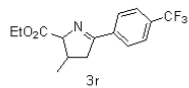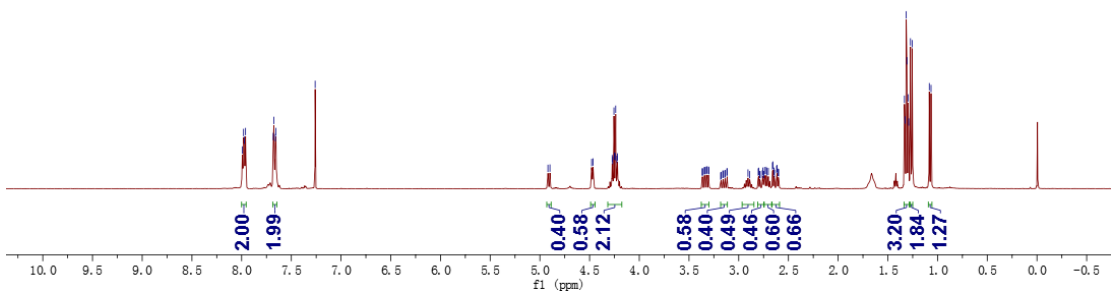

175.177  
174.428  
172.864  
170.883  
137.244  
137.151  
132.822  
127.939  
125.452  
125.416  
125.379  
125.343  
125.232  
122.824  
119.818  
81.509  
77.353  
77.036  
76.718  
61.185  
60.841  
43.659  
43.108  
36.317  
35.130  
19.882  
15.743  
14.345  
14.223

| Parameter                | Value               |
|--------------------------|---------------------|
| 1 Origin                 | Bruker BioSpin GmbH |
| 2 Solvent                | CDCl3               |
| 3 Temperature            | 298.1               |
| 4 Number of Scans        | 1024                |
| 5 Spectrometer Frequency | 100.61              |
| 6 Nucleus                | <sup>13</sup> C     |

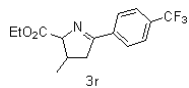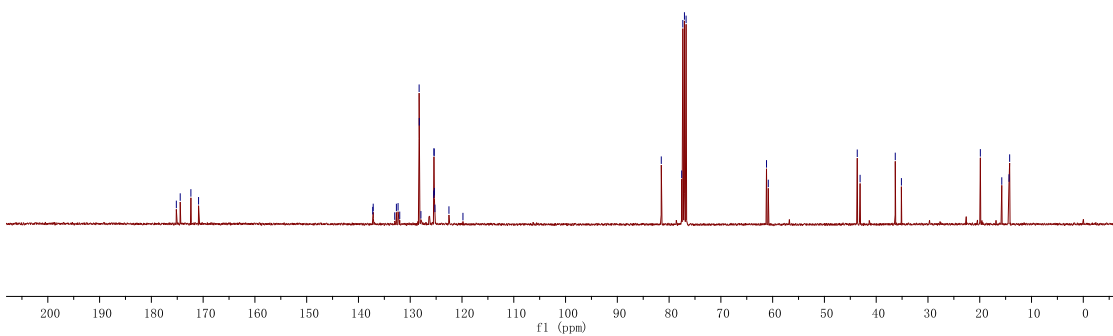

—62.877

| Parameter                | Value               |
|--------------------------|---------------------|
| 1 Origin                 | Bruker BioSpin GmbH |
| 2 Solvent                | CDCl3               |
| 3 Temperature            | 298.2               |
| 4 Number of Scans        | 2                   |
| 5 Spectrometer Frequency | 376.52              |
| 6 Nucleus                | 19F                 |

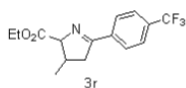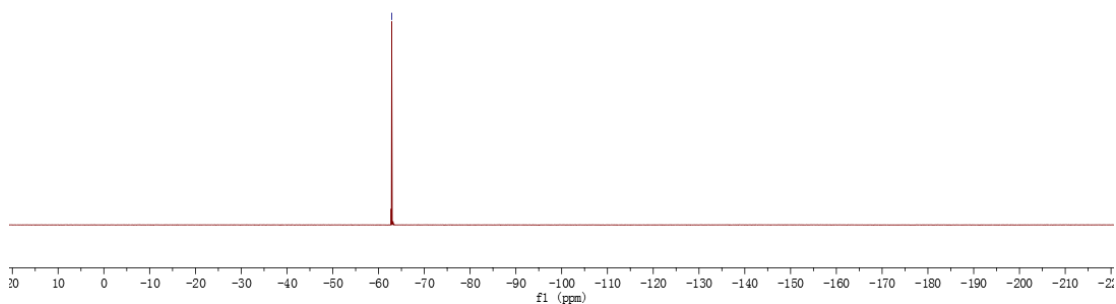

7.880  
7.867  
7.858  
7.855  
7.846  
7.833  
7.260  
7.099  
7.093  
7.077  
7.071  
7.056  
7.049

4.862  
4.841

4.250  
4.235  
4.224  
4.217  
4.207

3.069  
3.066  
2.862  
2.755  
2.751  
2.713  
2.710  
2.694  
2.611  
2.611  
1.310  
1.310  
1.298  
1.298  
1.280  
1.275  
1.246  
1.229  
1.058  
1.041

| Parameter                | Value               |
|--------------------------|---------------------|
| 1 Origin                 | Bruker BioSpin GmbH |
| 2 Solvent                | CDCl3               |
| 3 Temperature            | 298.1               |
| 4 Number of Scans        | 2                   |
| 5 Spectrometer Frequency | 400.15              |
| 6 Nucleus                | 1H                  |

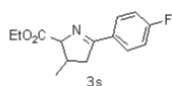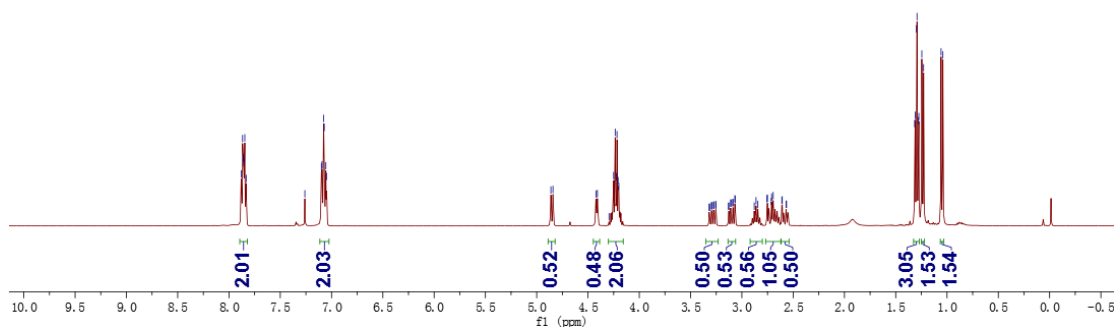

175.048  
174.313  
172.670  
171.203  
166.737  
165.721  
163.242  
163.222

130.438  
130.407  
130.340  
130.308  
130.120  
130.089  
130.035  
130.002  
115.589  
115.352

81.339  
77.377  
77.057  
76.739

61.062  
60.724

43.825  
43.064  
38.367  
35.150

19.919  
15.782  
14.362  
14.237

| Parameter                | Value               |
|--------------------------|---------------------|
| 1 Origin                 | Bruker BioSpin GmbH |
| 2 Solvent                | CDCl3               |
| 3 Temperature            | 298.1               |
| 4 Number of Scans        | 1024                |
| 5 Spectrometer Frequency | 100.61              |
| 6 Nucleus                | 13C                 |

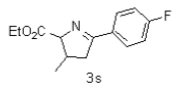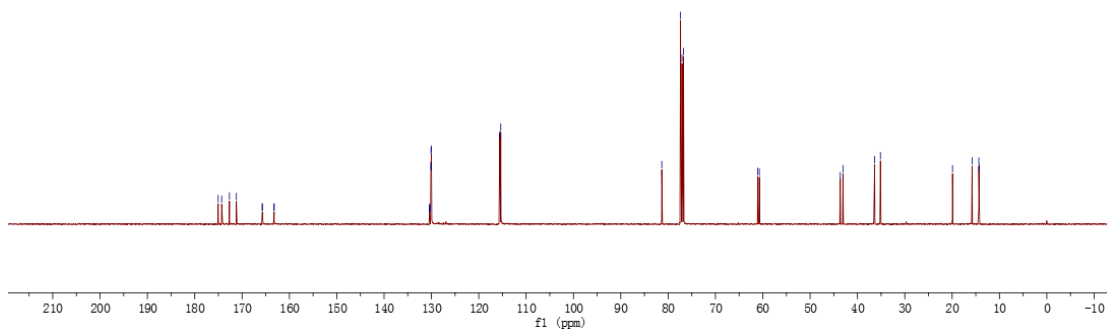

109.196  
109.214

| Parameter                | Value               |
|--------------------------|---------------------|
| 1 Origin                 | Bruker BioSpin GmbH |
| 2 Solvent                | CDCl3               |
| 3 Temperature            | 298.2               |
| 4 Number of Scans        | 2                   |
| 5 Spectrometer Frequency | 376.52              |
| 6 Nucleus                | 19F                 |

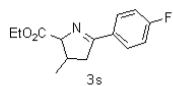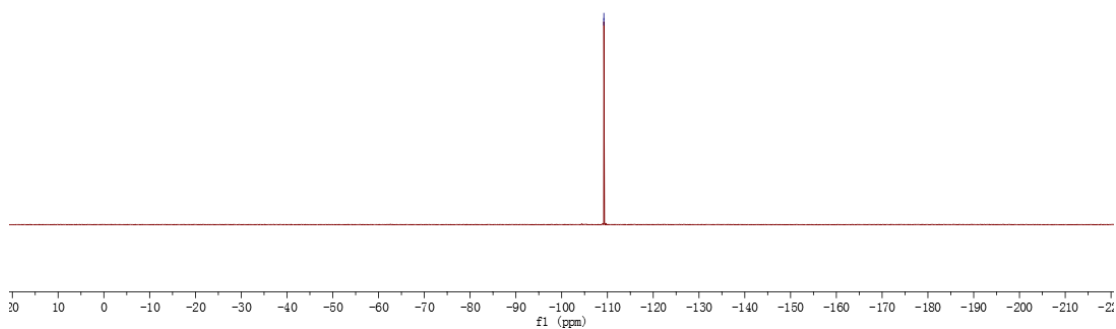

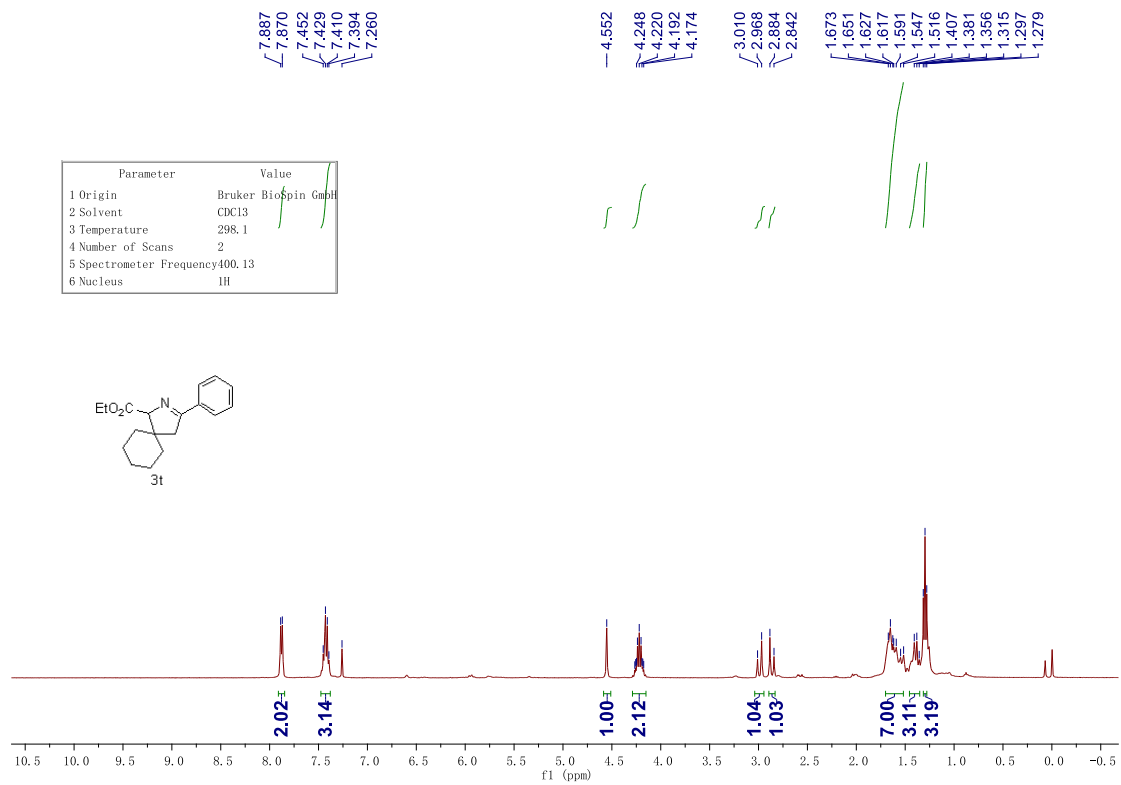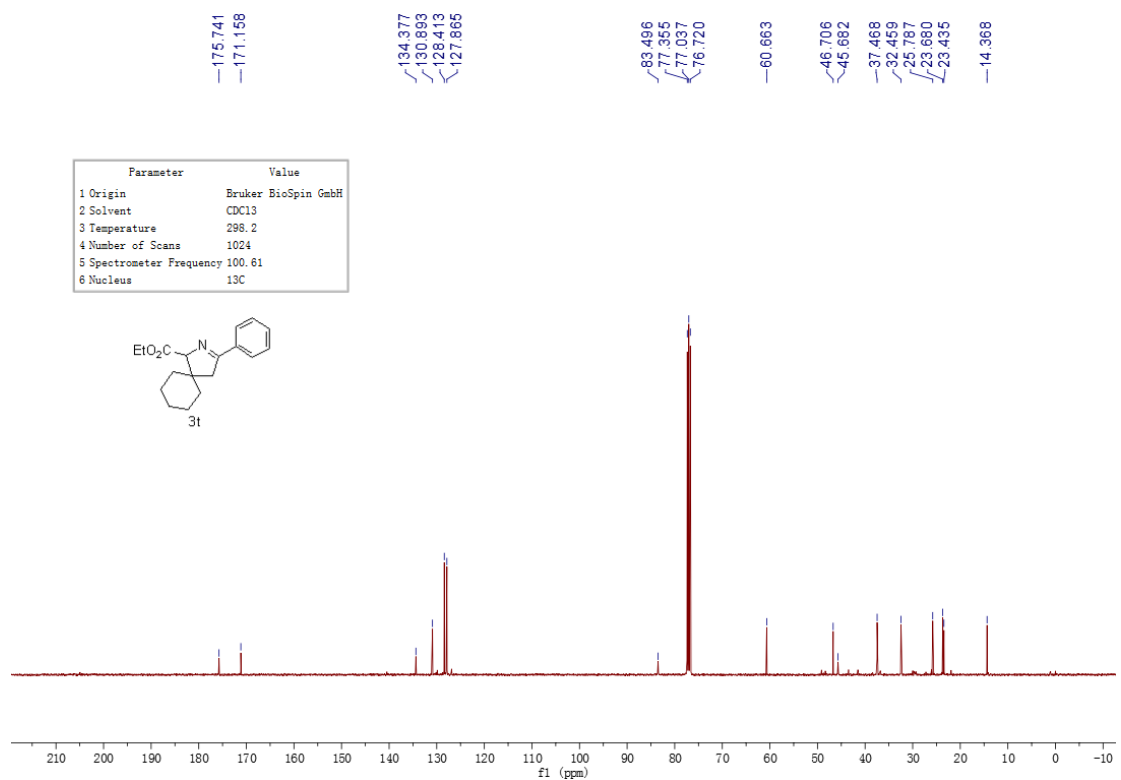

7.979  
7.979  
7.963  
7.959  
7.928  
7.911  
7.908  
7.502  
7.485  
7.478  
7.459  
7.441  
7.436  
7.326  
7.308  
7.260  
7.244  
7.228  
7.221  
7.206  
7.202  
7.186  
5.239  
5.217  
4.950  
4.935  
4.935  
4.260  
4.255  
4.243  
4.238  
4.225  
4.053  
4.032  
4.014  
4.014  
3.993  
3.892  
3.868  
3.864  
3.837  
3.820  
3.810  
3.793  
3.719  
3.701  
3.693  
3.684  
3.675  
3.657  
3.444  
3.430  
3.425  
3.421  
3.207  
3.204  
3.191  
3.188  
3.164  
3.161  
1.296  
1.278  
0.867  
0.849  
0.832

| Parameter                | Value               |
|--------------------------|---------------------|
| 1 Origin                 | Bruker BioSpin GmbH |
| 2 Solvent                | CDCl3               |
| 3 Temperature            | 298.2               |
| 4 Number of Scans        | 4                   |
| 5 Spectrometer Frequency | 400.13              |
| 6 Nucleus                | 1H                  |

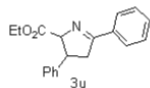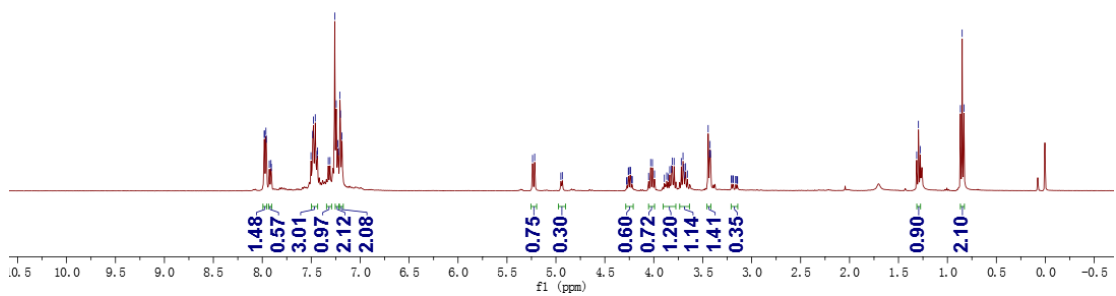

176.325  
175.013  
172.214  
170.405  
143.316  
139.659  
133.792  
133.638  
131.205  
131.169  
128.890  
128.560  
128.531  
128.326  
128.127  
127.783  
127.084  
126.898  
126.932  
82.678  
79.242  
77.448  
77.024  
76.601  
61.321  
60.515  
46.620  
46.428  
44.708  
42.086  
14.215  
13.701

| Parameter                | Value               |
|--------------------------|---------------------|
| 1 Origin                 | Bruker BioSpin GmbH |
| 2 Solvent                | CDCl3               |
| 3 Temperature            | 298.0               |
| 4 Number of Scans        | 2048                |
| 5 Spectrometer Frequency | 75.47               |
| 6 Nucleus                | 13C                 |

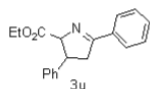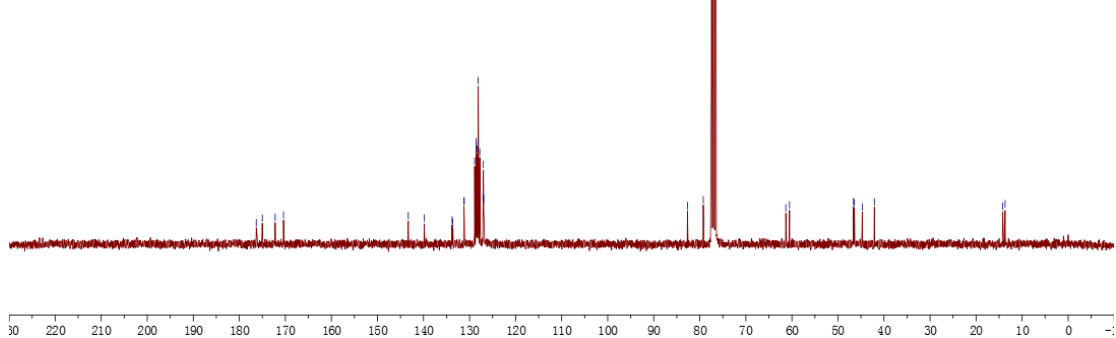

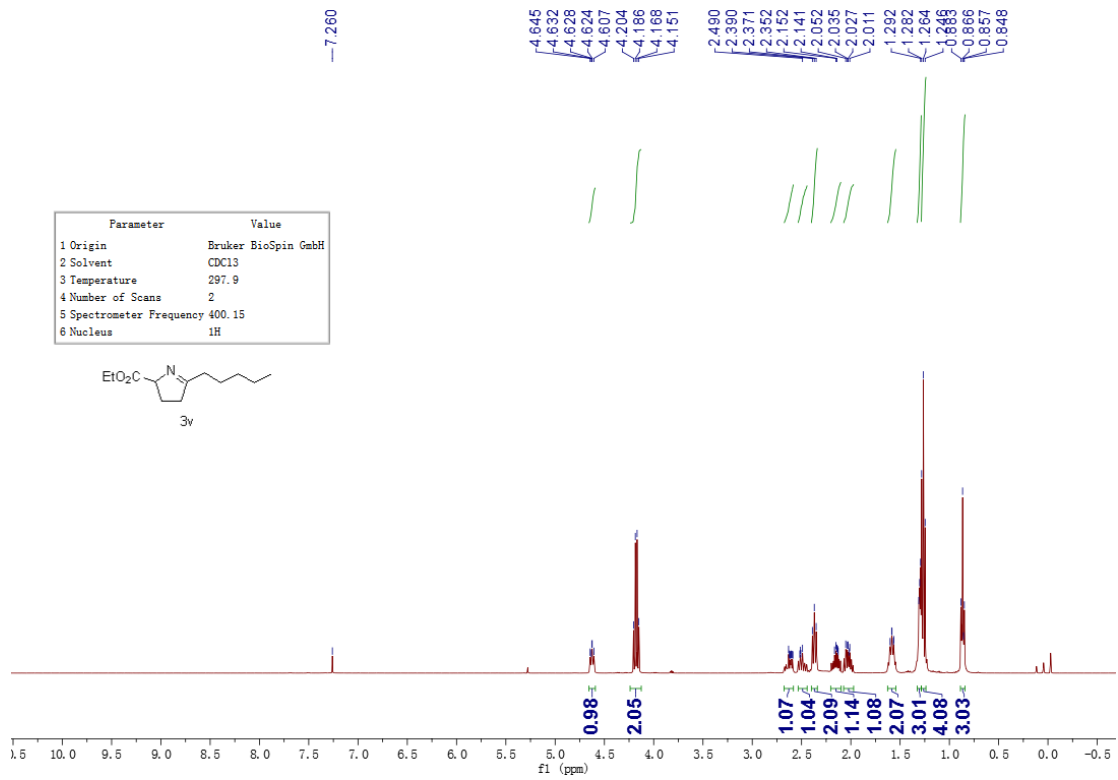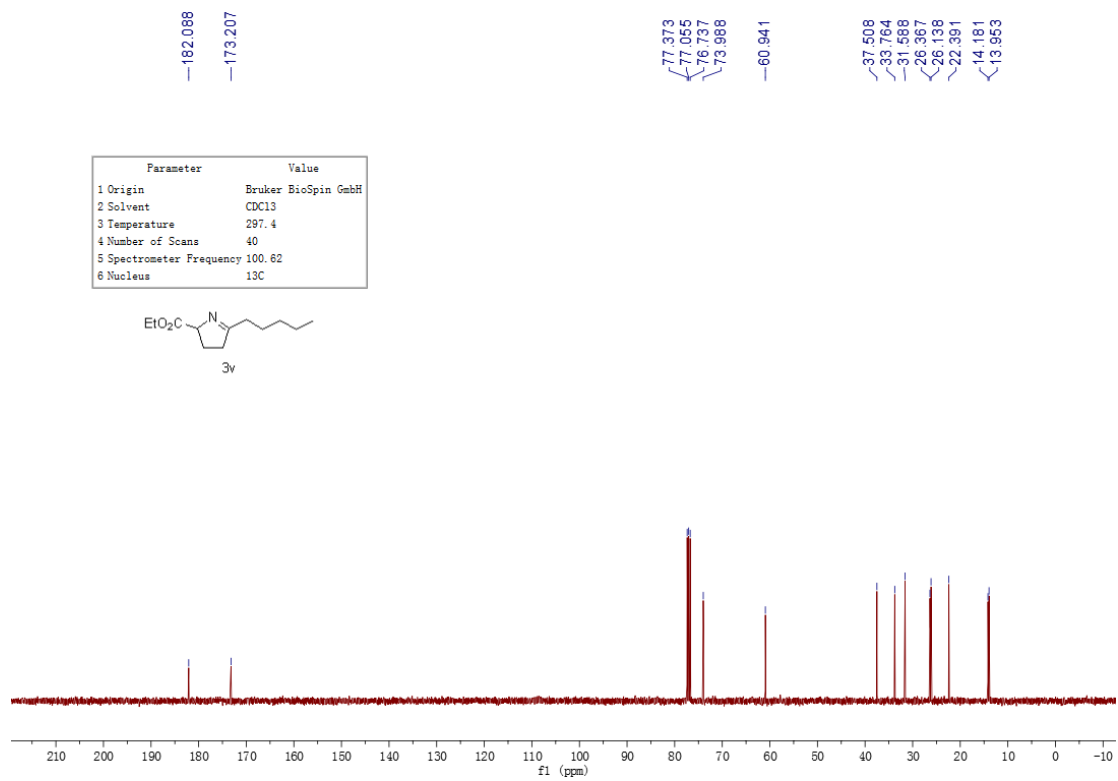

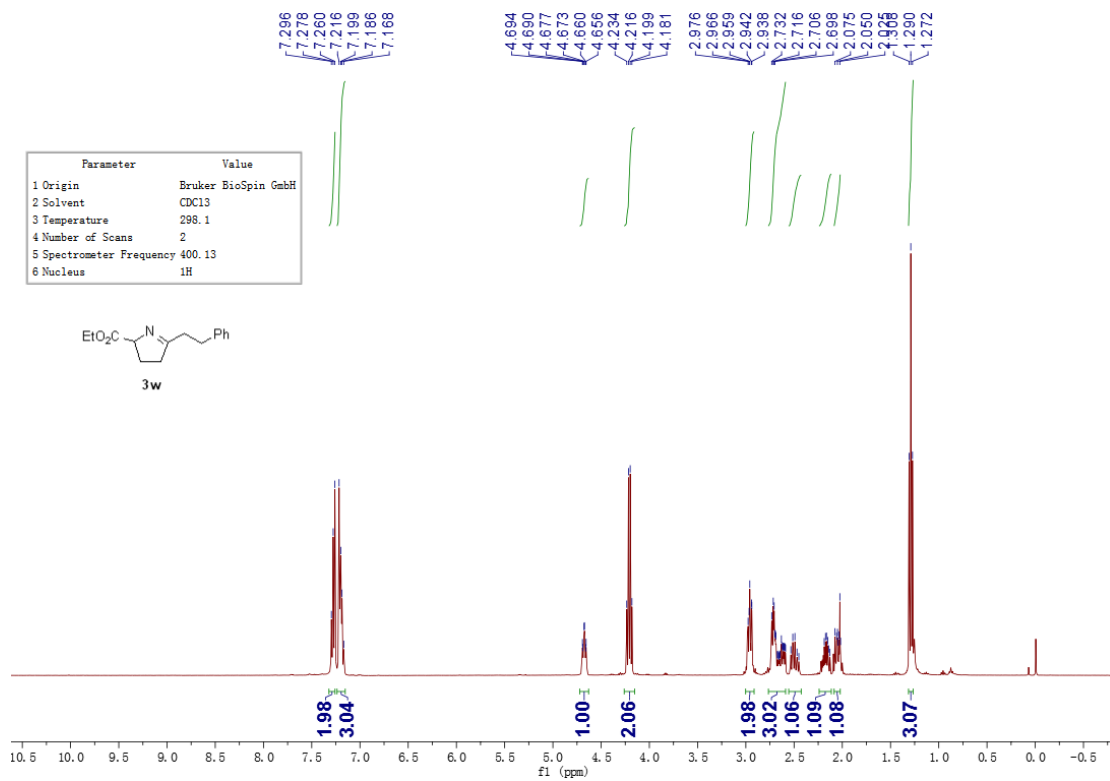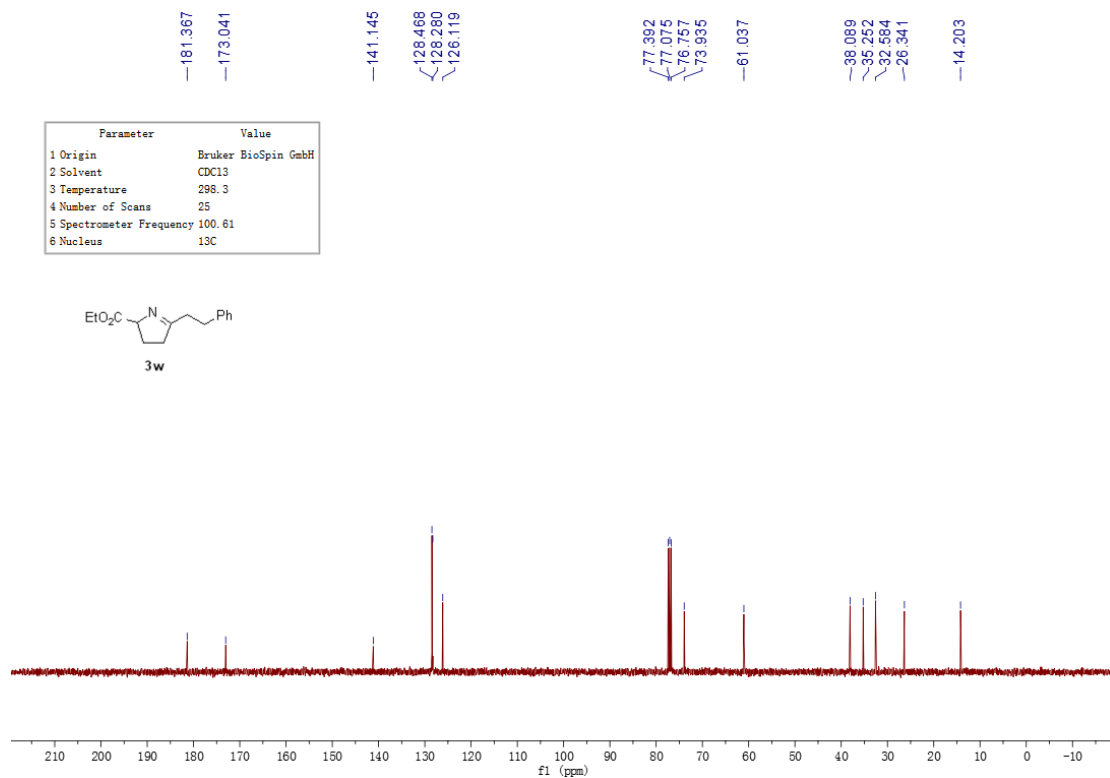



| Parameter                | Value               |
|--------------------------|---------------------|
| 1 Origin                 | Bruker BioSpin GmbH |
| 2 Solvent                | CDCl3               |
| 3 Temperature            | 298.2               |
| 4 Number of Scans        | 2                   |
| 5 Spectrometer Frequency | 400.13              |
| 6 Nucleus                | 1H                  |

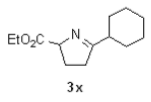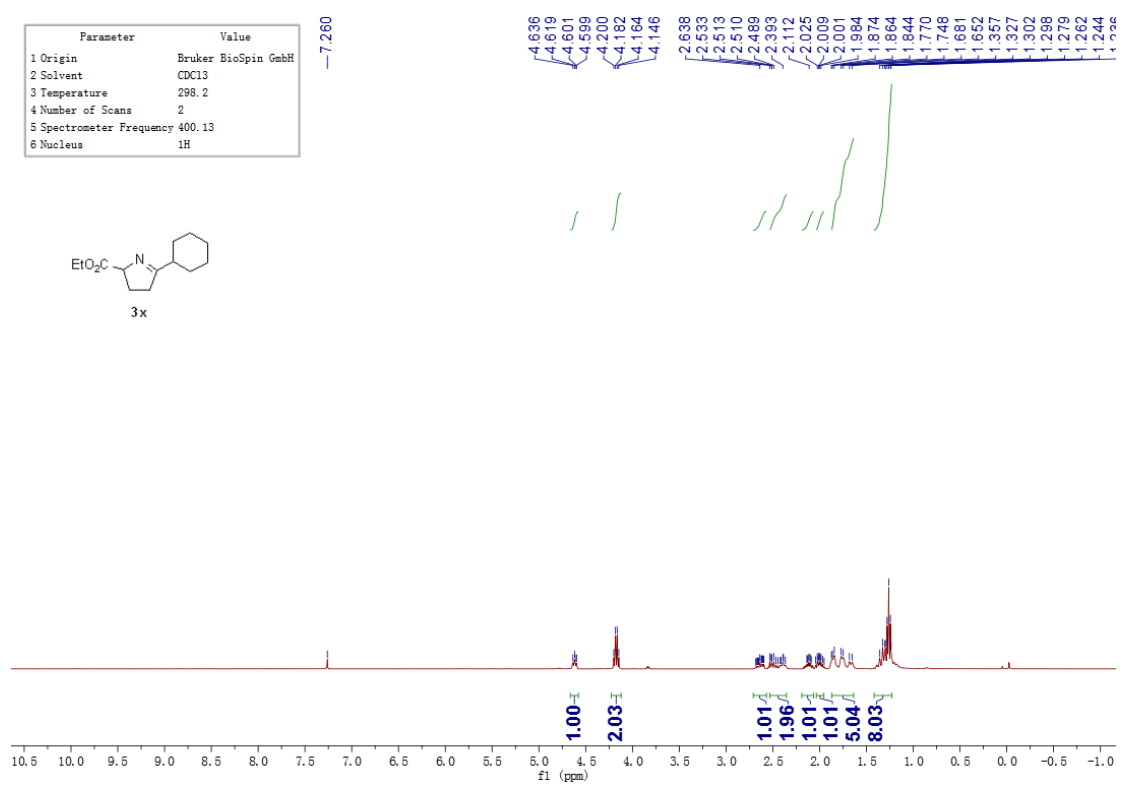

185.591  
173.211

77.370  
77.052  
76.755  
73.701  
60.882  
42.454  
35.287  
30.399  
30.351  
26.146  
23.979  
23.881  
14.156

| Parameter                | Value               |
|--------------------------|---------------------|
| 1 Origin                 | Bruker BioSpin GmbH |
| 2 Solvent                | CDCl3               |
| 3 Temperature            | 299.7               |
| 4 Number of Scans        | 60                  |
| 5 Spectrometer Frequency | 100.62              |
| 6 Nucleus                | 13C                 |

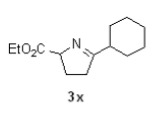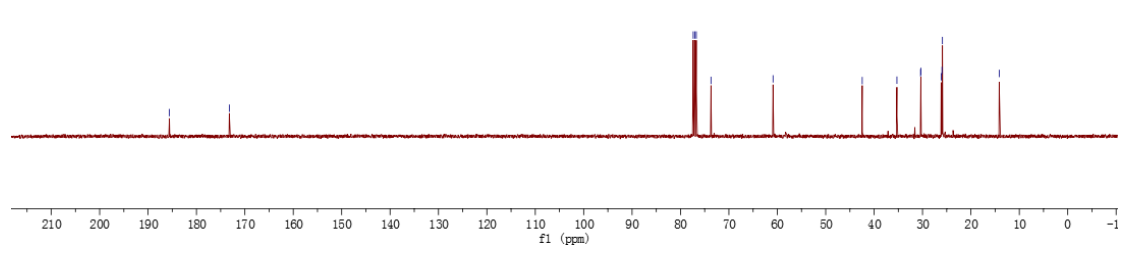

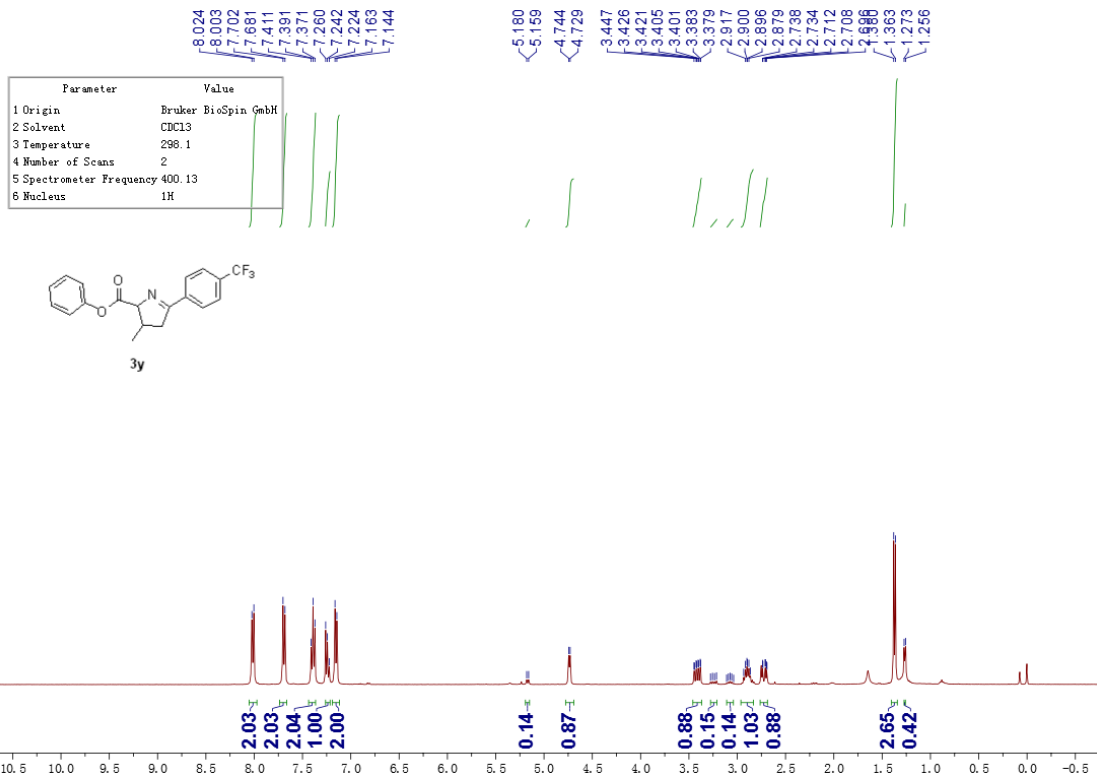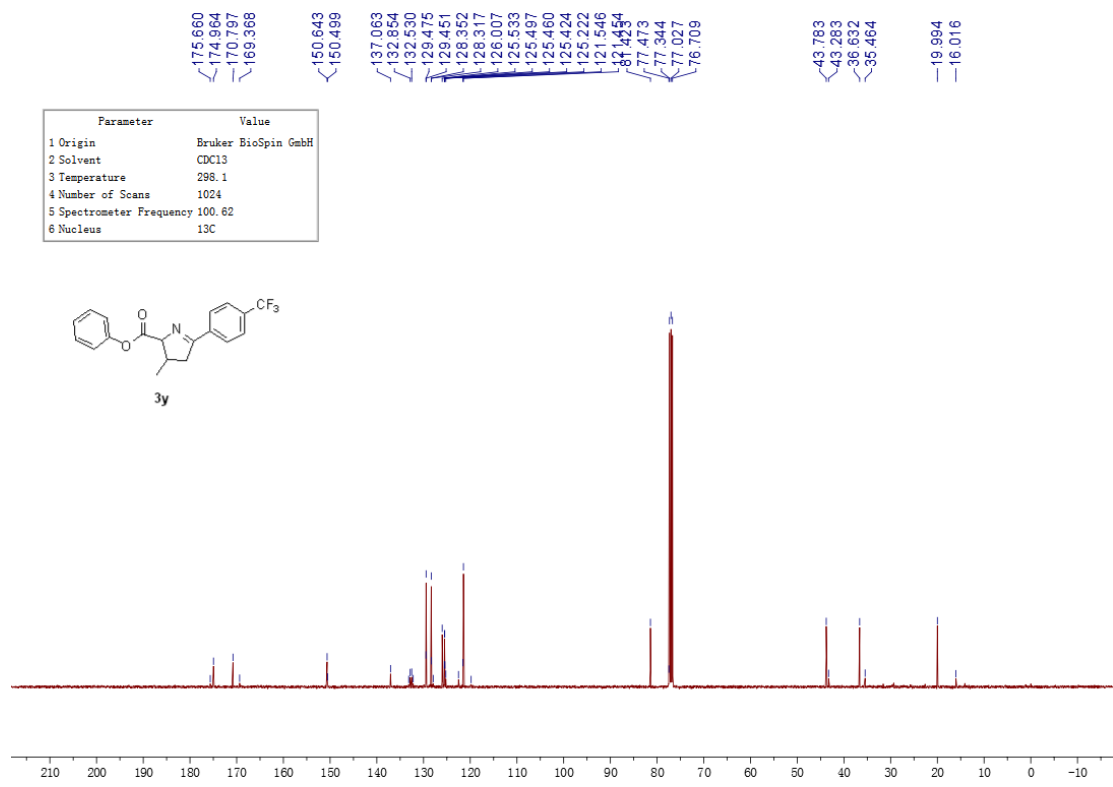

| Parameter                | Value               |
|--------------------------|---------------------|
| 1 Origin                 | Bruker BioSpin GmbH |
| 2 Solvent                | CDCl3               |
| 3 Temperature            | 298.2               |
| 4 Number of Scans        | 2                   |
| 5 Spectrometer Frequency | 376.52              |
| 6 Nucleus                | 19F                 |

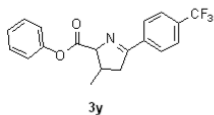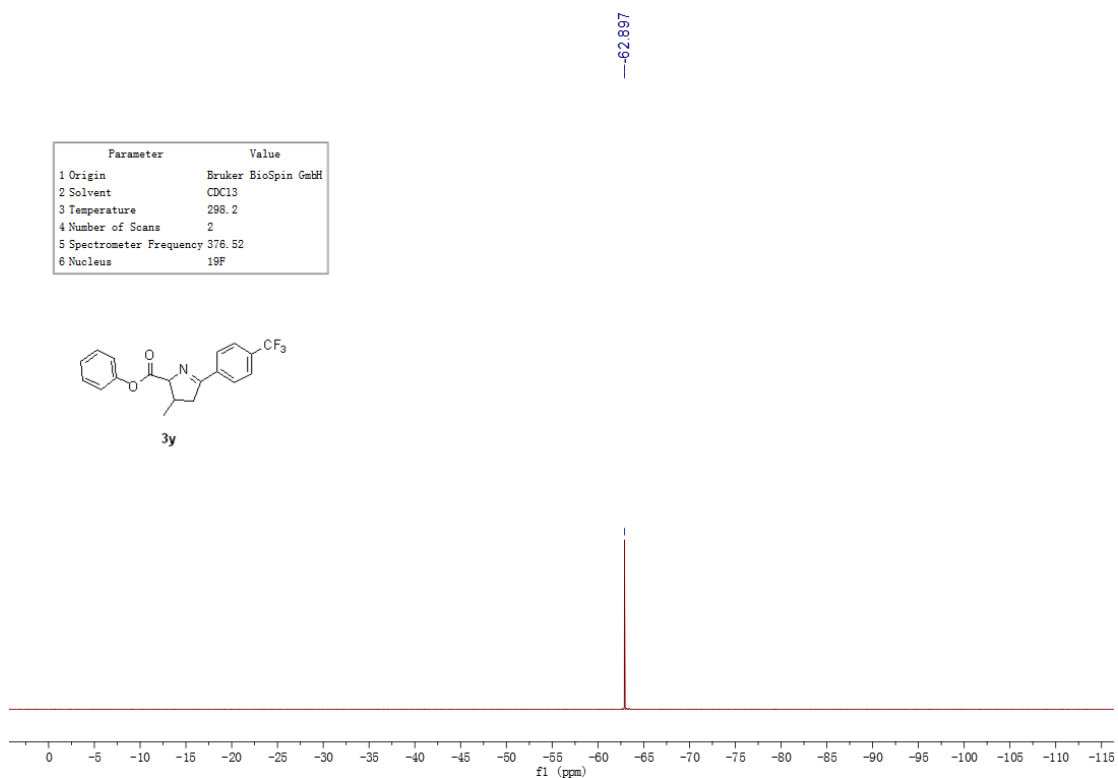

8.038  
8.018  
7.713  
7.693  
7.614  
7.593  
7.582  
7.460  
7.441  
7.423  
7.384  
7.370  
7.353  
7.333  
7.260  
7.244  
7.223

5.207  
5.187  
4.770  
4.756

3.464  
3.443  
3.422  
3.400  
3.230  
3.097  
2.957  
2.941  
2.924  
2.804  
2.888  
2.862  
2.769  
2.753  
2.726  
2.318  
1.382  
1.294  
1.277

| Parameter                | Value               |
|--------------------------|---------------------|
| 1 Origin                 | Bruker BioSpin GmbH |
| 2 Solvent                | CDCl3               |
| 3 Temperature            | 298.1               |
| 4 Number of Scans        | 2                   |
| 5 Spectrometer Frequency | 400.13              |
| 6 Nucleus                | 1H                  |

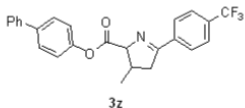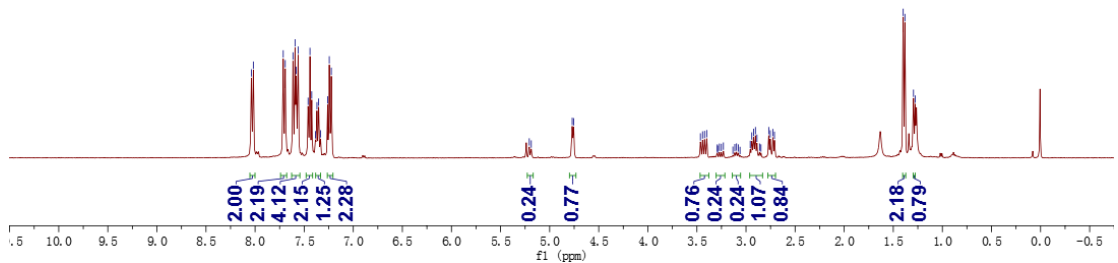

175.731  
 175.062  
 170.871  
 169.460  
 150.056  
 149.898  
 140.308  
 139.182  
 128.820  
 128.378  
 128.343  
 128.218  
 128.183  
 127.411  
 127.130  
 125.565  
 125.519  
 125.482  
 125.445  
 121.813  
 87.4394  
 87.4384  
 77.484  
 77.360  
 77.043  
 76.725  
 43.807  
 43.314  
 38.663  
 35.471  
 19.990  
 16.066

| Parameter                | Value               |
|--------------------------|---------------------|
| 1 Origin                 | Bruker BioSpin GmbH |
| 2 Solvent                | CDCl3               |
| 3 Temperature            | 298.2               |
| 4 Number of Scans        | 1024                |
| 5 Spectrometer Frequency | 100.62              |
| 6 Nucleus                | 13C                 |

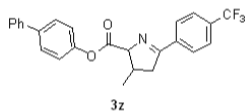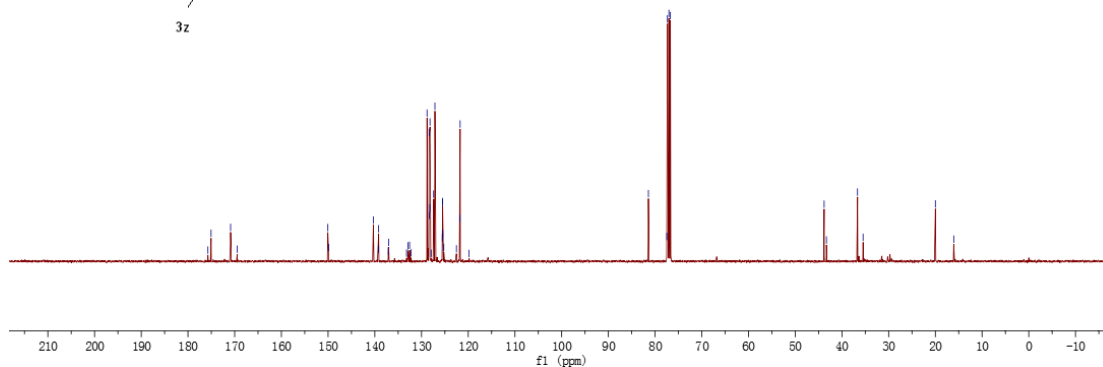

| Parameter                | Value               |
|--------------------------|---------------------|
| 1 Origin                 | Bruker BioSpin GmbH |
| 2 Solvent                | CDCl3               |
| 3 Temperature            | 298.2               |
| 4 Number of Scans        | 2                   |
| 5 Spectrometer Frequency | 376.52              |
| 6 Nucleus                | 19F                 |

-62.307  
 -62.909

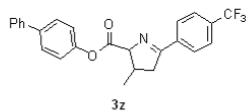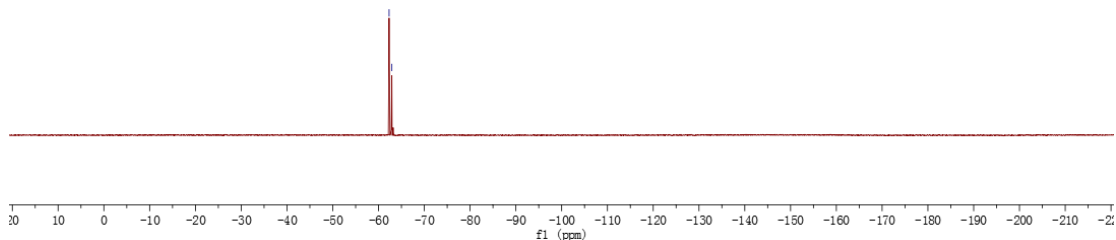

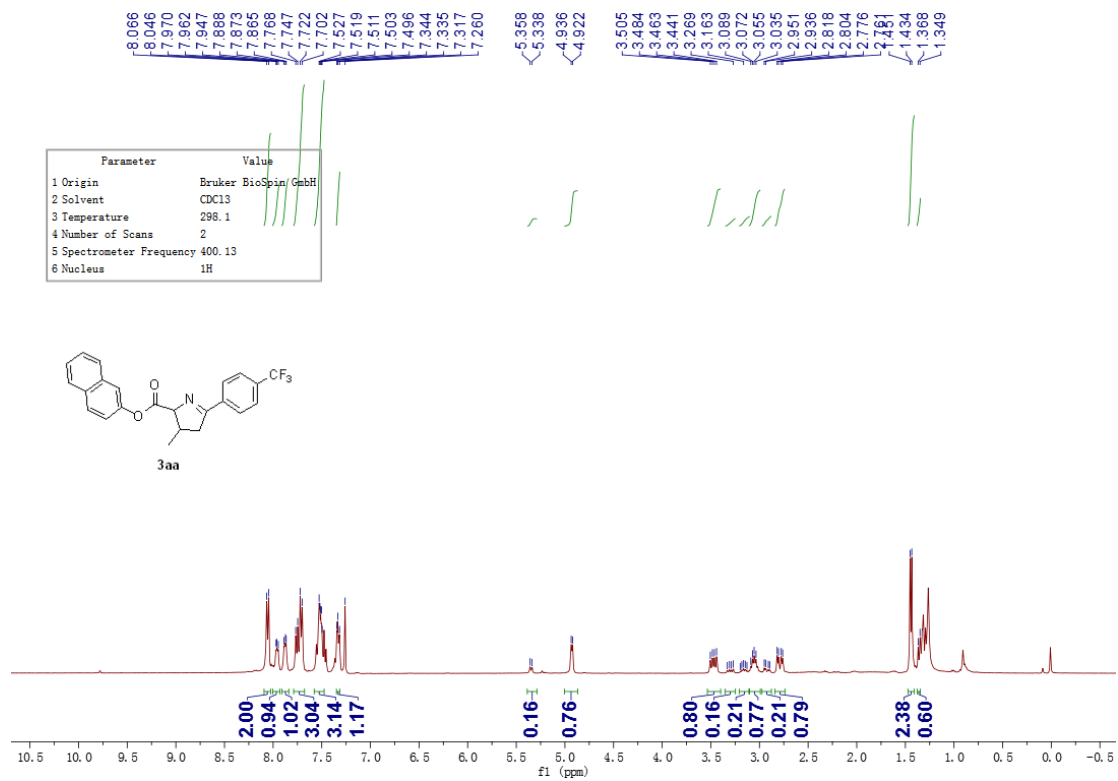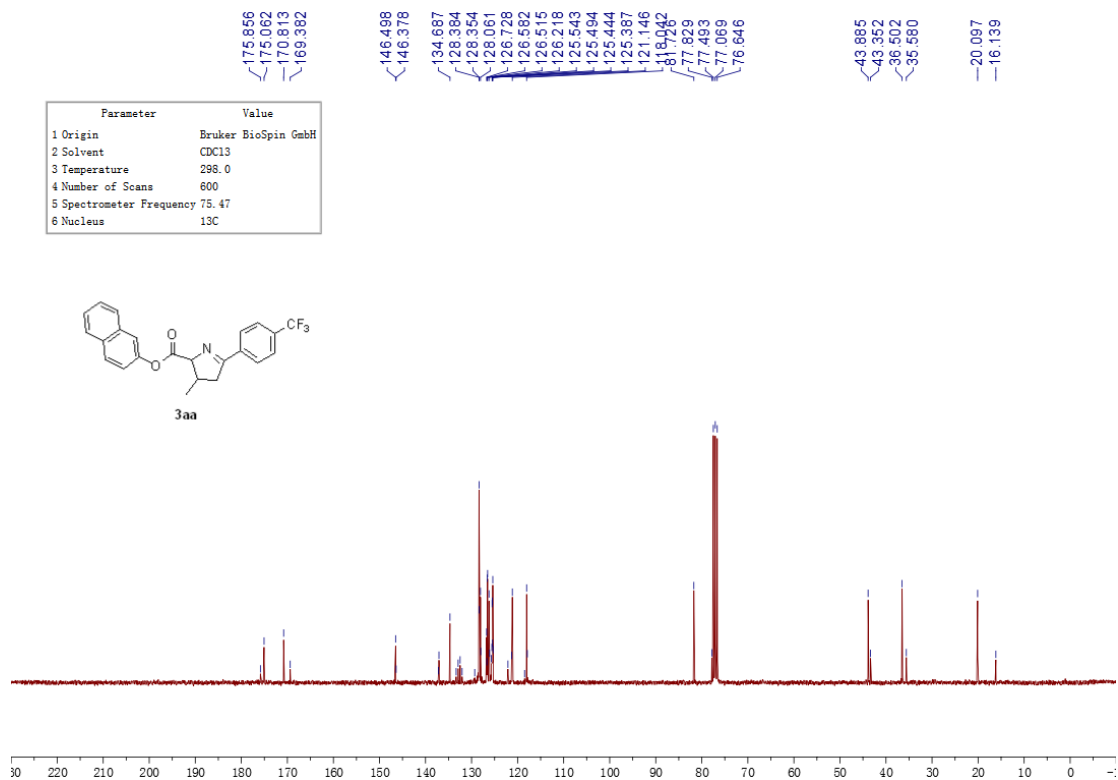

| Parameter                | Value               |
|--------------------------|---------------------|
| 1 Origin                 | Bruker BioSpin GmbH |
| 2 Solvent                | CDCl3               |
| 3 Temperature            | 298.2               |
| 4 Number of Scans        | 2                   |
| 5 Spectrometer Frequency | 376.52              |
| 6 Nucleus                | 19F                 |

62.886  
63.151

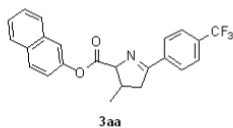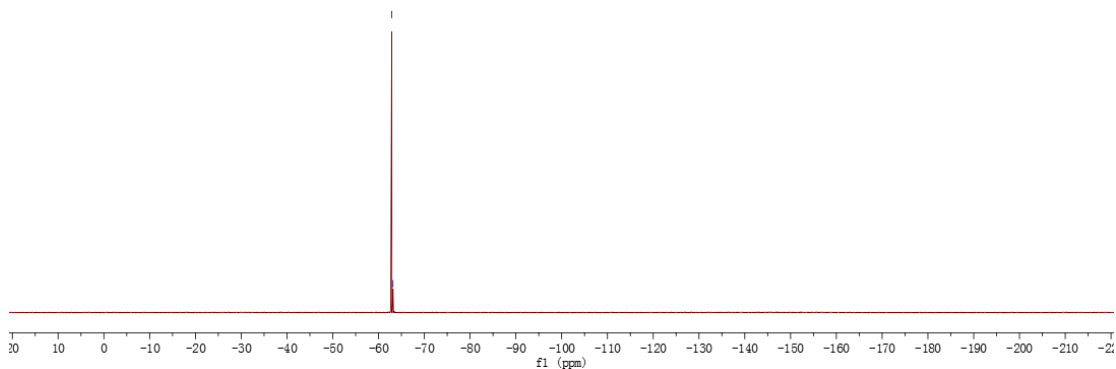

7.915  
7.899  
7.885  
7.869  
7.857  
7.842  
7.424  
7.405  
7.352  
7.349  
7.333  
7.315  
7.243  
7.236  
7.231  
7.214  
5.176  
4.774  
4.759  
3.423  
3.419  
3.401  
3.397  
3.381  
3.377  
3.359  
3.354  
2.902  
2.886  
2.880  
2.864  
2.859  
2.848  
2.848  
2.762  
2.758  
2.746  
2.742  
2.726  
2.720  
2.716  
2.704  
2.700  
1.814  
1.797  
1.780  
1.763  
1.746  
1.681  
1.663  
1.647  
1.630  
1.612  
1.605  
1.509  
1.493  
1.488  
1.475  
1.471  
1.459  
1.455  
1.013  
1.009  
0.996  
0.979

| Parameter                | Value               |
|--------------------------|---------------------|
| 1 Origin                 | Bruker BioSpin GmbH |
| 2 Solvent                | CDCl3               |
| 3 Temperature            | 298.2               |
| 4 Number of Scans        | 2                   |
| 5 Spectrometer Frequency | 400.15              |
| 6 Nucleus                | 1H                  |

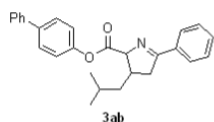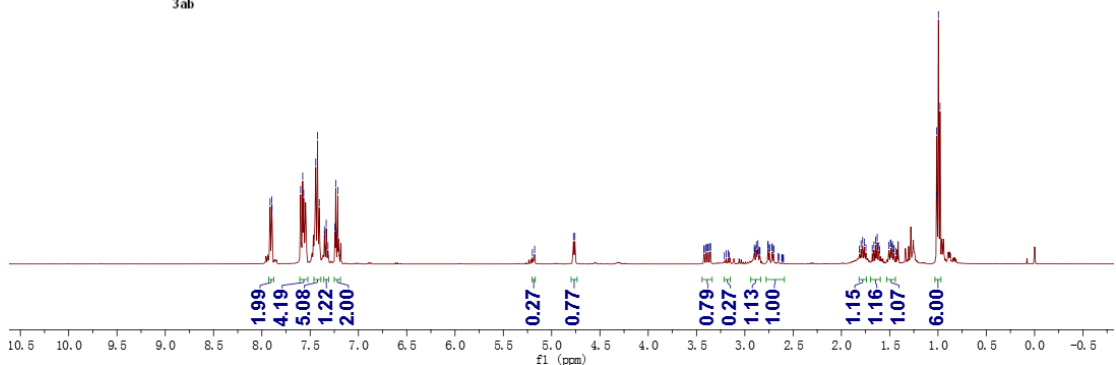

177.798  
176.247  
171.463  
169.758  
150.153  
149.956  
140.370  
139.068  
133.848  
131.171  
131.146  
128.803  
128.519  
128.178  
128.160  
128.073  
128.045  
128.009  
127.360  
127.132  
121.826  
121.780  
80.128  
77.381  
77.064  
76.980  
76.746  
44.497  
42.248  
40.719  
39.791  
39.615  
27.148  
26.721  
23.545  
22.907  
21.931

| Parameter                | Value               |
|--------------------------|---------------------|
| 1 Origin                 | Bruker BioSpin GmbH |
| 2 Solvent                | CDCl3               |
| 3 Temperature            | 298.2               |
| 4 Number of Scans        | 1024                |
| 5 Spectrometer Frequency | 100.62              |
| 6 Nucleus                | 13C                 |

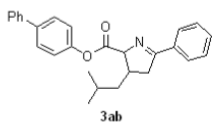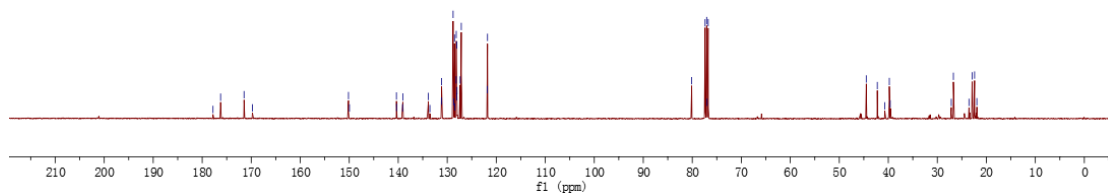

7.931  
7.913  
7.474  
7.456  
7.451  
7.432  
7.415  
7.410  
7.260  
7.253  
7.231  
7.226  
6.999  
6.988  
6.967  
5.198  
5.178  
4.810  
4.796  
3.402  
3.380  
3.360  
3.337  
2.962  
2.840  
2.825  
2.809  
2.803  
2.788  
2.761  
2.746  
1.776  
1.759  
1.662  
1.645  
1.625  
1.611  
1.508  
1.491  
1.486  
1.475  
1.458  
1.385  
1.327  
1.318  
1.011  
0.993  
0.975

| Parameter                | Value               |
|--------------------------|---------------------|
| 1 Origin                 | Bruker BioSpin GmbH |
| 2 Solvent                | CDCl3               |
| 3 Temperature            | 298.2               |
| 4 Number of Scans        | 2                   |
| 5 Spectrometer Frequency | 400.13              |
| 6 Nucleus                | 1H                  |

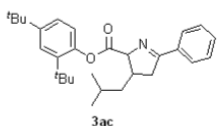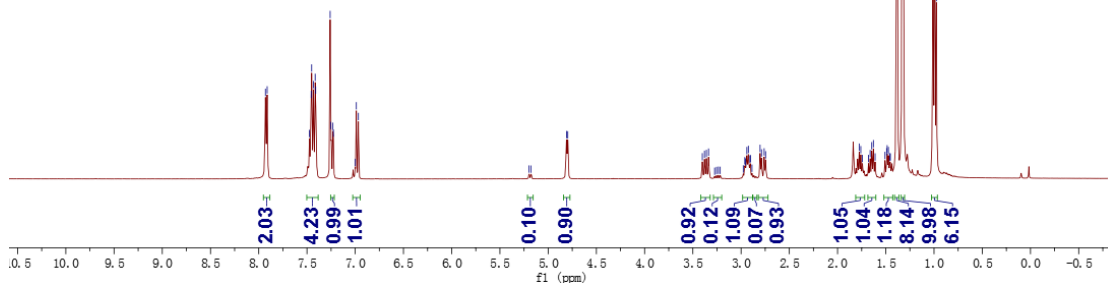

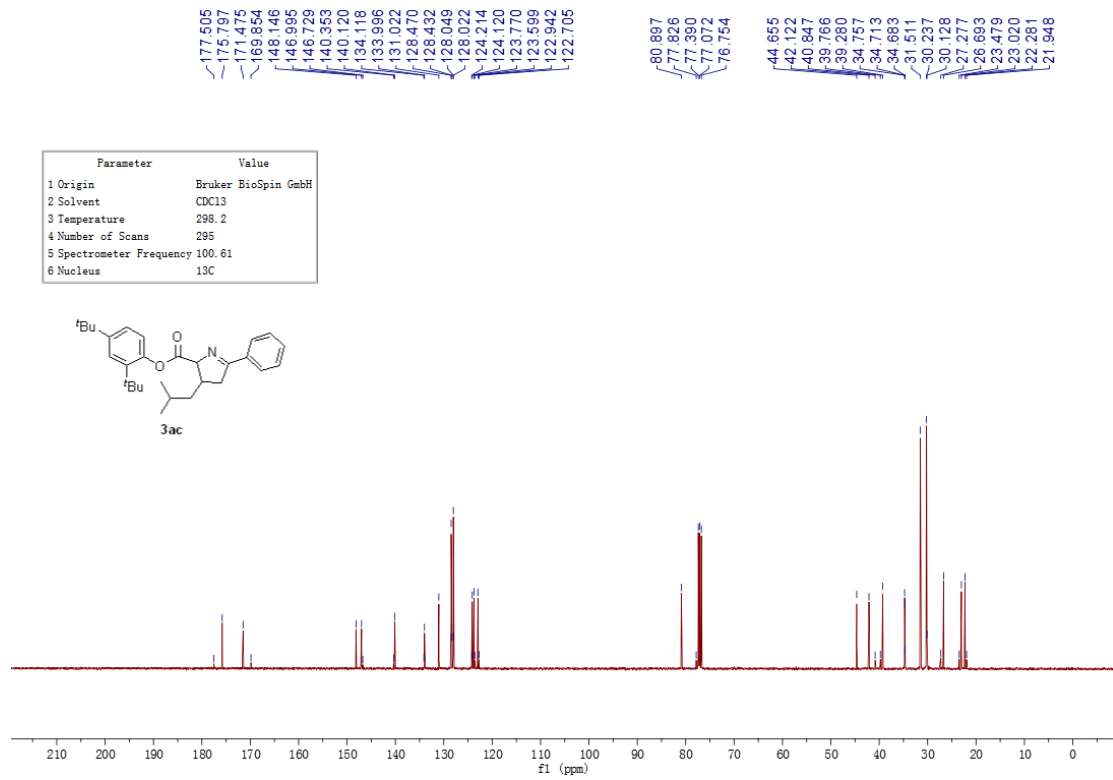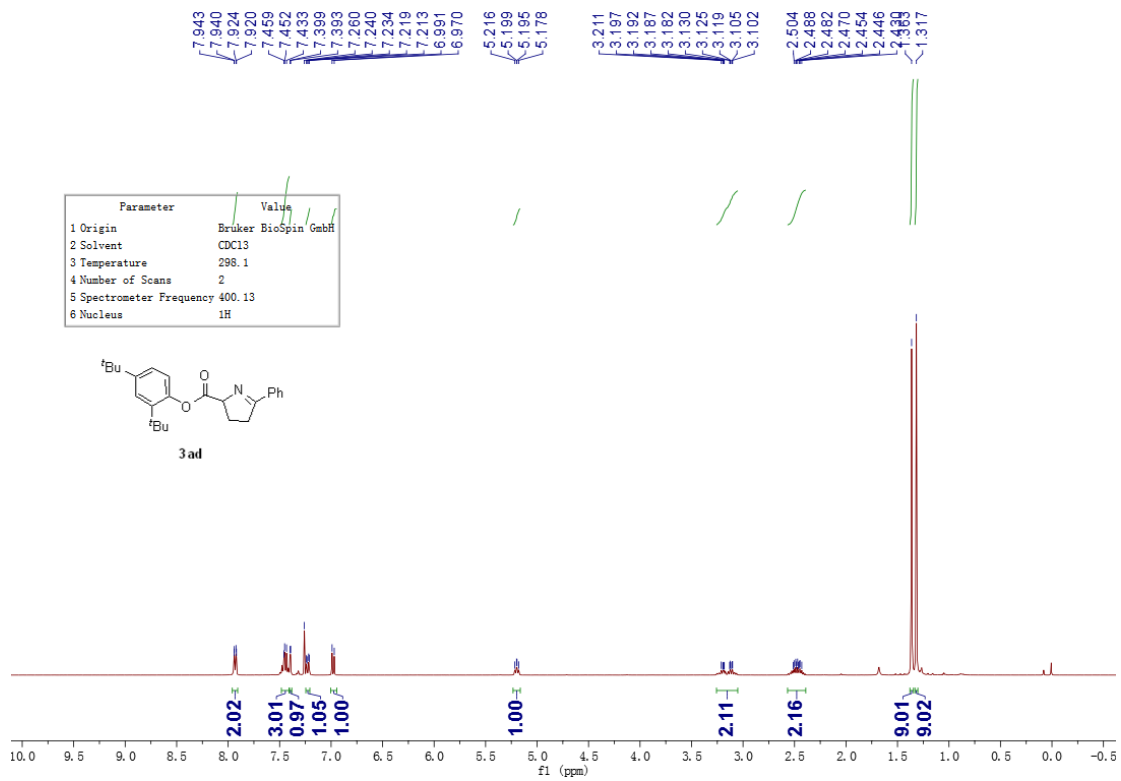



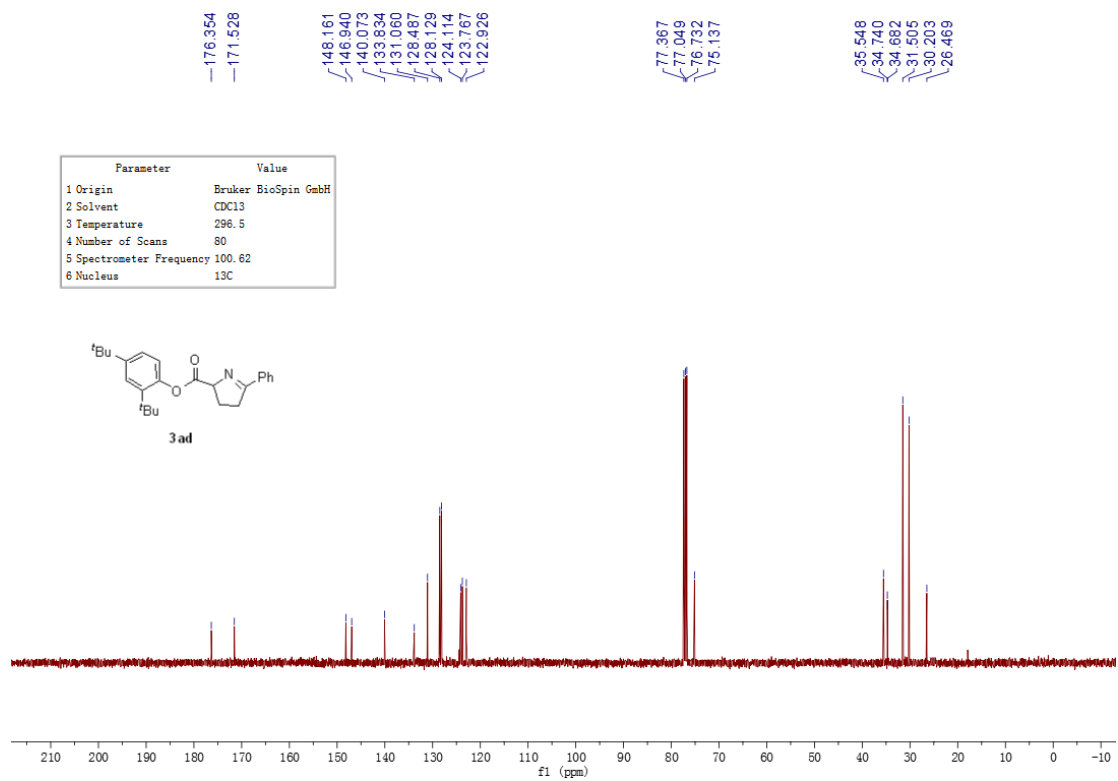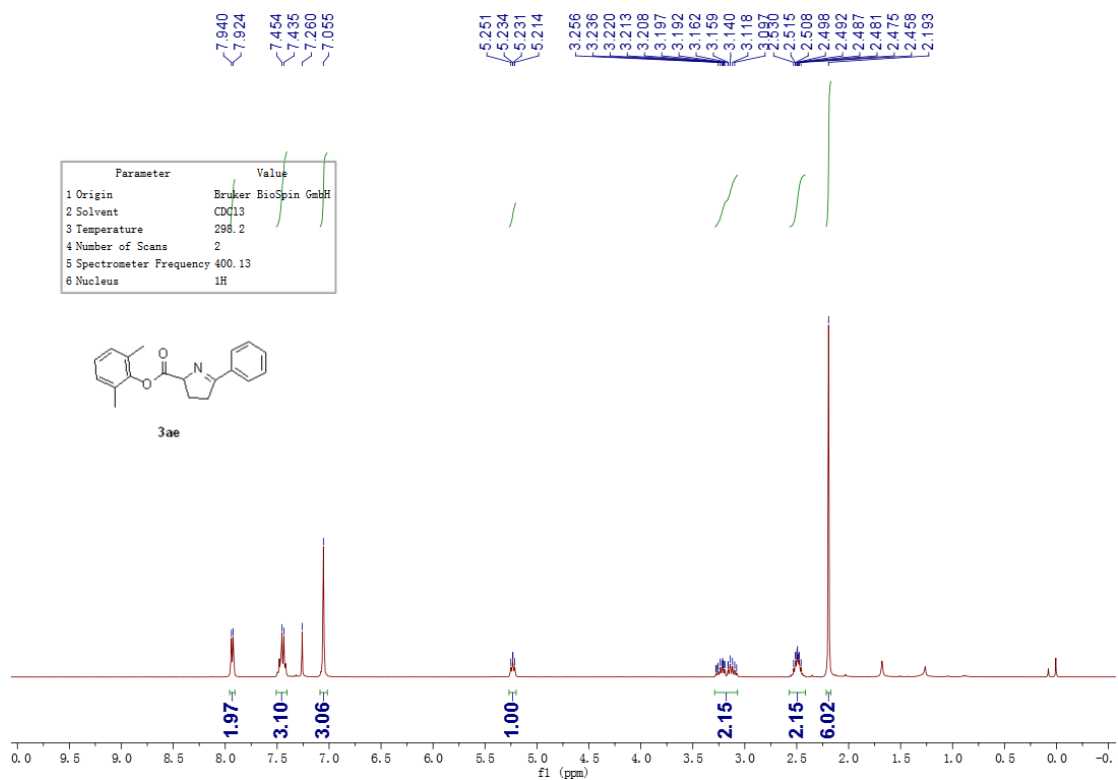

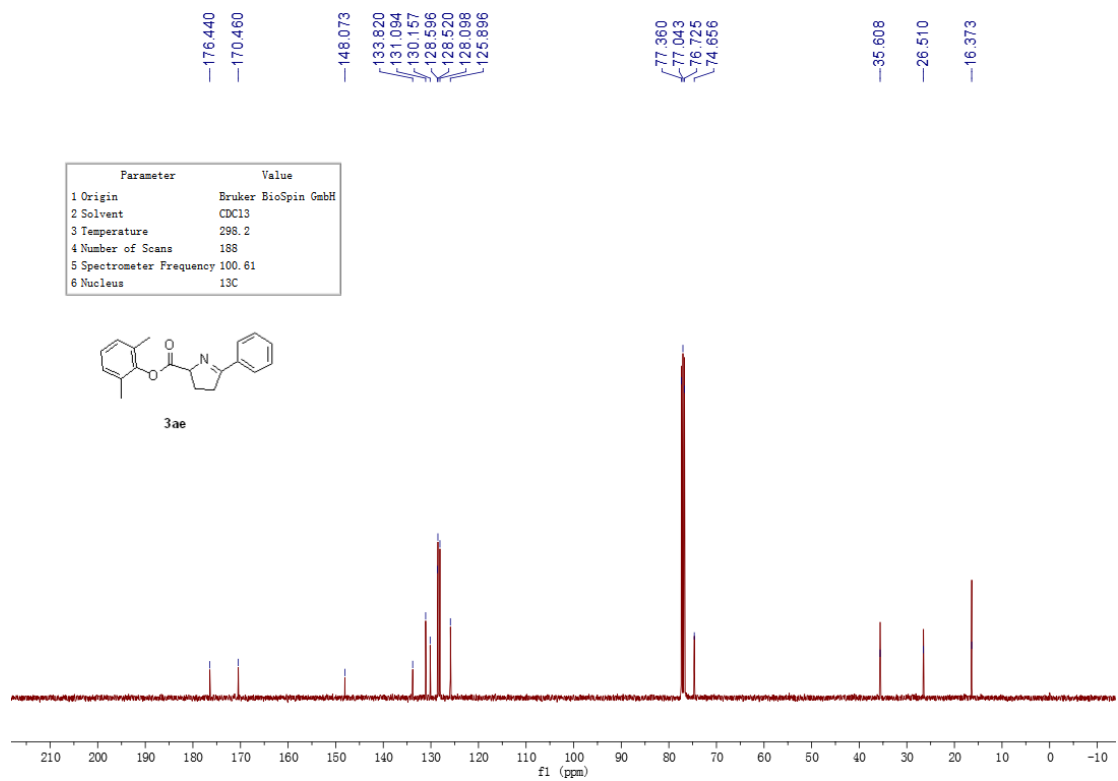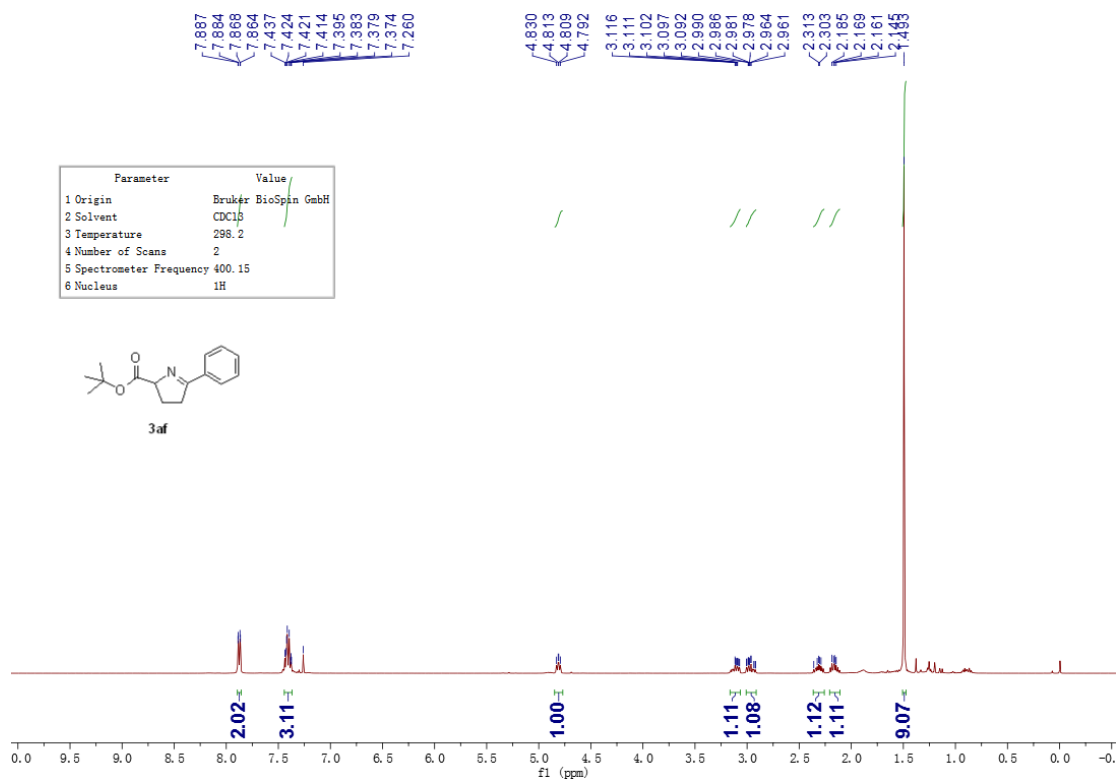

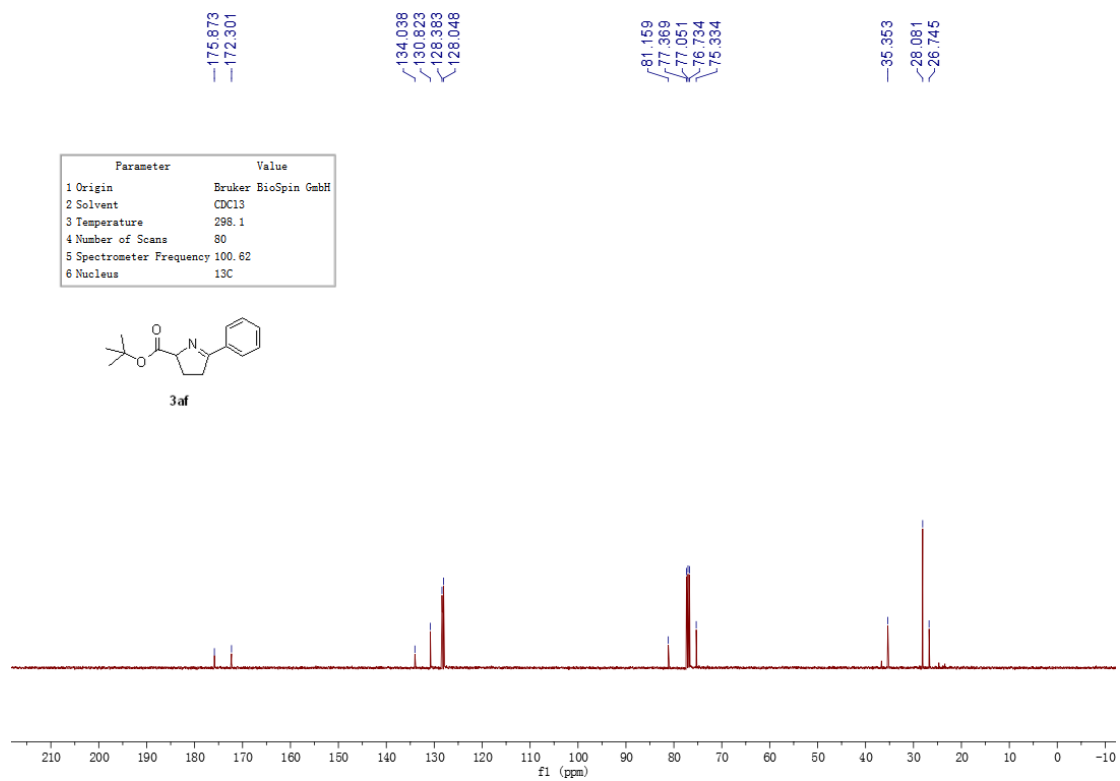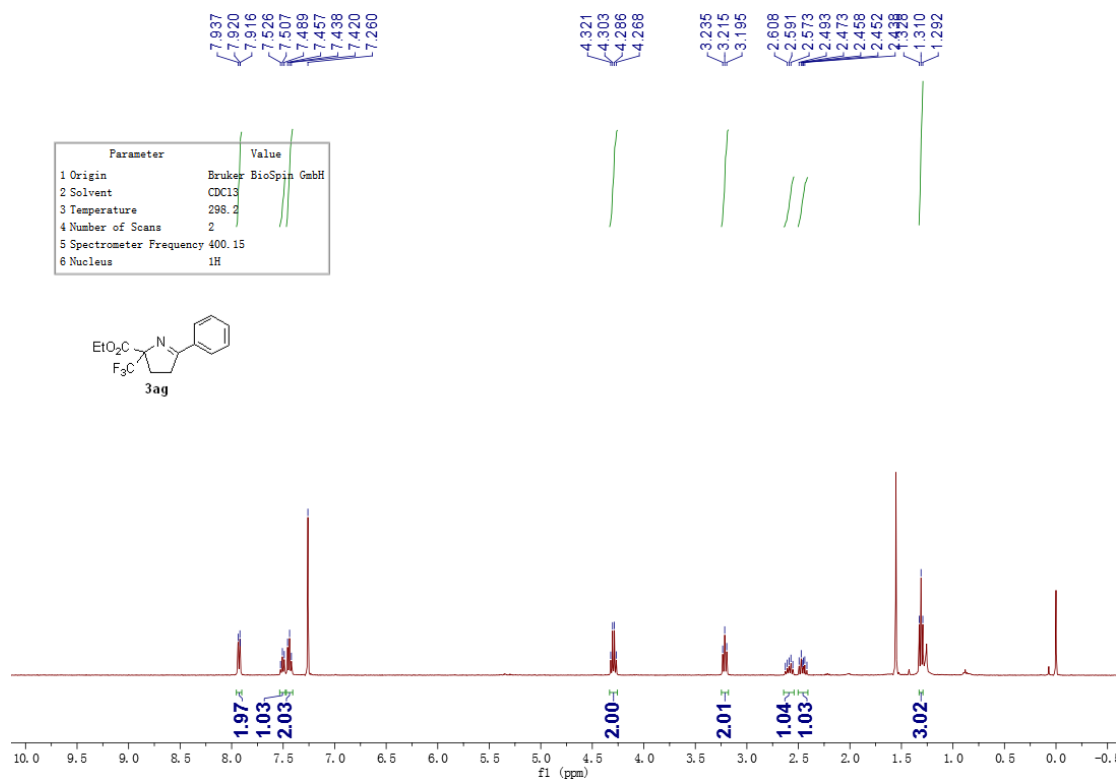

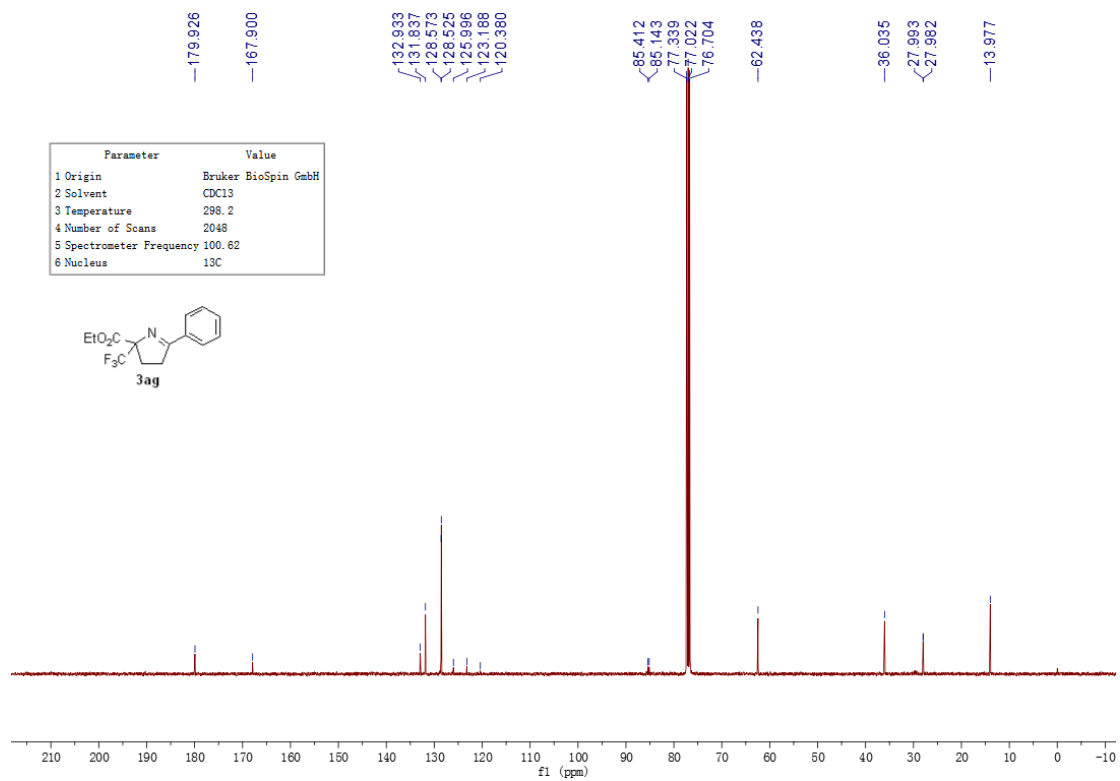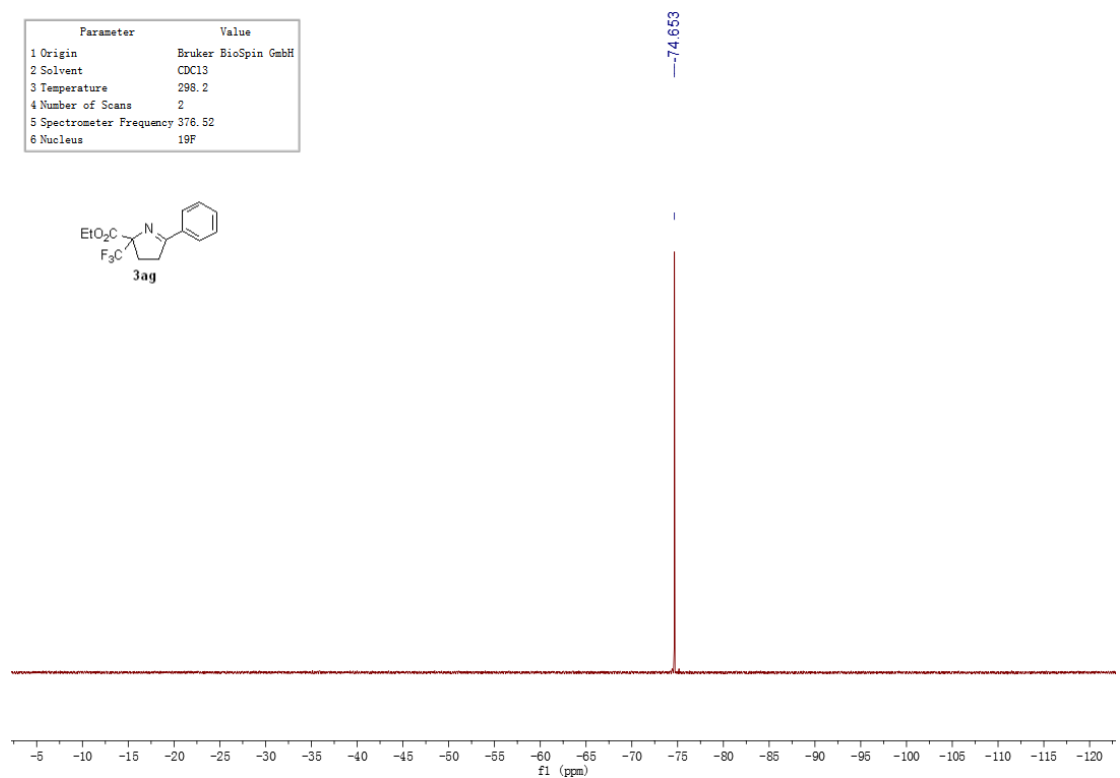

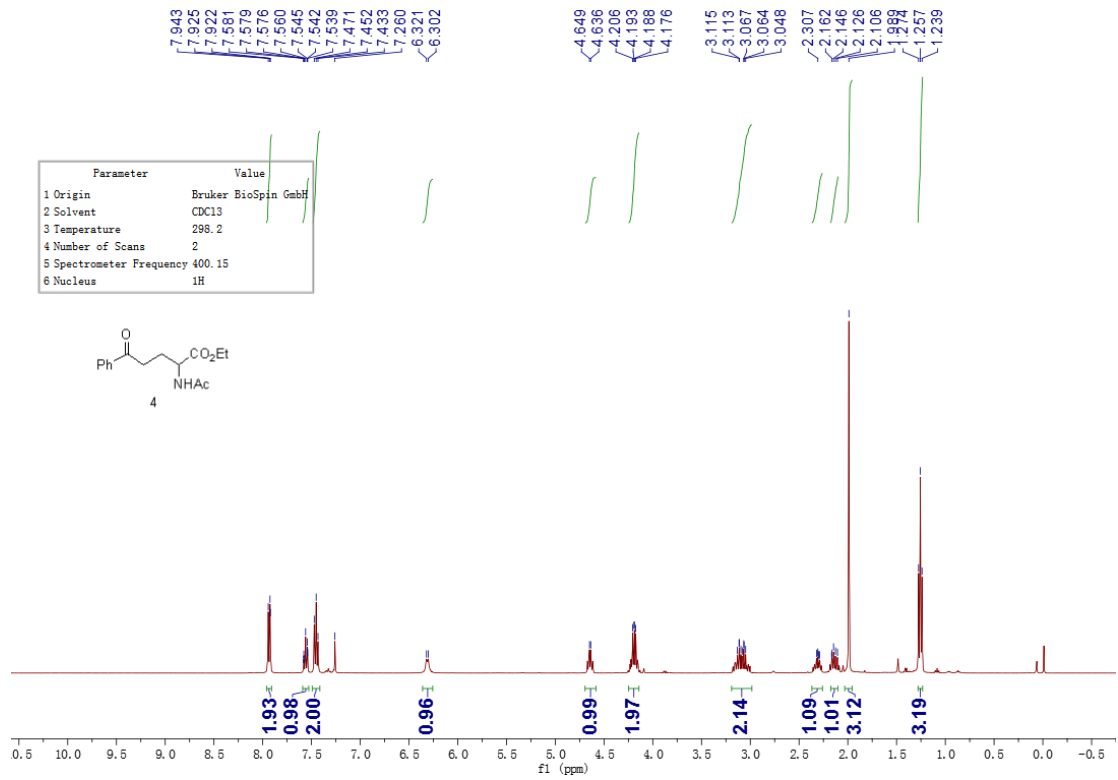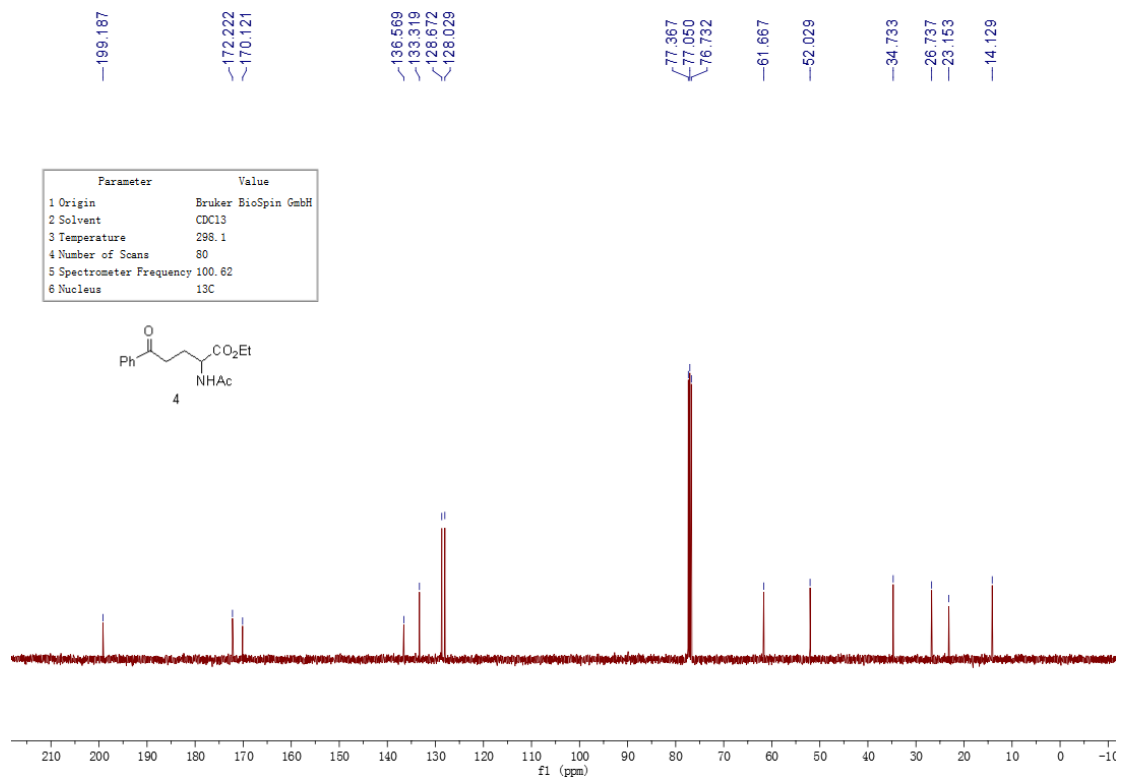

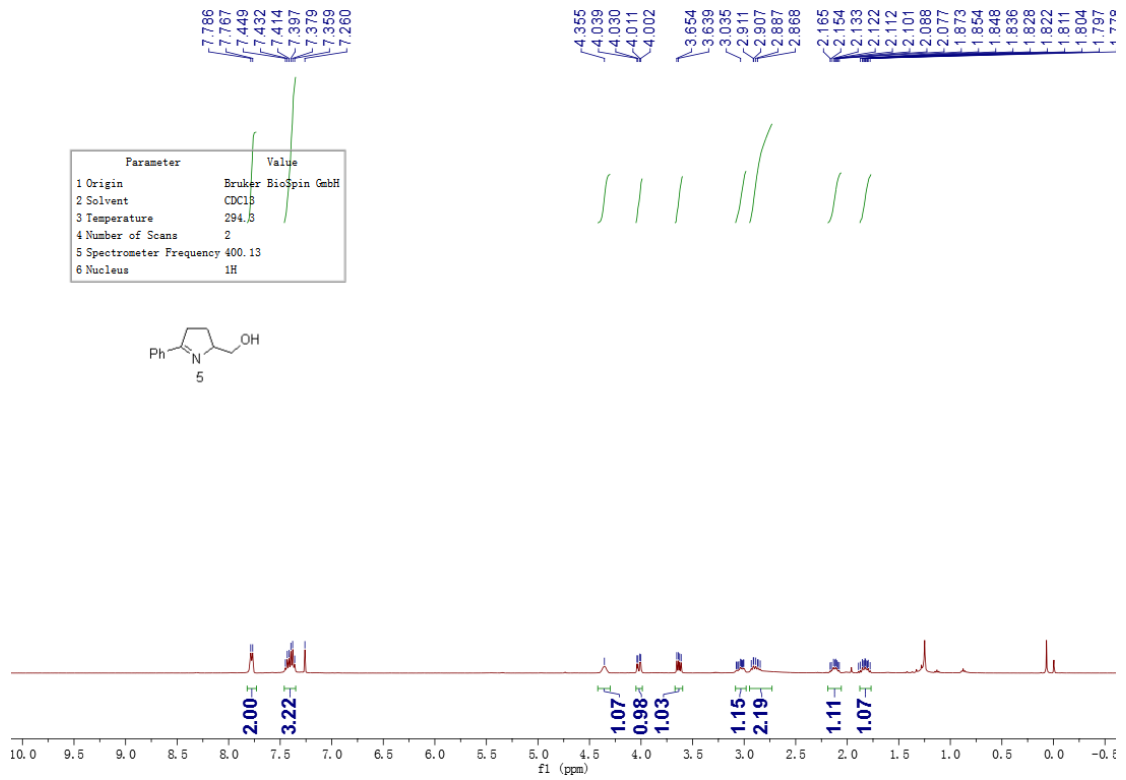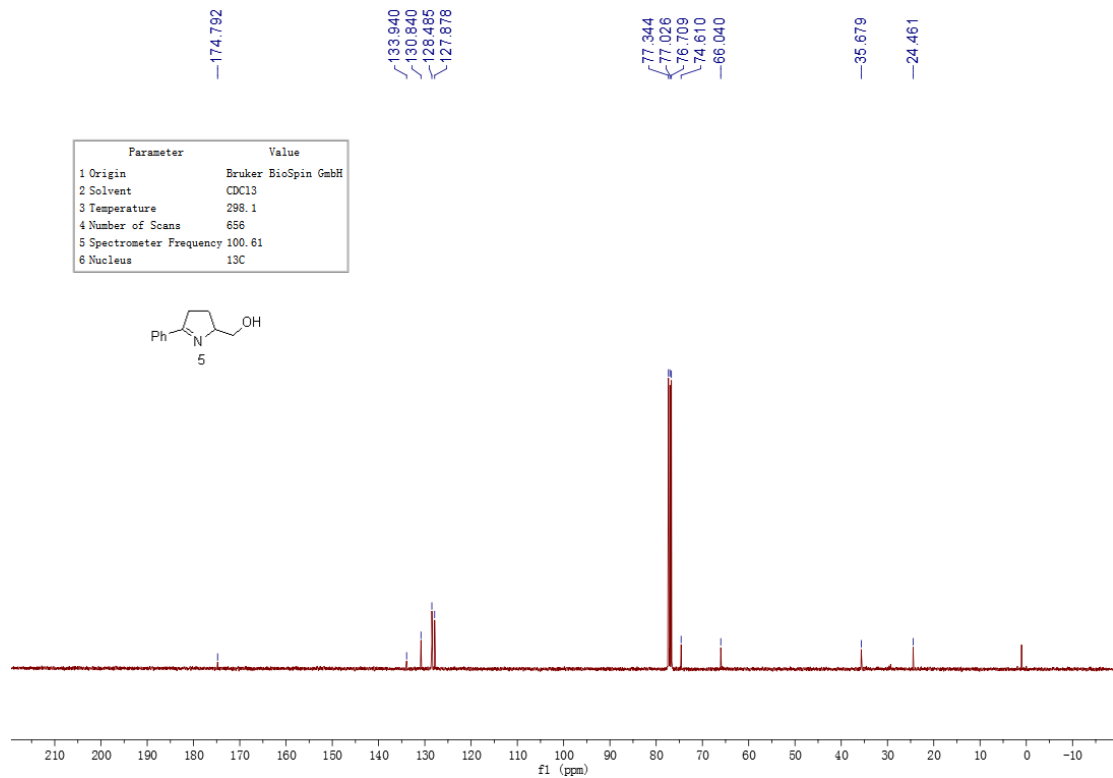

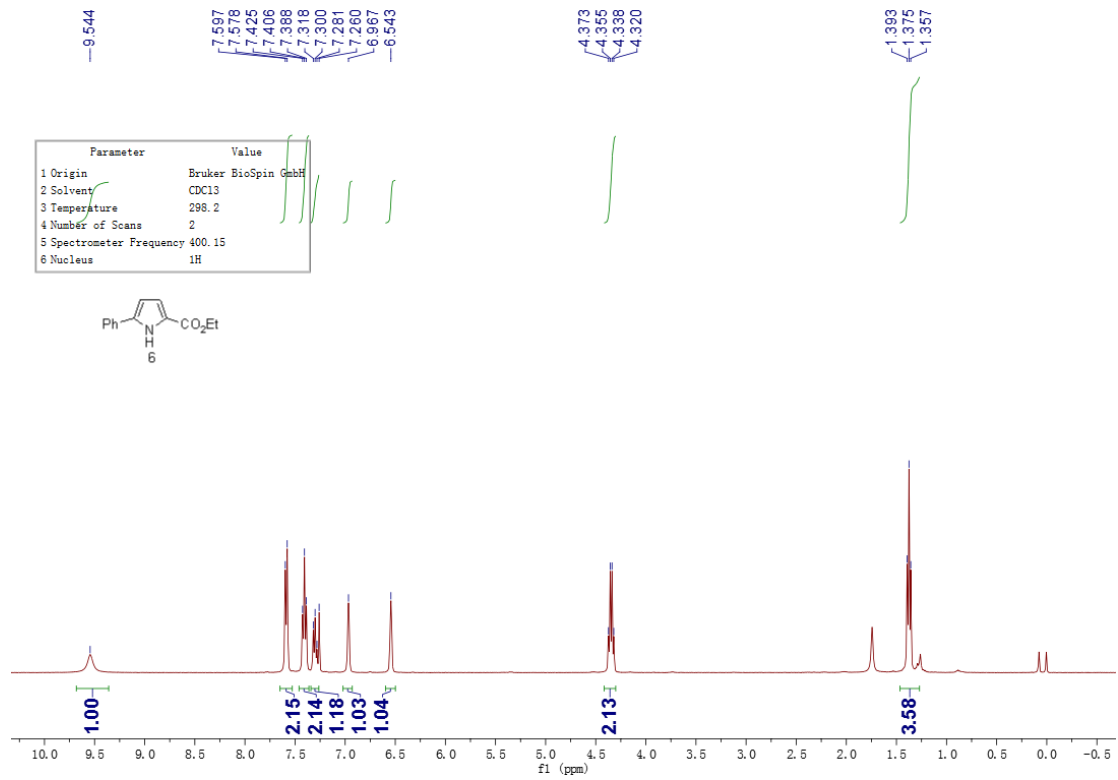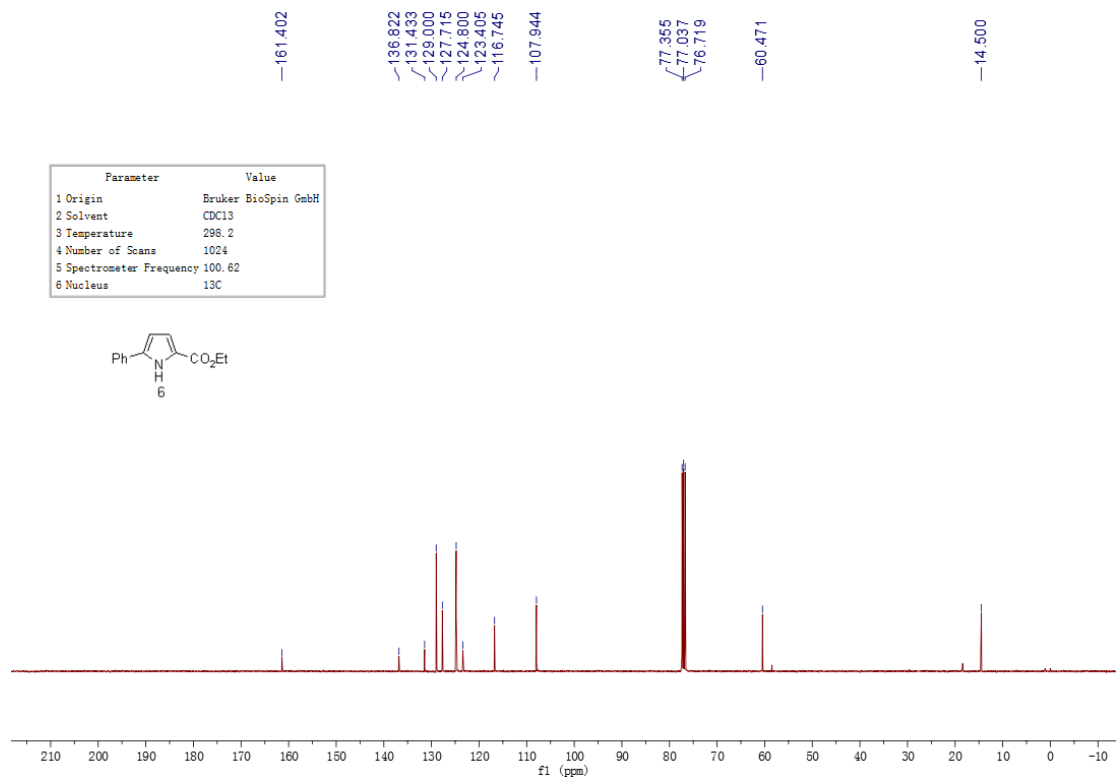

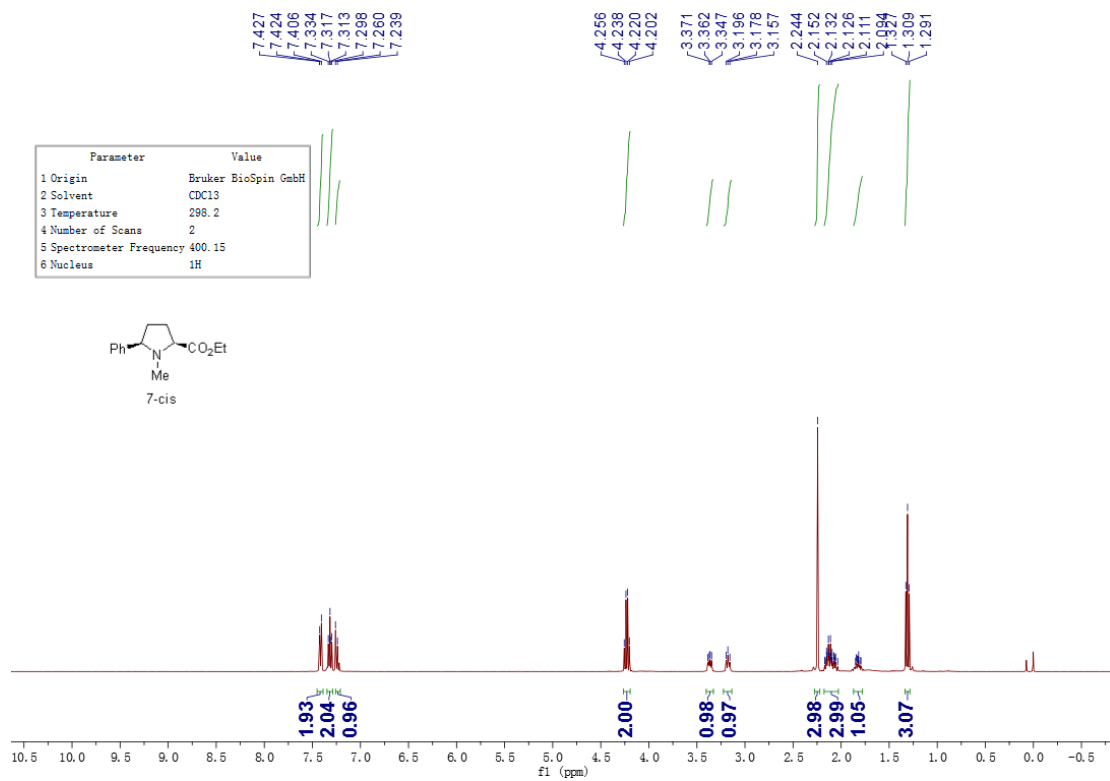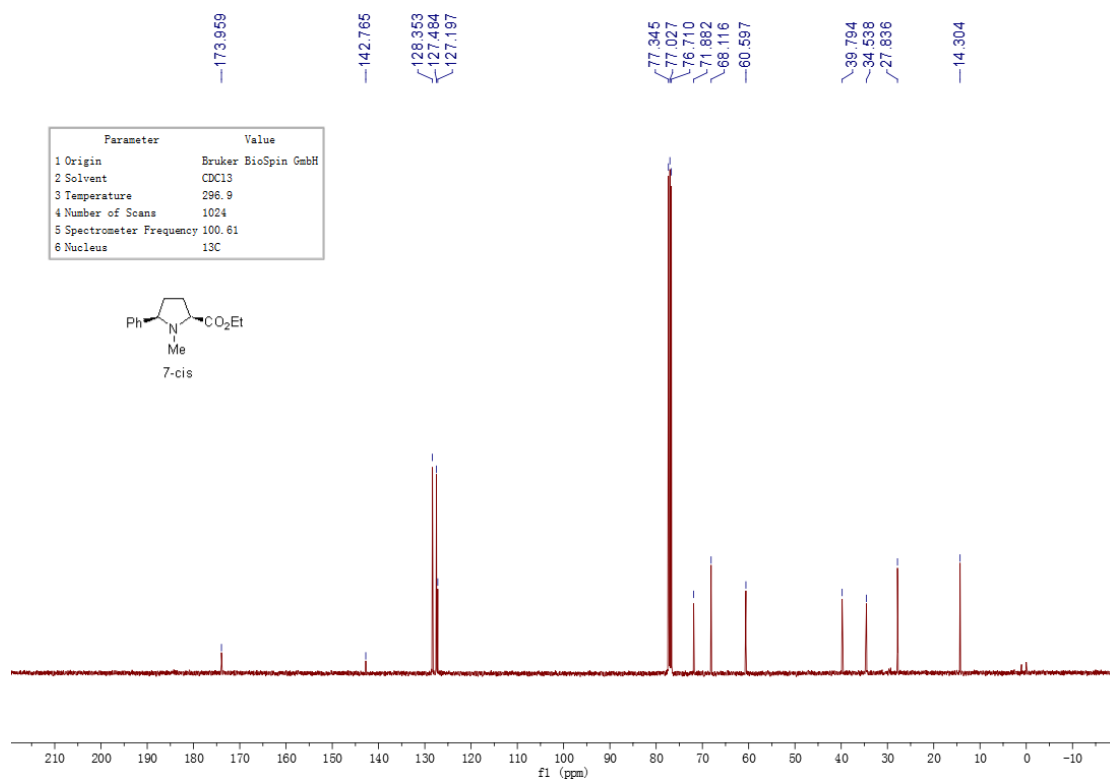



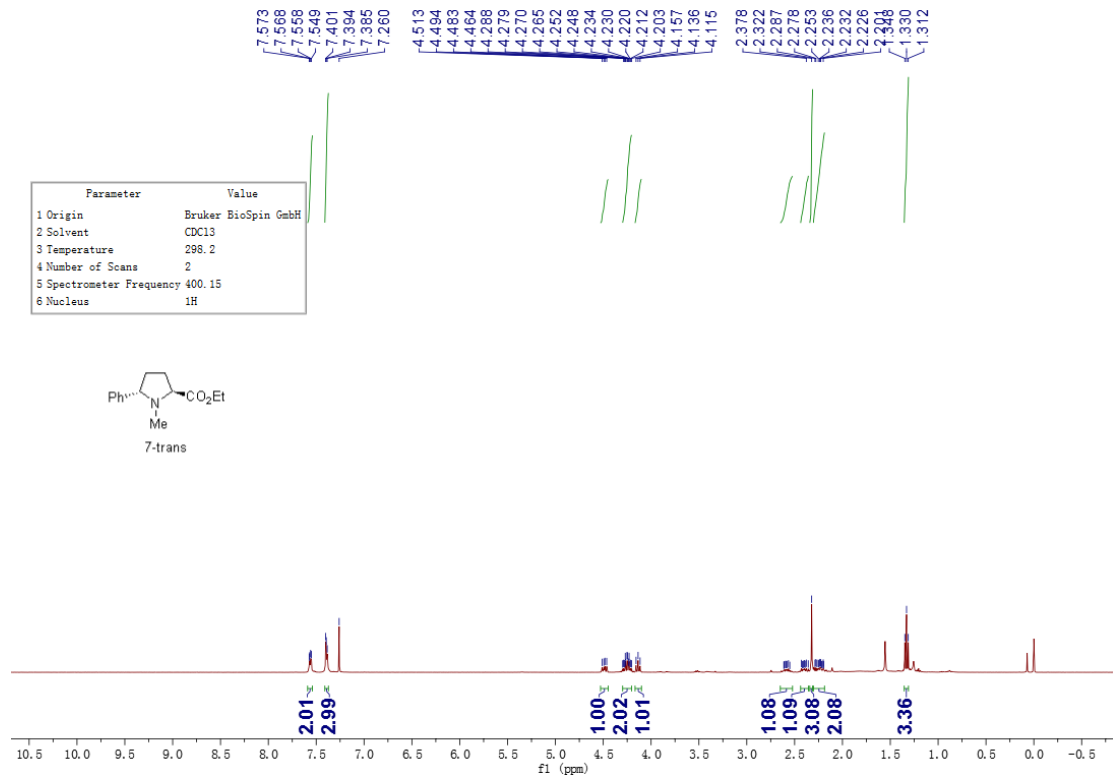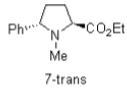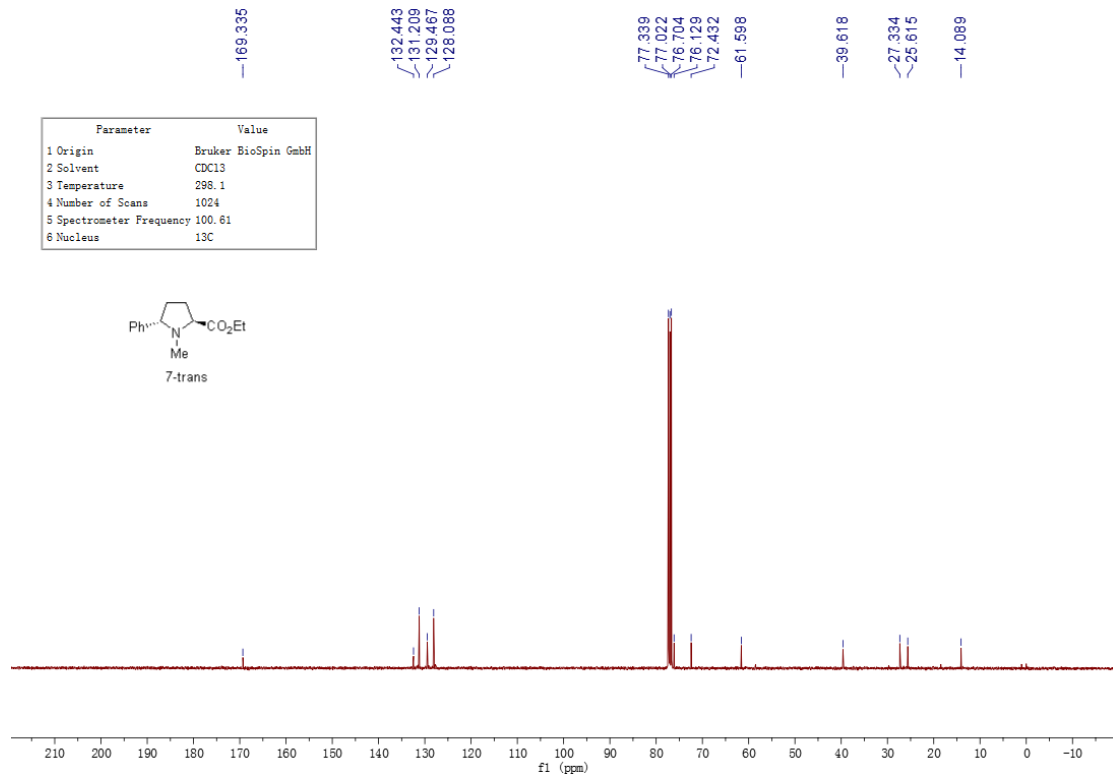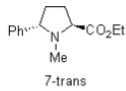

Supplement: d2sc00015f1.pdf [file d2sc00015f1.pdf]
